# Supplementary material
Source: ML conference proceedings conference paper supplement (https://proceedings.neurips.cc/paper_files/paper/2021/hash/d69c7ebb6a253532b266151eac6591af-Abstract.html)
Supplement: Supplementary file 1 [file d69c7ebb6a253532b266151eac6591af-Supplemental.pdf]

---

# Optimal Best-Arm Identification Methods for Tail-Risk Measures

---

**Shubhada Agrawal**  
TIFR, Mumbai, India  
shubhadaiitd@gmail.com

**Wouter M. Koolen**  
CWI, Amsterdam  
wmkoolen@cwi.nl

**Sandeep Juneja**  
TIFR, Mumbai, India  
juneja@tifr.res.in

## Abstract

Conditional value-at-risk (CVaR) and value-at-risk (VaR) are popular tail-risk measures in finance and insurance industries as well as in highly reliable, safety-critical uncertain environments where often the underlying probability distributions are heavy-tailed. We use the multi-armed bandit best-arm identification framework and consider the problem of identifying the arm from amongst finitely many that has the smallest CVaR, VaR, or weighted sum of CVaR and mean. The latter captures the risk-return trade-off common in finance. Our main contribution is an optimal  $\delta$ -correct algorithm that acts on general arms, including heavy-tailed distributions, and matches the lower bound on the expected number of samples needed, asymptotically (as  $\delta$  approaches 0). The algorithm requires solving a non-convex optimization problem in the space of probability measures, that requires delicate analysis. En-route, we develop new non-asymptotic, anytime-valid, empirical-likelihood-based concentration inequalities for tail-risk measures.

## 1 Introduction

Tail risk is a common term used to quantify losses occurring due to rare events, and has been an important topic in finance, insurance and other safety critical uncertain environments. [44] first formalized the problem of identifying optimal investment in financial assets as a multi-criteria optimization problem of maximizing the average return, while minimizing the risk (measured via variance). Since then, several other risk measures have been considered. Lately, risk-measures based on tails of the distribution, like the conditional value-at-risk (CVaR) and value-at-risk (VaR), have gained popularity in financial regulations and risk management (see, [48, 47]), where the underlying probability distributions are mostly heavy tailed (i.e. having infinite moment generating function for all  $\theta > 0$ ). Informally, for a probability measure  $\eta$ , VaR at level  $\pi \in (0, 1)$  is the  $\pi^{th}$  quantile for  $\eta$ , i.e., the outcome below which there is exactly  $\pi$  mass. CVaR at level  $\pi$  is the conditional expectation of  $\eta$ , conditioned on values beyond the VaR at level  $\pi$ . See Section 2 for precise definitions, and [50, 46] for applications of these risk measures in finance and optimization. As opposed to VaR, CVaR is a coherent risk-measure, and is a preferable metric (see, [5] for precise definition and properties of coherence). Outside finance, these tail-risk measures are being used to control risk in operations management, for example, in inventory management [4], supply chain management [51], etc. Recently, coherent risk measures, especially CVaR, have also been used in connection with fairness in machine learning [58].

The importance of these risk measures in the sequential decision making set-up has well been acknowledged (see, [49, 42]). Typically in the stochastic multi-armed bandit (MAB) literature, the quality of an arm is measured using its mean. Tight asymptotic and finite time guarantees exist for different MAB problems with performance measured by the mean (see, [27, 36, 16, 13, 1, 7, 53]). Also, see [12] for a survey of the variants of stochastic MAB problems. However, maximizing the average reward is not always the primary desirable objective. In clinical trials, for example, the treatment that is good on average might result in adverse outcomes for some patients. In finance, one

is typically interested in balancing the mean return with the risk of extreme losses. Risk sensitivity has been well studied in the online learning setting, where in each round, the player sees reward from every arm (see, [24, 56]). However, there is very limited work which incorporates these risk-measures into the MAB framework.

In this paper, we provide a systematic approach for identifying the distribution (or arm) from a given finite set of distributions (or arms) with minimum tail-risk (as measured by CVaR or VaR, or by a conic combination of mean and CVaR, which we will henceforth refer to as the “mean-CVaR” objective). Adopting the best-arm identification (BAI) framework of the stochastic MAB problem, we consider algorithms that generate samples from the given arms, and are  $\delta$ -correct, i.e., identify the correct answer (arm with minimum VaR, CVaR or mean-CVaR) with probability at least  $1 - \delta$ , for some pre-specified confidence level  $\delta$ . While ensuring  $\delta$ -correctness, the aim is to minimize the number of samples needed by the algorithm before its termination. This is the typical fixed-confidence setting of the BAI MAB problem (see, [37, 2]). Variants of this problem have been widely studied in the literature, where the best-arm is the one with maximum mean (see, [43, 25, 6, 14, 26, 33, 27, 34]).

A relaxation of the pure exploration setting described above is the  $(\epsilon, \delta)$ -PAC setting, where the aim is to output an  $\epsilon$ -optimal arm (for an appropriate notion of  $\epsilon$ -optimality), with probability at least  $1 - \delta$ , while minimizing the number of samples generated. [59, 18, 32] consider the pure exploration problem of identifying the arm with minimum risk in the  $(\epsilon, \delta)$ -PAC setting. While [59] consider both VaR and CVaR as measures of risk, [18, 32] focus on the VaR-problem. Recently, [39] and [35] have studied the BAI MAB problem with CVaR and mean-CVaR objectives, respectively, in the closely related “fixed-budget” framework, in which the total number of samples the algorithm is allowed to take is fixed, and the aim of the algorithm is to minimize the error-probability.

## 1.1 Outline of the approach and main assumption

As a warm-up, we first solve our minimum tail risk identification problems in the simple commonplace setting of arm-distributions belonging to a canonical single parameter exponential family (SPEF) of distributions. Each distribution in this family is uniquely identified with its parameter. We show that both CVaR and VaR are monotonic functions of this parameter, as is the mean. Hence, finding the best-(CVaR/VaR/mean-CVaR) arm reduces to finding the arm with the minimum mean.

Since risk-sensitive objectives are particularly important when there is a non-trivial probability of occurrence of extreme outcomes, it is important to consider arm-distributions beyond canonical SPEF, for which the above-mentioned equivalence breaks. We solve the VaR problem for arbitrary arm distributions.

In contrast the CVaR problem is unlearnable in full generality: on the class of all arm distributions, any  $\delta$ -correct algorithm requires an infinite number of samples in expectation to identify the best arm amongst any finite collection of arms (Remark 3.1). To avoid this, we impose a mild and standard raw  $(1 + \epsilon)$ -moment restriction on the arm-distributions. Let  $\mathcal{P}(\mathbb{R})$  denote the collection of all the probability distributions on the reals  $\mathbb{R}$ , and let  $B$  and  $\epsilon$  be positive constants. For risk measure CVaR and for the mean-CVaR objective, we restrict the class of allowed arm distributions to

$$\mathcal{L} = \left\{ \eta \in \mathcal{P}(\mathbb{R}) : \mathbb{E}_\eta \left( |X|^{1+\epsilon} \right) \leq B \right\}.$$

We discuss the choice of parameters in Section 1.3 below. For each tail measure, we prove information-theoretic lower bounds on the sample complexity of any  $\delta$ -correct algorithm, and use these to develop a  $\delta$ -correct algorithm whose sample complexity exactly matches the lower bound as  $\delta \rightarrow 0$ , for CVaR, mean-CVaR, and VaR problems. The mean-CVaR problem is conceptually and technically similar to the CVaR problem. Hence, for simplicity of presentation, we primarily focus on the CVaR setting in the main text and give details of the mean-CVaR setting in Appendix I. We also spell out the somewhat analogous analysis for the VaR setting towards the end (Section 4.2), with details deferred Appendix to H.

## 1.2 Technical contributions

As is well known in the BAI MAB literature, the lower bound problem takes the underlying arm distributions as inputs and solves for optimal weights that determine the proportion of samples that should ideally be allocated to each arm. The proposed algorithm uses a plugin strategy that at each

sequential stage, modulo mild forced exploration, uses the generated empirical distributions as a proxy for the true distributions and arrives at weights that guide the sequential sampling strategy.

In order to highlight the technical challenges arising in our non-parametric case, we will need to introduce two functionals next that are central to our lower bounds, algorithms, confidence intervals etc.

**Information distance for CVaR problem:** Given  $\eta_1, \eta_2$  in  $\mathcal{P}(\mathbb{R})$ , let  $\text{KL}(\eta_1, \eta_2)$  denote the KL-divergence between them, i.e.,  $\text{KL}(\eta_1, \eta_2) := \int \log \frac{d\eta_1}{d\eta_2}(y) d\eta_1(y)$ . Furthermore, for the probability measure  $\eta$  let  $c_\pi(\eta)$  denote its CVaR at the given confidence level  $\pi \in (0, 1)$  (see Section 2 for the exact definition). Then, given  $\eta \in \mathcal{P}(\mathbb{R})$  and  $x \in \mathbb{R}$ , we define functionals  $\text{KL}_{\text{inf}}^{\text{U}} : \mathcal{P}(\mathbb{R}) \times \mathbb{R} \rightarrow \mathbb{R}^+$ , and  $\text{KL}_{\text{inf}}^{\text{L}} : \mathcal{P}(\mathbb{R}) \times \mathbb{R} \rightarrow \mathbb{R}^+$ , where  $\mathbb{R}^+$  denotes the non-negative reals, as

$$\text{KL}_{\text{inf}}^{\text{U}}(\eta, x) := \min_{\kappa \in \mathcal{L}: c_\pi(\kappa) \geq x} \text{KL}(\eta, \kappa) \quad \text{and} \quad \text{KL}_{\text{inf}}^{\text{L}}(\eta, x) := \min_{\kappa \in \mathcal{L}: c_\pi(\kappa) \leq x} \text{KL}(\eta, \kappa). \quad (1)$$

See [2, 30, 15] for related quantities. These projection functionals appear in the lower bound (Section 3), and are central to our plugin algorithm.

Unlike their analogues in the mean case,  $\text{KL}_{\text{inf}}^{\text{U}}$  and  $\text{KL}_{\text{inf}}^{\text{L}}$  in (1) are not symmetric, and need to be studied separately. In particular,  $\text{KL}_{\text{inf}}^{\text{U}}$  is a convex optimization problem, while  $\text{KL}_{\text{inf}}^{\text{L}}$  is not. This is because  $c_\pi(\cdot)$  is a concave function, whence, the CVaR constraint in the  $\text{KL}_{\text{inf}}^{\text{L}}$  problem in (1) renders the feasible region non-convex (see Section 2). CVaR can be expressed as the optimal value of a minimization problem. This helped in re-expressing  $\text{KL}_{\text{inf}}^{\text{L}}$  as minimization over 2 variables, fixing one of which resulted in convex optimization over the other (see Section 3).

For proving  $\delta$ -correctness, we develop a new concentration inequality for weighted sums of these functionals (Proposition 4.2). Dual representations of these suggest natural candidates for supermartingales, whose mixtures help us in proving the concentration result. Similar inequalities were developed in [38, 20, 54] in different settings. See [40, Chapter 20] for an overview of the method of mixtures. We also propose  $\text{KL}_{\text{inf}}^{\text{U}}$ - and  $\text{KL}_{\text{inf}}^{\text{L}}$ -based tight anytime-valid confidence intervals for CVaR for heavy-tailed distributions, and show that classical confidence intervals derived using popular truncation-based estimators can be recovered using our method, with only a minor overhead (see Section 4.3).

Since distributions in  $\mathcal{L}$  are not characterized by parameters, we work in the space of probability measures instead of in the Euclidean space. A key and non-trivial requirement for the proof of asymptotic optimality of the algorithm is the joint continuity of  $\text{KL}_{\text{inf}}^{\text{L}}$  and  $\text{KL}_{\text{inf}}^{\text{U}}$  in a well-chosen metric, which should generate a topology that is sufficiently fine to ensure this continuity, but coarse to ensure fast convergence of the empirical distributions to the true-arm distributions. We endow  $\mathcal{P}(\mathbb{R})$  with the topology of weak convergence, or equivalently, with the Lévy metric (see Section 2 for definitions). Another nuance in our analysis is that the empirical distributions may not lie in  $\mathcal{L}$ . This is handled by projecting these on to  $\mathcal{L}$  under a suitable metric.

Our proposed algorithm is a plugin strategy that involves solving the lower bound problem using the empirical distributions as a proxy for the actual arm distributions. This can be computationally demanding especially as the underlying samples in the empirical distribution become large. To ease the numerical burden we propose modifications that require solving the lower bound only order  $\log(n)$  many times till stage  $n$  of the algorithm (where  $n$  samples are generated). This modification substantially reduces the computation burden. We show that it is optimal up to a constant (Appendix K).

**VaR problem:** Our algorithm for CVaR, with  $\text{KL}_{\text{inf}}^{\text{L}}$  and  $\text{KL}_{\text{inf}}^{\text{U}}$  replaced by the corresponding functionals with the VaR constraints instead, is asymptotically optimal for this problem in complete generality (Section 4.2). Here,  $\text{KL}_{\text{inf}}^{\text{U}}$  and  $\text{KL}_{\text{inf}}^{\text{L}}$  have closed form representations. However, they are no longer jointly-continuous in the Lévy metric, which introduces new technical challenges in the analysis of the algorithm.

### 1.3 Regarding the choice of $\epsilon$ and $B$ in our assumption

Firstly, BAI problems are important in simulation where the best model may need to be identified amongst many intricate models in terms of a performance measure such as CVaR or VaR, using minimal computational effort (see, [31]). Input distributions in simulation are known and may often

involve heavy tails. In some cases, by the use of Lyapunov-function-based techniques, bounds on moments of output random variables,  $B$ , can be determined. (see, e.g., [28] and references therein). Secondly, consider rewards (returns) from a number of hedge funds. Each time some amount of money is invested into a fund, a random return may be revealed from that fund but not from others. To assume that these returns come from a class of parametric distributions or have known bounded support can be a substantially inaccurate simplification. Typically, from historical analysis, it is known that the distribution of securities have a particular tail index, say,  $(1 + \epsilon)$ . For stock returns, extensive research suggests that  $(1 + \epsilon) \in [2, 5]$ . For daily exchange rates and income and wealth distributions we may have  $(1 + \epsilon) \in (1, 2]$ . Extreme value theory, under reasonable dependence structure amongst underlying securities, shows that a portfolio (a weighted sum) will also have the same tail index of  $(1 + \epsilon)$  (see, [19]). So the key approximation needed is in arriving at  $B$ . It is easy to arrive at distributions  $\eta$  and  $\kappa$  whose  $(1 + \epsilon)^{th}$  moments are arbitrarily far while the KL distance between them is arbitrarily close to zero. This makes it difficult to infer  $B$  from a given sample of data without further restriction on the two distributions. One may take a pragmatic view and approximate  $B$  by estimating the  $(1 + \epsilon)^{th}$  moment from observed samples and padding it up with a reasonably large factor. A further set of distributional assumptions would be needed to justify the above procedure to arrive at  $B$ . Again, verifying those assumptions will entail similar problems. In practice, one may live with the above approximation even though in rare settings it may be inaccurate and lead to sub-optimal allocations in our algorithm. One accepts this risk as one often accepts the assumption that the distributions of the random samples from each arm are time stationary or are independent, even though these may only be approximately correct.

## 2 Background

For  $K \geq 2$ , let  $\mathcal{M} = \mathcal{L}^K$  denote the collection of all  $K$ -vectors of distributions,  $\nu = (\nu_1, \dots, \nu_K)$ , such that for all  $i$ ,  $\nu_i$  belongs to  $\mathcal{L}$ . Let  $\mu \in \mathcal{M}$  be the given bandit problem, and  $\pi \in (0, 1)$  denote the fixed confidence level. For  $\eta \in \mathcal{P}(\mathbb{R})$ , let  $F_\eta(y) = \eta((-\infty, y])$  denote the CDF function for  $\eta$ , and let  $m(\eta)$  denote mean of measure  $\eta$ .

**VaR, CVaR:** With the above notation, VaR at level  $\pi$  for the distribution  $\eta$ , denoted as  $x_\pi(\eta)$ , equals  $\min \{z \in \mathbb{R} : F_\eta(z) \geq \pi\}$ . Since  $F_\eta(\cdot)$  is a non-decreasing and right-continuous function, the minimum in the expression of VaR is always attained. Define CVaR at level  $\pi$ ,  $c_\pi(\eta)$ , as

$$c_\pi(\eta) = \frac{F_\eta(x_\pi(\eta)) - \pi}{1 - \pi} x_\pi(\eta) + \frac{1}{1 - \pi} \int_{x_\pi(\eta)}^{\infty} y dF_\eta(y).$$
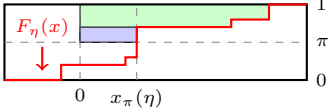

If  $\eta$  has a density in a neighbourhood around  $x_\pi$ , then  $c_\pi(\eta) = \mathbb{E}_\eta(X|X \geq x_\pi(\eta))$ , i.e., it measures the average loss conditioned on the event that losses are larger than the VaR.

In the figure above, the total shaded area (green and blue regions, together) divided by  $1 - \pi$  denotes the CVaR of the measure whose CDF function is displayed in red. To see this, observe that the first term in the expression above, scaled by  $(1 - \pi)$ , equals the blue region. The integral in the second term when simplified using integration by parts can be seen to equal the green region. There are alternative formulations of CVaR, which we state without proofs.

$$c_\pi(\eta) = \frac{1}{1 - \pi} \int_{p \in [\pi, 1]} x_p(\eta) dp = \min_{x_0 \in \mathbb{R}} \left\{ x_0 + \frac{1}{1 - \pi} \mathbb{E}_\eta((X - x_0)_+) \right\} \quad (2)$$

$$= \max_{v \in M^+(\mathbb{R})} \frac{1}{1 - \pi} \int_{\mathbb{R}} y dv(y) \quad \text{s.t.} \quad \forall y, dv(y) \leq d\eta(y) \quad \text{and} \quad \int_{\mathbb{R}} dv(y) = 1 - \pi, \quad (3)$$

where  $(x)_+$  denotes  $\max\{0, x\}$  and  $M^+(\mathbb{R})$  denotes collection of all non-negative measures on  $\mathbb{R}$ .

From (2), since  $c_\pi(\eta)$  is a minimum of linear functions of  $\eta$ , it is a concave function of  $\eta$ . Thus, the  $\text{KL}_{\text{inf}}^U$  problem in (1) is a convex optimization problem, while the  $\text{KL}_{\text{inf}}^L$  problem is not, since the  $c_\pi(\cdot)$  constraint makes the feasible region non-convex. See, [50] for a comprehensive tutorial on the two tail-risk measures, and their properties.

**Parametric case:** Using the definition of VaR, it can be argued that  $x_\pi(\eta_\theta)$  is a monotonically increasing function of  $\theta$  when  $\eta_\theta$  belongs to a canonical SPEF with parameter  $\theta$ , as is the mean. The

first formulation in 2 then gives that  $c_\pi(\eta_\theta)$  is also monotonically increasing. Thus, the problem of identifying the best-(CVaR/VaR/mean-CVaR) arm is equivalent to identifying that with minimum mean. See Appendix A for details.

However, the ranking in mean and in CVaR can be very different in general. To see this, fix  $\pi = 0.8$ , and consider a 3-armed bandit instance,  $\nu$ , with  $\nu_1 = 0.8\delta_0 + 0.2\delta_1$ ,  $\nu_2 = 0.8\delta_0 + 0.2\delta_{0.5}$ , and  $\nu_3 = 0.8\delta_{-0.5} + 0.2\delta_2$ . Clearly,  $m(\nu_1) > m(\nu_2) > m(\nu_3)$ , yet  $c_\pi(\nu_2) < c_\pi(\nu_1) < c_\pi(\nu_3)$ .

**General case:** For  $\eta$  in class  $\mathcal{L}$ , the moment-constraint limits the minimum and maximum possible values of VaR and CVaR, as discussed in the following lemma (proof in Appendix B).

**Lemma 2.1.** *For  $\eta \in \mathcal{L}$ ,  $c_\pi(\eta) \in D$  and  $x_\pi(\eta) \in C$ , where*

$$D \triangleq \left[ -B^{\frac{1}{1+\epsilon}}, \left( \frac{B}{1-\pi} \right)^{\frac{1}{1+\epsilon}} \right] \quad \text{and} \quad C \triangleq \left[ -\left( \frac{B}{\pi} \right)^{\frac{1}{1+\epsilon}}, \left( \frac{B}{1-\pi} \right)^{\frac{1}{1+\epsilon}} \right].$$

**Topology of weak convergence and the Lévy metric:** Let  $\phi$  be a bounded and continuous function on  $\mathbb{R}$ ,  $\delta > 0$ , and  $x \in \mathbb{R}$ . Consider the topology on  $\mathcal{P}(\mathbb{R})$ , generated by the base sets of the form  $\mathcal{U}(\phi, x, \delta) = \{\eta \in \mathcal{P}(\mathbb{R}) : |\int_{\mathbb{R}} \phi(y) d\eta(y) - x| < \delta\}$ . Weak convergence of a sequence  $\kappa_n$  to  $\kappa$ , denoted as  $\kappa_n \xrightarrow{D} \kappa$ , is convergence in this topology [see 23, Section D.2]. It is equivalent to convergence in the Lévy metric on  $\mathcal{P}(\mathbb{R})$ , (denoted by  $d_L$ ), defined next (see, [9, Theorem 6.8], [23, Theorem D.8]). For  $\eta, \kappa \in \mathcal{P}(\mathbb{R})$ ,  $d_L(\eta, \kappa)$  equals  $\inf \{\delta > 0 : F_\eta(x - \delta) - \delta \leq F_\kappa(x) \leq F_\eta(x + \delta) + \delta, \forall x \in \mathbb{R}\}$ . Additionally, the metric space  $(\mathcal{P}(\mathbb{R}), d_L)$  is complete and separable.

### 3 Lower bound

We consider  $\delta$ -correct algorithms for identifying the arm with minimum CVaR, acting on bandit problems in  $\mathcal{M}$ . While ensuring  $\delta$ -correctness, the aim is to minimize the sample complexity, i.e., expected number of samples generated by the algorithm before it terminates. As is well known, the  $\delta$ -correctness property imposes a lower bound on the sample complexity of such algorithms.

Let  $\mu \in \mathcal{M}$  denote the given bandit problem. Henceforth, for ease of notation, we assume without loss of generality that the best-CVaR arm in  $\mu$  is arm 1. Let  $\Sigma_K$  denote the probability simplex in  $\mathbb{R}^K$ ,  $\mathcal{A}_j$  denote the collection of all bandit problems in  $\mathcal{M}$  which have arm  $j$  as the best-CVaR arm,  $\tau_\delta$  be the stopping time for the  $\delta$ -correct algorithm,  $N_a(\tau)$  denote the number of times arm  $a$  has been sampled by the algorithm, and for a set  $S$ , let  $S^\circ$  denote its interior. It is easy to deduce using standard arguments (see, e.g., [40, Theorem 33.5]) that for a  $\delta$ -correct algorithm acting on  $\mu \in \mathcal{A}_1$ ,

$$\mathbb{E}(\tau_\delta) \geq V(\mu)^{-1} \log \frac{1}{4\delta} \quad \text{where} \quad V(\mu) = \sup_{t \in \Sigma_K} \inf_{\nu \in \mathcal{A}_1^c} \sum_{a=1}^K t_a \text{KL}(\mu_a, \nu_a), \quad \text{and} \quad \mathcal{A}_j^c = \mathcal{M} \setminus \mathcal{A}_j. \quad (4)$$

**Lemma 3.1.** *For  $\mu \in \mathcal{A}_1$ , the inner minimization problem in  $V(\mu)$  equals*

$$\min_{j \neq 1} \inf_{x \leq y} \{t_1 \text{KL}_{\inf}^U(\mu_1, y) + t_j \text{KL}_{\inf}^L(\mu_j, x)\},$$

and hence

$$V(\mu) = \sup_{t \in \Sigma_K} \min_{j \neq 1} \inf_{x \leq y} \{t_1 \text{KL}_{\inf}^U(\mu_1, y) + t_j \text{KL}_{\inf}^L(\mu_j, x)\}. \quad (5)$$

Recall from (1) that the expressions in (4) and (5) above differ from those in the best-mean arm setting in that the functionals  $\text{KL}_{\inf}^L$  and  $\text{KL}_{\inf}^U$  here are defined instead with the CVaR constraints.

**Remark 3.1.** Without any restriction on arm distributions for the CVaR-problem, for  $y \in \mathbb{R}$  and  $\eta \in \mathcal{L}$ ,  $\text{KL}_{\inf}^U(\eta, y) = 0$ . This is essentially because  $\eta$  can be perturbed in KL only slightly by shifting an arbitrarily small mass from the lower tail to the extreme right, so that the CVaR constraint is satisfied. Thus, without any restrictions,  $V(\mu) = 0$  (see, [2, Lemma 1, Theorem 3] for similar results in selecting the arm with the largest mean setting). However, we later solve the VaR-problem without such assumptions, i.e., arm distributions are allowed to be arbitrary probability measures in  $\mathbb{R}$ . The lower bound for the VaR problem is as in (4), with  $\text{KL}_{\inf}^L$  and  $\text{KL}_{\inf}^U$  in the representation in (5) defined with VaR constraints, instead.

A proof of Lemma 3.1 can be found in Appendix C.1. Let  $t^* : \mathcal{M} \rightarrow 2^{\Sigma_K}$ . In particular, for  $\nu \in \mathcal{M}$ , let  $t^*(\nu)$  denote the set of maximizers in the  $V(\nu)$  optimization problem in (5). A key nuance of our algorithm and the related analysis is that the vector of empirical distributions may not belong to the class  $\mathcal{M}$ . The algorithm first projects the empirical distribution to class  $\mathcal{L}$ , then solves for the optimal  $t^*$  in (5) for the projected distributions, and samples the arms in proportion to the computed  $t^*$  (Section 4). For appropriate choices of the projection maps, the following lemmas guarantee that as the empirical distributions converge to the actual arm-distributions (in the weak topology), the  $t^*$  computed by the algorithm converge to the optimal weights corresponding to  $\mu$ .

**Lemma 3.2.**  *$\mathcal{L}$  is a compact set in the topology of weak convergence and the (Skorokhod transforms of) its members form a uniformly integrable collection of random variables. When restricted to  $\mathcal{L} \times D^\circ$ ,  $\text{KL}_{\inf}^L$  and  $\text{KL}_{\inf}^U$  are both jointly continuous functions of the arguments. Moreover, for fixed  $x$ ,  $\text{KL}_{\inf}^U(\nu, x)$  is a convex function of  $\nu$ .*

**Definition (Upper hemicontinuity)** A set-valued function  $\Gamma : S \rightarrow T$  is upper hemicontinuous at  $s \in S$  if for any open neighbourhood  $V$  of  $\Gamma(s)$  there exists a neighbourhood  $U$  of  $s$  such that for all  $x \in U$ ,  $\Gamma(x)$  is a subset of  $V$ .

**Lemma 3.3.**  *$t^*$  is an upper-hemicontinuous correspondence. For  $\nu \in \mathcal{M}^\circ$ ,  $t^*(\nu)$  is a convex set.*

In Lemma 3.2, we restrict to the interior of  $D$  as  $\text{KL}_{\inf}^U(\cdot, B^{\frac{1}{1+\epsilon}}(1-\pi)^{\frac{-1}{1+\epsilon}})$  and  $\text{KL}_{\inf}^L(\cdot, -B^{\frac{1}{1+\epsilon}})$  are not continuous (see, Remark C.2). In Lemma 3.3, we only need to eliminate distributions with these extreme CVaRs (there are only two such distributions. See, Remark C.1). Lemma 3.3 and Theorem 4.1 (optimality and  $\delta$ -correctness of the proposed algorithm) hold for distributions with CVaR in  $D^\circ$ . For ease of notation, we restrict  $\mu$  to lie in the interior of  $\mathcal{M}$ .

The proofs of the above two lemmas are technically challenging and involve nuanced analysis. Detailed steps are given in Appendix C.2 and C.3. We first prove joint lower- and upper-semicontinuity of the KL-projection functionals separately. These rely on various properties of the weak convergence of probability measures in  $\mathcal{L}$ , the dual representations for  $\text{KL}_{\inf}^L$  and  $\text{KL}_{\inf}^U$  (see Theorem 3.4), properties of CVaR for probability measures in  $\mathcal{L}$ , and the classical Berge's theorem (see, [52]) for continuity of the optimal value and the set of optimizers for a parametric optimization problem. We then use these to prove the continuity in Lemma 3.3. Convexity follows since  $t^*$  is the set of maximizers of a concave function over a convex, compact set.

**Understanding the lower bound:** Our proposed algorithm requires repeated evaluations of the lower bound in (4) at its estimates of  $\mu$ . To facilitate this, we now provide more tractable characterizations of the two KL-projection functionals, and in particular, of (5). We also discuss the statistical and computational implications of these alternative characterizations.

For  $\eta \in \mathcal{P}(\mathbb{R})$ , let  $\text{Supp}(\eta)$  denote the collection of points in the support of measure  $\eta$ . For  $v \in D^\circ$ ,  $x_0 \in C$ ,  $\lambda \in \mathbb{R}^3$ ,  $\gamma \in \mathbb{R}^2$ , and  $X \in \mathbb{R}$ , set

$$g^U(X, \lambda, v) = 1 + \lambda_1 v - \lambda_2(1 - \pi) + \lambda_3(|X|^{1+\epsilon} - B) - (\lambda_1 X(1 - \pi)^{-1} - \lambda_2)_+,$$

and

$$g^L(X, \gamma, v, x_0) = 1 - \gamma_1(v - x_0 - (X - x_0)_+(1 - \pi)^{-1}) - \gamma_2(B - |X|^{1+\epsilon}).$$

Furthermore, define  $\hat{S}(v) = \{\lambda_1 \geq 0, \lambda_2 \in \mathbb{R}, \lambda_3 \geq 0 : \forall x \in \mathbb{R}, g^U(x, \lambda, v) \geq 0\}$ , and  $\mathcal{R}_2(x_0, v)$  to be  $\{\gamma_1 \geq 0, \gamma_2 \geq 0 : \forall y \in \mathbb{R}, g^L(y, \gamma, v, x_0) \geq 0\}$ . Notice that these are convex sets.

As shown in Theorem 3.4 below,  $g^U(y, \cdot, v)$  and  $g^L(y, \cdot, v, x_0)$  are related to the dual formulations of  $\text{KL}_{\inf}^U$  and  $\text{KL}_{\inf}^L$ , respectively, and the parameters  $\lambda$  and  $\gamma$  are the corresponding dual variables. The sets  $\hat{S}$  and  $\mathcal{R}_2$  correspond to the feasible values of these dual variables.

**Theorem 3.4.** *For  $\eta \in \mathcal{P}(\mathbb{R})$  and  $v \in D^\circ$ ,*

(a)

$$\text{KL}_{\inf}^U(\eta, v) = \max_{\lambda \in \hat{S}(v)} \mathbb{E}_\eta(\log(g^U(X, \lambda, v))).$$

*The maximum in this expression is attained at a unique point  $\lambda^* \in \hat{S}(v)$ . The unique probability measure  $\kappa^* \in \mathcal{L}$  that achieves infimum in the primal problem satisfies*

$$\frac{d\kappa^*}{d\eta}(y) = \frac{1}{g^U(y, \lambda^*, v)}, \quad \text{for } y \in \text{Supp}(\eta).$$

Moreover, it has mass on at most 2 points outside  $\text{Supp}(\eta)$ . Furthermore, for  $y' \in \{\text{Supp}(\kappa^*) \setminus \text{Supp}(\eta)\}$ ,  $g^U(y', \lambda^*, v) = 0$ .

(b)

$$\text{KL}_{\inf}^L(\eta, v) = \min_{x_0 \in [-\left(\frac{B}{\pi}\right)^{\frac{1}{1+\epsilon}}, v]} \max_{\gamma \in \mathcal{R}_2(x_0, v)} \mathbb{E}_\eta(\log(g^L(X, \gamma, v, x_0))).$$

For a fixed  $x_0$ , the maximum in the inner problem is attained at a unique  $\gamma^*$  in  $\mathcal{R}_2(x_0, v)$ . The unique probability measure  $\kappa^* \in \mathcal{L}$  achieving infimum in the primal problem satisfies

$$\frac{d\kappa^*}{d\eta}(y) = \frac{1}{g^L(y, \gamma^*, v, x_0)}, \quad \text{for } y \in \text{Supp}(\eta).$$

Moreover, size of the set  $\{\text{Supp}(\kappa^*) \setminus \text{Supp}(\eta)\}$  is at most 1, and for  $y' \in \{\text{Supp}(\kappa^*) \setminus \text{Supp}(\eta)\}$ ,  $g^L(y' \gamma^*, v, x_0) = 0$ .

These dual formulations help in reformulating the lower bound optimization problem in (5) as optimization over reals. A computationally more efficient approach for this is to consider the joint dual of the inner optimization problem in (5).

For  $\eta_1, \eta_2 \in \mathcal{P}(\mathbb{R})$ , and non-negative weights  $\alpha_1, \alpha_2$ , let

$$Z = \inf_{x \leq y} \left\{ \alpha_1 \text{KL}_{\inf}^U(\eta_1, y) + \alpha_2 \text{KL}_{\inf}^L(\eta_2, x) \right\}. \quad (6)$$

For  $y \in \mathbb{R}$ ,  $\lambda \in \mathbb{R}^2$ ,  $\rho \in \mathbb{R}^2$ , and  $\gamma_2 \in \mathbb{R}$ , let

$$h^L(y, \lambda, \gamma, \rho, x_0) = 1 - \lambda_1 + \gamma_2(|y|^{1+\epsilon} - B) + \rho_1(x_0 + (y - x_0)_+(1 - \pi)^{-1}),$$

and

$$h^U(y, \lambda, \gamma, \rho) = 1 + \lambda_1 + \lambda_2(|y|^{1+\epsilon} - B) - (\rho_2 + (\rho_1 y - \rho_2)_+(1 - \pi)^{-1}).$$

For  $x_0 \in C$ , define the convex region  $\mathcal{D}_{x_0}$  to be collection of  $\lambda_1 \in \mathbb{R}$ ,  $\rho_2 \in \mathbb{R}$ ,  $\lambda_2 \geq 0$ ,  $\gamma_2 \geq 0$ , and  $\rho_1 \geq 0$ , such that for all  $y \in \mathbb{R}$ ,  $h^L(y, \lambda, \gamma, \rho, x_0) \geq 0$  and  $h^U(y, \lambda, \gamma, \rho) \geq 0$ . As we show next, these quantities are related to the dual formulation of (6).

**Proposition 3.5.** For  $\eta_1, \eta_2 \in \mathcal{P}(\mathbb{R})$  and weights  $\alpha_1, \alpha_2 \in [0, 1]$ ,  $Z$  equals

$$\begin{aligned} \min_{x_0 \in C} \max_{(\lambda, \gamma, \rho) \in \mathcal{D}_{x_0}} & \alpha_1 \mathbb{E}_{\eta_1}(\log(h^U(X, \lambda, \gamma, \rho))) + \alpha_2 \mathbb{E}_{\eta_2}(\log(h^L(X, \lambda, \gamma, \rho, x_0))) \\ & - \alpha_1 \log \alpha_1 - \alpha_2 \log \alpha_2 + (\alpha_1 + \alpha_2) \log(\alpha_1 + \alpha_2) - (\alpha_1 + \alpha_2) \log 2. \end{aligned}$$

An application of above to the empirical distributions ( $\eta_a = \hat{\mu}_a(t)$ ) weighted by sample counts, i.e.,  $\alpha_a = N_a(t)$ , for  $a \in \{1, 2\}$ , results in unweighted sums over the samples. Also observe that the representation in Proposition 3.5 is 1 dimension smaller compared to that obtained by using Theorem 3.4 in (6), and hence, is faster to optimize numerically.

Recall that while  $\text{KL}_{\inf}^U$  is a convex optimization problem,  $\text{KL}_{\inf}^L$  is not (see Section 2). To handle this, we use the min formulation for CVaR in 2 to turn it into a one-dimensional family of linear constraints, which appears as the outer  $\min_{x_0}$  in the expression in (b) in Theorem 3.4, and Proposition 3.5 above, with the range constraint from Lemma 2.1. This renders the remaining problem as a convex optimization problem. To simplify the CVaR constraint in  $\text{KL}_{\inf}^U$ , we use (3). Rest is the Lagrangian duality. Complete proofs for Theorem 3.4, and Proposition 3.5, are given in Appendix D.

The equality in Proposition 3.5, and the dual formulations in Theorem 3.4, are important statistically and computationally. First, our stopping rule will threshold the  $Z$  statistics to determine when to safely stop. So we need to bound the deviations of  $Z$ . For this, we will use the dual formulations from Theorem 3.4 in (6) to construct mixtures of super-martingales that dominate the deviations of  $Z$ . Second, our sampling rule will sample according to the optimal proportions evaluated for the empirical distribution vector,  $\hat{\mu}(t)$ , in (5). For this, we use Proposition 3.5 in our experiments to solve the inner optimization problem in (5). These will be made precise in Section 4.

Computing a gradient for the objective of the maximisation problem (5), seen as a function of the sampling weights  $t$ , takes one  $Z$  evaluation per suboptimal arm. The inner maximisation over  $\mathcal{D}_{x_0}$  is a constrained concave program, for which standard algorithms apply. The outer  $\min_{x_0}$  problem requires a different approach, as it is not even quasiconvex. Empirically it does become quasiconvex after seeing enough samples, so we employ a heuristic bisection search for which we measure the impact on the error probability (there is none). Numerical results are presented in Section 4.4.

## 4 The algorithm

Given a bandit problem  $\mu \in \mathcal{M}$ , our algorithm is a specification of three things: a sampling rule, a stopping rule, and a recommendation rule.

**Sampling rule:** At each iteration, the algorithm has access to the empirical distribution vector,  $\hat{\mu}(n)$ . It first projects  $\hat{\mu}(n)$  to  $\mathcal{L}^K$  in the Kolmogorov metric,  $d_K$ , using the projection map,  $\Pi$ , defined below. It then computes  $t^*(\Pi(\hat{\mu}(n)))$  and allocates samples using the C-tracking rule of [27], which we state in Appendix E for completeness. The map  $\Pi = (\tilde{\Pi}, \dots, \tilde{\Pi})$ , where  $\tilde{\Pi} : \mathcal{P}(\mathfrak{R}) \rightarrow \mathcal{L}$ , is given by

$$\tilde{\Pi}(\eta) \in \operatorname{argmin}_{\kappa \in \mathcal{L}} d_K(\eta, \kappa), \quad \text{where} \quad d_K(\eta, \kappa) := \sup_{x \in \mathfrak{R}} |F_\eta(x) - F_\kappa(x)|.$$

We show in Appendix G that this projection has a simple form and can be computed easily.

**Stopping rule:** We use a modification of the generalized likelihood ratio test (GLRT) (see, [17]) as our stopping criterion. At any time, the vector of empirical distributions,  $\hat{\mu}(n)$ , suggests an arm with minimum CVaR (empirically best-CVaR arm), say arm  $i$ . This is our null hypothesis, which we test against all the alternatives. Formally, the log of the GLRT statistic, denoted by  $S_i(n)$ , is  $\inf_{\nu' \in \mathcal{A}_i^c} \sum_{a=1}^K N_a(n) \text{KL}(\hat{\mu}_a(n), \nu'_a)$ . This is exactly the scaled inner optimization problem in the expression of  $V(\hat{\mu}(n))$  in (4), except that  $\hat{\mu}(n)$  may not belong to  $\mathcal{M}$  (recall the  $Z$  statistic defined in (6)). Let  $Z_i(n)$  equal  $\min_{a \neq i} \inf_{x \leq y} \{N_i(n) \text{KL}_{\inf}^U(\hat{\mu}_i(n), y) + N_a(n) \text{KL}_{\inf}^L(\hat{\mu}_a(n), x)\}$ . It equals  $S_i(n)$  when  $\hat{\mu}(n) \in \mathcal{M}$  (Lemma 3.1). Our stopping rule corresponds to checking

$$Z_i(n) \geq \beta(n, \delta) \quad \text{where} \quad \beta(n, \delta) = \log((K-1)\delta^{-1}) + 5\log(n+1) + 2. \quad (7)$$

**Recommendation rule:** After stopping, the algorithm outputs the arm with the minimum CVaR of the corresponding empirical distribution, i.e., if  $\tau$  is the stopping time of the algorithm, then it outputs  $\operatorname{argmin}_a c_\pi(\hat{\mu}_a(\tau))$ .

### 4.1 Theoretical guarantees

For a given confidence  $\delta$ , let  $\tau_\delta$  denote the stopping time for the algorithm. The algorithm makes an error if at time  $\tau_\delta$ , there is an arm  $j \neq 1$  such that  $c_\pi(\hat{\mu}_j(\tau_\delta)) < c_\pi(\hat{\mu}_1(\tau_\delta))$ . Let the error event be denoted by  $\mathcal{E}$ .

**Theorem 4.1.** *For  $\delta > 0$  and  $\mu \in \mathcal{M}^o$ , the proposed algorithm with  $\beta(t, \delta)$  chosen as in (7), satisfies*

$$\mathbb{P}(\mathcal{E}) \leq \delta \quad \text{and} \quad \limsup_{\delta \rightarrow 0} \frac{\mathbb{E}_\mu(\tau_\delta)}{\log(1/\delta)} \leq \frac{1}{V(\mu)}.$$

We first sketch the proof for the  $\delta$ -correctness part of the theorem. Proof ideas for sample complexity are presented later in this section. The detailed proof for Theorem 4.1 can be found in Appendix F.

**$\delta$ -correctness:** Recall that the algorithm makes an error if at time  $\tau_\delta$ , the empirically best-CVaR arm is not arm 1. As in the best-mean arm case, it can be argued that this probability is at most

$$\sum_{i=2}^K \mathbb{P}(\exists n : N_i(n) \text{KL}_{\inf}^U(\hat{\mu}_i(n), c_\pi(\mu_i)) + N_1(n) \text{KL}_{\inf}^L(\hat{\mu}_1(n), c_\pi(\mu_1)) \geq \beta). \quad (8)$$

See Appendix F for a proof of (8). The following proposition will be helpful in bounding each of the summands above. Setting  $j = 1$ , and  $x = \log \frac{K-1}{\delta}$  in Proposition 4.2, along with  $\beta$  from (7), we get that each summand in (8) is at most  $\delta/(K-1)$ , proving that the proposed algorithm is  $\delta$ -correct.

**Proposition 4.2.** *For  $i \in [K], j \in [K], i \neq j$ ,  $h(n) = 5\log(n+1) + 2$ , and  $x \geq 0$ ,*

$$\mathbb{P}(\exists n : N_i(n) \text{KL}_{\inf}^U(\hat{\mu}_i(n), c_\pi(\mu_i)) + N_j(n) \text{KL}_{\inf}^L(\hat{\mu}_j(n), c_\pi(\mu_j)) - h(n) \geq x) \leq e^{-x}.$$

A key step in proving Proposition 4.2 is constructing mixtures of super-martingales that dominate the exponentials of  $N_i(n) \text{KL}_{\inf}^U(\hat{\mu}_i(n), c_\pi(\mu_i))$  and  $N_j(n) \text{KL}_{\inf}^L(\hat{\mu}_j(n), c_\pi(\mu_j))$ . From Theorem 3.4(a) and (2), it can be shown that for fixed dual-variables, the objective is a sum of logs of random variables with mean at-most 1. Hence, its exponential is a non-negative candidate super-martingale. Since we want to bound the maximum over the dual parameters, we construct a mixture of these candidates, over the dual-parameters, and show that it dominates the exponential of  $N_i(n) \text{KL}_{\inf}^U(\hat{\mu}_i(n), c_\pi(\mu_i))$ .

**Sample complexity:** Our sample complexity proof follows that of [27] for a parametric family. However, we work with a more general non-parametric class, in which we establish continuity of the KL-projection functionals (Lemma 3.2). Our proof also differs from that in [2] in that we only have upper-hemicontinuity of the set of optimal sampling allocations ( $t^*$ ) (Lemma 3.3). A nuance in our analysis is that the empirical distribution may not belong to the class  $\mathcal{L}$ , in which case we project the empirical distribution onto that class, and the sampling rule uses this projected distribution to compute  $t^*$ . Our careful choice of the projection map aids in the proof of this result.

**Computational complexity:** The computational cost of these KL-projection functionals, and hence, that of the oracle weights, is linear in the number of samples taken (see, [2, 16, 30]). As a result, the overall run-time is quadratic in  $\tau_\delta$ . We propose a modification in which we update the weights only at geometrically spaced times. This modification improves the computational-cost to almost linear in  $\tau_\delta$ , while its sample complexity is optimal up to a multiplicative constant depending on the choice of geometrical-spacing factor, thus providing a controlled trade-off between the two costs. Recently, [3] propose a similar yet different “doubling” trick in the regret-minimization setting. However, our approach differs from theirs in that our update-times for weights are not random. We refer the reader to Appendix K for details of the algorithm and proofs for its theoretical guarantees.

**Mean-CVaR problem:** We now extend the methodology for the CVaR problem to the more general mean-CVaR problem. For a distribution  $\eta \in \mathcal{L}$  (for example, a random loss in a financial investment), the metric associated with the “badness” of a distribution is  $\alpha_1 m(\eta) + \alpha_2 c_\pi(\eta)$ , for  $\alpha_1 > 0$  and  $\alpha_2 > 0$ , and the best-arm is the one with minimum value of this conic combination of mean and CVaR. For  $\alpha_1 = 0$  this is the CVaR-problem, which we have studied in this work. For  $\alpha_2 = 0$ , this is the mean-problem, extensively studied in [2, 27].

As in (1), we can define corresponding KL-projection functionals, with the CVaR constraints replaced with those on the modified metric. The above theory, with this updated  $\text{KL}_{\text{inf}}^L$  and  $\text{KL}_{\text{inf}}^U$ , gives the corresponding results for this setting. In particular, the lower bound on  $\mathbb{E}(\tau_\delta)$  for  $\delta$ -correct algorithms for mean-CVaR BAI is given by  $V(\mu)^{-1} \log \frac{1}{4\delta}$ , where  $V(\mu)$  is defined in (5) with the updated  $\text{KL}_{\text{inf}}^U$  and  $\text{KL}_{\text{inf}}^L$ .

**Theorem 4.3 (Informal).** *For  $\mu \in \mathcal{M}^o$ , the proposed algorithm for CVaR, with  $\text{KL}_{\text{inf}}^U$  and  $\text{KL}_{\text{inf}}^L$  defined with mean-CVaR constraints instead, is  $\delta$ -correct and asymptotically optimal.*

The proof of this theorem parallels that for CVaR above. We give the formal statement with proof-details in Appendix I.

## 4.2 The VaR problem

In this section we present the main ideas for an analogous approach for the optimum VaR-problem. Here, we will not impose any conditions (viz. membership in  $\mathcal{L}$ ) on the arm-distributions, as the VaR lower bound is defined without it, i.e., arm distributions are allowed to be arbitrary probability measures on  $\mathfrak{R}$ . For a probability measure  $\eta$ , let  $F_\eta(y)$ , denote its CDF evaluated at  $y$  and  $F_\eta^-(y) = \lim_{z \uparrow y} F_\eta(z)$  denote the left limit of the CDF. Moreover, for  $r, q \in (0, 1)$  let  $d_2(r, q)$  denote the KL divergence between the Bernoulli random variables with mean  $r$  and  $q$ . For  $y \in \mathfrak{R}$ , let  $\text{KL}_{\text{inf}}^L(\eta, y)$  and  $\text{KL}_{\text{inf}}^U(\eta, y)$  be defined as in (1), with VaR constraints, instead. These simplify as follows.

**Lemma 4.4.**  $\text{KL}_{\text{inf}}^L(\eta, y) = d_2(\min\{F_\eta(y), \pi\}, \pi)$  and  $\text{KL}_{\text{inf}}^U(\eta, y) = d_2(\max\{F_\eta^-(y), \pi\}, \pi)$ .

Unlike in the CVaR-problem, we show that  $\text{KL}_{\text{inf}}^L$  and  $\text{KL}_{\text{inf}}^U$  for the VaR problem are not jointly continuous functionals (see Remark H.2). The discontinuity occurs at  $y$  being the jump points of  $F_\eta$  in Lemma 4.4 above. However, we prove in Appendix H (Corollary H.3.1) that the set of optimal proportions,  $t^*$ , is still upper-hemicontinuous and convex.

The algorithm for CVaR with  $\text{KL}_{\text{inf}}^U$  and  $\text{KL}_{\text{inf}}^L$  replaced by those in the lemma above, and setting

$$\beta(t, \delta) = 6 \log \left( 1 + \log \frac{t}{2} \right) + \log \frac{K-1}{\delta} + 8 \log \left( 1 + \log \frac{K-1}{\delta} \right),$$

we get our algorithm for the VaR-problem.

**Theorem 4.5 (Informal).** *The proposed algorithm for the VaR-problem is  $\delta$ -correct and asymptotically optimal.*

We refer the reader to Appendix H for a detailed discussion of the VaR-problem and proofs.

### 4.3 Tight $\text{KL}_{\text{inf}}$ -based confidence intervals for CVaR

We now present tight anytime-valid confidence interval for the CVaR of a distribution in  $\mathcal{L}$ . Let  $\hat{\eta}_n$  denote the empirical distribution corresponding to  $n$  samples from  $\eta \in \mathcal{L}$ . Our proposed upper ( $U_n$ ) and lower ( $L_n$ ) confidence intervals for  $c_\pi(\eta)$  are of the form  $U_n = \max \{x \in \mathbb{R} : n \text{KL}_{\text{inf}}^U(\hat{\eta}_n, x) \leq C\}$  and  $L_n = \min \{x \in \mathbb{R} : n \text{KL}_{\text{inf}}^L(\hat{\eta}_n, x) \leq C\}$ , for an appropriately chosen threshold  $C \approx \log \delta^{-1} + 3 \log n$ . Similar confidence intervals for the mean of heavy-tailed distributions were proposed in [3]. Let  $\hat{x}_{\pi,n}$  denote the  $\pi^{\text{th}}$  quantile for  $\hat{\eta}_n$ . Recall that the popular truncation-based estimator for  $c_\pi(\eta)$  is given by  $\hat{c}_{\pi,n} = n^{-1}(1-\pi)^{-1} \sum_i X_i \mathbb{1}(\hat{x}_{\pi,n} \leq X_i \leq u_n)$ , for appropriately chosen truncation levels,  $u_n$  (see, [39]). Observe that there are 2 sources of error in this estimator, first, the estimation of the quantile, and second, the estimation of the tail-expectation. On the other hand, our confidence intervals do not rely on estimation of the true quantile,  $x_\pi$ . In Appendix J, we show that even given the correct estimation of  $\hat{x}_{\pi,n}$ , confidence intervals for  $\hat{c}_{\pi,n}$  perform poorly compared to those based on  $\text{KL}_{\text{inf}}^U$  and  $\text{KL}_{\text{inf}}^L$ , in some applications.

### 4.4 Numerical Results

This is only a brief teaser section on the experiments, which are detailed in Appendix L. We are interested in the question whether the asymptotic sample complexity result of Theorem 4.1 is representative at reasonable confidence levels  $\delta$ . Whether this is the case or not differs greatly between pure exploration setups: [27] see state-of-the-art numerical results in Bernoulli arms for Track-and-Stop with  $\delta = 0.1$ , while [22] present a Minimum Threshold problem instance where the Track-and-Stop asymptotics have not kicked in yet at  $\delta = 10^{-20}$ . Our experiments confirm that our approach is indeed practical at moderate confidence  $\delta$ .

In our experiments we implement a version of Track-and-Stop including C-tracking and forced exploration and apply it to Fisher-Tippett ( $F(\mu, \sigma, \gamma)$ ), Pareto ( $P(\mu, \sigma, \gamma)$ ), and mixtures of Fisher-Tippett arms (these heavy-tailed distributions arise in extreme value theory).

Figure 1 shows the distribution of the stopping time as a function of  $\delta$  in a synthetic three-arm task: arm 1 is a uniform mixture of  $F(-1, 0.5, 0.4)$  and  $F(-3, 0.5, -0.4)$ , arm 2 is  $P(0, 0.2, 0.55)$  and arm 3 is  $F(-0.5, 1, 0.1)$  with respective CVaRs at quantile  $\pi = 0.6$  being  $-0.1428$ ,  $0.974$  and  $1.547$ . We select  $\epsilon = 0.7$  and  $B = 4.5$ . This is a moderately hard problem of complexity  $V^{-1}(\mu) = 49.7$ . We conclude that even at moderate  $\delta$  the average sample complexity closely matches the lower bound, especially after adjusting it for the lower-order terms in the employed stopping threshold  $\beta(n, \delta)$ . This demonstrates that our asymptotic optimality is in fact indicative of the performance in practice.

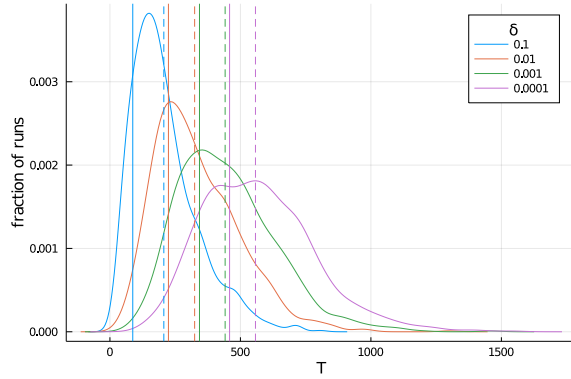

Figure 1: Histogram of stopping times among 1000 runs on 3 arms, as a function of confidence  $\delta$ . Vertical bars (solid) indicate the lower bound (4), and (dashed) a version adjusted to our stopping threshold (7), i.e., the  $n$  that solves  $n = \beta(n, \delta)V(\mu)^{-1}$ .

We do additional experiments to show the dependence of the algorithm's performance on the number of arms and the input parameter  $B$ . We see that the average stopping time of our algorithm increases linearly in the number of arms. Moreover, the sample complexity is sensitive to  $B$ , indicating the importance of correctly estimating it. We refer to Appendix L for details of these experiments.

**Conclusion:** We developed asymptotically optimal algorithms that identify the arm with the minimum risk, measured in terms of CVaR, VaR, or a conic combination of mean and CVaR. Our algorithms operate in non-parametric settings with possibly heavy-tailed distributions. Although similar plug-and-play algorithms have been developed in simpler settings, our algorithms for tail-risk measures require more nuanced analysis. The techniques developed may be generalizable to a much broader class of problems.

## Acknowledgments and Disclosure of Funding

We acknowledge the support of the Department of Atomic Energy, Government of India, to TIFR under project no. RTI4001.

## References

- [1] S. Agrawal and N. Goyal. Further optimal regret bounds for thompson sampling. In *Artificial intelligence and statistics*, pages 99–107. PMLR, 2013.
- [2] S. Agrawal, S. Juneja, and P. Glynn. Optimal  $\delta$ -correct best-arm selection for heavy-tailed distributions. In *Proceedings of the 31st International Conference on Algorithmic Learning Theory*, volume 117 of *Proceedings of Machine Learning Research*, pages 61–110. PMLR, 08 Feb–11 Feb 2020.
- [3] S. Agrawal, S. K. Juneja, and W. M. Koolen. Regret minimization in heavy-tailed bandits. In *Proceedings of Thirty Fourth Conference on Learning Theory*, volume 134 of *Proceedings of Machine Learning Research*, pages 26–62. PMLR, 15–19 Aug 2021.
- [4] E. Arkan and J. Fichtinger. The risk-averse newsvendor problem under spectral risk measures: A classification with extensions. *European Journal of Operational Research*, 256(1):116–125, 2017.
- [5] P. Artzner, F. Delbaen, J.-M. Eber, and D. Heath. Coherent measures of risk. *Mathematical finance*, 9(3):203–228, 1999.
- [6] J.-Y. Audibert and S. Bubeck. Best arm identification in multi-armed bandits. In *COLT-23th Conference on Learning Theory-2010*, pages 13–p, 2010.
- [7] P. Auer, N. Cesa-Bianchi, and P. Fischer. Finite-time analysis of the multiarmed bandit problem. *Machine Learning*, 47(2):235–256, May 2002.
- [8] C. Berge. *Topological Spaces: Including a Treatment of Multi-valued Functions, Vector Spaces, and Convexity*. Dover books on mathematics. Dover Publications, 1997.
- [9] P. Billingsley. *Convergence of Probability Measures*. Wiley Series in Probability and Statistics. Wiley, 2013.
- [10] A. Blum and A. Kalai. Universal portfolios with and without transaction costs. In *Proceedings of the Tenth Annual Conference on Computational Learning Theory*, pages 309–313. ACM, 1997.
- [11] S. Boyd and L. Vandenberghe. *Convex optimization*. Cambridge university press, 2004.
- [12] S. Bubeck, N. Cesa-Bianchi, et al. Regret analysis of stochastic and nonstochastic multi-armed bandit problems. *Foundations and Trends® in Machine Learning*, 5(1):1–122, 2012.
- [13] S. Bubeck, N. Cesa-Bianchi, and G. Lugosi. Bandits with heavy tails. *IEEE Transactions on Information Theory*, 59(11):7711–7717, 2013.
- [14] S. Bubeck, R. Munos, and G. Stoltz. Pure exploration in finitely-armed and continuous-armed bandits. *Theor. Comput. Sci.*, 412(19):1832–1852, 2011.
- [15] A. N. Burnetas and M. N. Katehakis. Optimal adaptive policies for sequential allocation problems. *Advances in Applied Mathematics*, 17(2):122 – 142, 1996.
- [16] O. Cappé, A. Garivier, O.-A. Maillard, R. Munos, G. Stoltz, et al. Kullback–Leibler upper confidence bounds for optimal sequential allocation. *The Annals of Statistics*, 41(3):1516–1541, 2013.
- [17] H. Chernoff. Sequential design of experiments. *The Annals of Mathematical Statistics*, 30(3):755–770, 1959.

- [18] Y. David and N. Shimkin. Pure exploration for max-quantile bandits. In *Machine Learning and Knowledge Discovery in Databases*, pages 556–571. Springer International Publishing, 2016.
- [19] L. De Haan and A. Ferreira. *Extreme value theory: an introduction*. Springer Science & Business Media, 2007.
- [20] V. H. de la Pena, M. J. Klass, and T. L. Lai. Self-normalized processes: exponential inequalities, moment bounds and iterated logarithm laws. *Annals of probability*, pages 1902–1933, 2004.
- [21] R. Degenne and W. M. Koolen. Pure exploration with multiple correct answers. In *Advances in Neural Information Processing Systems 32*, pages 14591–14600, 2019.
- [22] R. Degenne, W. M. Koolen, and P. Ménard. Non-asymptotic pure exploration by solving games. In *Advances in Neural Information Processing Systems 32*, pages 14492–14501, 2019.
- [23] A. Dembo and O. Zeitouni. Large deviations techniques and applications. corrected reprint of the second (1998) edition. stochastic modelling and applied probability, 38, 2010.
- [24] E. Even-Dar, M. Kearns, and J. Wortman. Risk-sensitive online learning. In J. L. Balcázar, P. M. Long, and F. Stephan, editors, *Algorithmic Learning Theory*, pages 199–213, Berlin, Heidelberg, 2006. Springer Berlin Heidelberg.
- [25] E. Even-Dar, S. Mannor, and Y. Mansour. Action elimination and stopping conditions for the multi-armed bandit and reinforcement learning problems. *Journal of machine learning research*, 7(Jun):1079–1105, 2006.
- [26] V. Gabillon, M. Ghavamzadeh, and A. Lazaric. Best arm identification: A unified approach to fixed budget and fixed confidence. In *Advances in Neural Information Processing Systems*, pages 3212–3220, 2012.
- [27] A. Garivier and E. Kaufmann. Optimal best arm identification with fixed confidence. In *Conference on Learning Theory*, pages 998–1027, 2016.
- [28] P. W. Glynn, A. Zeevi, et al. Bounding stationary expectations of markov processes. In *Markov processes and related topics: a Festschrift for Thomas G. Kurtz*, pages 195–214. Institute of Mathematical Statistics, 2008.
- [29] E. Hazan, A. Agarwal, and S. Kale. Logarithmic regret algorithms for online convex optimization. *Mach. Learn.*, 69(2-3):169–192, 2007.
- [30] J. Honda and A. Takemura. Non-asymptotic analysis of a new bandit algorithm for semi-bounded rewards. *The Journal of Machine Learning Research*, 16(1):3721–3756, 2015.
- [31] L. J. Hong, Z. Hu, and G. Liu. Monte carlo methods for value-at-risk and conditional value-at-risk: a review. *ACM Transactions on Modeling and Computer Simulation (TOMACS)*, 24(4):1–37, 2014.
- [32] S. R. Howard and A. Ramdas. Sequential estimation of quantiles with applications to A/B-testing and best-arm identification. *arXiv preprint arXiv:1906.09712*, 2019.
- [33] K. Jamieson, M. Malloy, R. Nowak, and S. Bubeck. lil’UCB: An optimal exploration algorithm for multi-armed bandits. In *Conference on Learning Theory*, pages 423–439, 2014.
- [34] S. Juneja and S. Krishnasamy. Sample complexity of partition identification using multi-armed bandits. In *Proceedings of the Thirty-Second Conference on Learning Theory*, volume 99 of *Proceedings of Machine Learning Research*, pages 1824–1852. PMLR, 25–28 Jun 2019.
- [35] A. Kagrecha, J. Nair, and K. Jagannathan. Distribution oblivious, risk-aware algorithms for multi-armed bandits with unbounded rewards. In *Advances in Neural Information Processing Systems 32*, pages 11272–11281. Curran Associates, Inc., 2019.
- [36] S. Kalyanakrishnan, A. Tewari, P. Auer, and P. Stone. PAC subset selection in stochastic multi-armed bandits. In *ICML*, volume 12, pages 655–662, 2012.

- [37] E. Kaufmann, O. Cappé, and A. Garivier. On the complexity of best-arm identification in multi-armed bandit models. *The Journal of Machine Learning Research*, 17(1):1–42, 2016.
- [38] E. Kaufmann and W. M. Koolen. Mixture martingales revisited with applications to sequential tests and confidence intervals. *arXiv preprint arXiv:1811.11419*, 2018.
- [39] P. L.A., K. Jagannathan, and R. Kolla. Concentration bounds for CVaR estimation: The cases of light-tailed and heavy-tailed distributions. In H. D. III and A. Singh, editors, *Proceedings of the 37th International Conference on Machine Learning*, volume 119 of *Proceedings of Machine Learning Research*, pages 5577–5586. PMLR, 13–18 Jul 2020.
- [40] T. Lattimore and C. Szepesvári. *Bandit algorithms*. Cambridge University Press, 2020.
- [41] D. Luenberger. *Optimization by Vector Space Methods*. Series in Decision and Control. Wiley, 1969.
- [42] O.-A. Maillard. Robust risk-averse stochastic multi-armed bandits. In S. Jain, R. Munos, F. Stephan, and T. Zeugmann, editors, *Algorithmic Learning Theory*, pages 218–233, Berlin, Heidelberg, 2013. Springer Berlin Heidelberg.
- [43] S. Mannor and J. N. Tsitsiklis. The sample complexity of exploration in the multi-armed bandit problem. *Journal of Machine Learning Research*, 5(Jun):623–648, 2004.
- [44] H. Markowitz. Portfolio selection. *The Journal of Finance*, 7(1):77–91, 1952.
- [45] E. Posner. Random coding strategies for minimum entropy. *IEEE Transactions on Information Theory*, 21(4):388–391, 1975.
- [46] R. T. Rockafellar. Coherent approaches to risk in optimization under uncertainty. In *OR Tools and Applications: Glimpses of Future Technologies*, pages 38–61. Informs, 2007.
- [47] R. T. Rockafellar and S. Uryasev. Conditional value-at-risk for general loss distributions. *Journal of banking & finance*, 26(7):1443–1471, 2002.
- [48] R. T. Rockafellar, S. Uryasev, et al. Optimization of conditional value-at-risk. *Journal of risk*, 2:21–42, 2000.
- [49] A. Sani, A. Lazaric, and R. Munos. Risk-aversion in multi-armed bandits. In F. Pereira, C. J. C. Burges, L. Bottou, and K. Q. Weinberger, editors, *Advances in Neural Information Processing Systems*, volume 25. Curran Associates, Inc., 2012.
- [50] S. Sarykalin, G. Serraino, and S. Uryasev. Value-at-risk vs. conditional value-at-risk in risk management and optimization. In *State-of-the-art decision-making tools in the information-intensive age*, pages 270–294. Informs, 2008.
- [51] T. Sawik. Optimization of cost and service level in the presence of supply chain disruption risks: Single vs. multiple sourcing. *Computers and Operations Research*, 51:11 – 20, 2014.
- [52] R. K. Sundaram. *A First Course in Optimization Theory*. Cambridge University Press, 1996.
- [53] W. R. Thompson. On the likelihood that one unknown probability exceeds another in view of the evidence of two samples. *Biometrika*, 25(3/4):285–294, 1933.
- [54] H. Victor et al. A general class of exponential inequalities for martingales and ratios. *Annals of probability*, 27(1):537–564, 1999.
- [55] J. Ville. Etude critique de la notion de collectif. *Bull. Amer. Math. Soc*, 45(11):824, 1939.
- [56] M. K. Warmuth and D. Kuzmin. Online variance minimization. In G. Lugosi and H. U. Simon, editors, *Learning Theory*, pages 514–528, Berlin, Heidelberg, 2006. Springer Berlin Heidelberg.
- [57] D. Williams. *Probability with martingales*. Cambridge university press, 1991.
- [58] R. C. Williamson and A. K. Menon. Fairness risk measures. *arXiv preprint arXiv:1901.08665*, 2019.
- [59] J. Y. Yu and E. Nikolova. Sample complexity of risk-averse bandit-arm selection. In *Twenty-Third International Joint Conference on Artificial Intelligence*, 2013.

## Checklist

1. For all authors...
  - (a) Do the main claims made in the abstract and introduction accurately reflect the paper's contributions and scope? [\[Yes\]](#)
  - (b) Did you describe the limitations of your work? [\[Yes\]](#) , See Section 1.
  - (c) Did you discuss any potential negative societal impacts of your work? [\[N/A\]](#)
  - (d) Have you read the ethics review guidelines and ensured that your paper conforms to them? [\[Yes\]](#)
2. If you are including theoretical results...
  - (a) Did you state the full set of assumptions of all theoretical results? [\[Yes\]](#)
  - (b) Did you include complete proofs of all theoretical results? [\[Yes\]](#)
3. If you ran experiments...
  - (a) Did you include the code, data, and instructions needed to reproduce the main experimental results (either in the supplemental material or as a URL)? [\[Yes\]](#)
  - (b) Did you specify all the training details (e.g., data splits, hyperparameters, how they were chosen)? [\[N/A\]](#)
  - (c) Did you report error bars (e.g., with respect to the random seed after running experiments multiple times)? [\[No\]](#) , instead we provide full histograms in Figures 1 and 2a.
  - (d) Did you include the total amount of compute and the type of resources used (e.g., type of GPUs, internal cluster, or cloud provider)? [\[No\]](#)
4. If you are using existing assets (e.g., code, data, models) or curating/releasing new assets...
  - (a) If your work uses existing assets, did you cite the creators? [\[N/A\]](#)
  - (b) Did you mention the license of the assets? [\[N/A\]](#)
  - (c) Did you include any new assets either in the supplemental material or as a URL? [\[N/A\]](#)
  - (d) Did you discuss whether and how consent was obtained from people whose data you're using/curating? [\[N/A\]](#)
  - (e) Did you discuss whether the data you are using/curating contains personally identifiable information or offensive content? [\[N/A\]](#)
5. If you used crowdsourcing or conducted research with human subjects...
  - (a) Did you include the full text of instructions given to participants and screenshots, if applicable? [\[N/A\]](#)
  - (b) Did you describe any potential participant risks, with links to Institutional Review Board (IRB) approvals, if applicable? [\[N/A\]](#)
  - (c) Did you include the estimated hourly wage paid to participants and the total amount spent on participant compensation? [\[N/A\]](#)

## A Equivalence in canonical SPEF setting

In this section, we will show that  $x_\pi(\eta_\theta)$  and  $c_\pi(\eta_\theta)$  are monotonic functions of  $\theta$  when  $\eta_\theta$  belongs to a canonical SPEF with parameter  $\theta$ , as is the mean. Thus, the problem of identifying the best-(CVaR/VaR/mean-CVaR) arm in this setting, is equivalent to identifying the arm with minimum mean.

Let  $\nu$  be the reference measure on  $\mathfrak{R}$  for the SPEF, and  $\Theta \subset \mathfrak{R}$  be the parameter space, i.e.,  $\Theta = \{\theta \in \mathfrak{R} : \int_{\mathfrak{R}} \exp(\theta y) d\nu(y) < \infty\}$ . Then, for  $\eta_\theta$  in the SPEF, for  $y \in \mathfrak{R}$ ,  $(d\eta_\theta/d\nu)(y) = \exp\{\theta y - A(\theta)\}$ , where  $A(\theta)$  is the normalizing factor. By direct computation, it can be verified that  $A'(\theta)$  equals the mean, and  $A''(\theta)$  equals the variance of  $\eta_\theta$ . Hence, mean is an increasing function of  $\theta$  ([16]).

Next, for  $a \in \mathfrak{R}$ , define  $\bar{F}_\theta(a) = \int_{y \geq a} d\eta_\theta(y)$  to be the tail-CDF of  $\eta_\theta$ . Clearly,  $\bar{F}_\theta(a)$  increases on increasing  $\theta$  since  $d\bar{F}_\theta(a)/d\theta = \bar{F}_\theta(a) (\mathbb{E}_{\eta_\theta}(X|X \geq a) - m(\eta_\theta))$ , which is positive. The fact that  $x_\pi(\eta_\theta)$  is a non-decreasing function of  $\theta$  now follows from its definition. From (2), we see that  $c_\pi(\eta_\theta)$  is non-decreasing in  $\theta$ .

## B Bounds on CVaR and VaR for distributions in $\mathcal{L}$ : Proof of Lemma 2.1

We first recall the definitions and different representations of CVaR, which will be useful in this section. Given a probability measure  $\kappa$ , let  $x_\pi(\kappa)$  and  $c_\pi(\kappa)$  denote its VaR and CVaR at level  $\pi$ . Then, recall that

$$\begin{aligned} c_\pi(\kappa) &= \frac{F(x_\pi(\kappa)) - \pi}{1 - \pi} x_\pi(\kappa) + \frac{1}{1 - \pi} \int_{\mathfrak{R}} (y - x_\pi(\kappa))_+ d\kappa(y) \\ &= \min_{z \in \mathfrak{R}} \left\{ z + \frac{1}{1 - \pi} \mathbb{E}_\kappa((X - z)_+) \right\}, \end{aligned}$$

where the infimum of the set of minimizers in the second representation, is VaR at level  $\pi$  for  $\kappa$ .

Consider a probability measure  $\eta \in \mathcal{L}$ . Recall that for  $\epsilon > 0$ ,  $\mathcal{L} = \{\eta \in \mathcal{P}(\mathfrak{R}) : \mathbb{E}_\eta(f(X)) \leq B\}$ , where  $f(y) = |y|^{1+\epsilon}$ , and

$$C = [-f^{-1}(B\pi^{-1}), f^{-1}(B(1-\pi)^{-1})] \quad \text{and} \quad D = [-f^{-1}(B), f^{-1}(B(1-\pi)^{-1})].$$

Let  $x_\pi^-(\eta) < x_\pi(\eta)$ . Then for  $x_\pi(\eta) < 0$ ,

$$\pi \leq \int_{-\infty}^{x_\pi^-(\eta)} d\eta(y) = \int_{-\infty}^{x_\pi^-(\eta)} \frac{f(y)}{f(y)} d\eta(y) \leq \int_{-\infty}^{x_\pi^-(\eta)} \frac{f(y)}{f(x_\pi(\eta))} d\eta(y) \leq \frac{B}{f(x_\pi(\eta))},$$

and for  $x_\pi(\eta) \geq 0$ ,

$$1 - \pi \leq \int_{x_\pi^-(\eta)}^{\infty} d\eta(y) = \int_{x_\pi^-(\eta)}^{\infty} \frac{f(y)}{f(y)} d\eta(y) \leq \int_{x_\pi^-(\eta)}^{\infty} \frac{f(y)}{f(x_\pi(\eta))} d\eta(y) \leq \frac{B}{f(x_\pi(\eta))}.$$

Combining the two, we get  $-f^{-1}(B\pi^{-1}) \leq x_\pi(\eta) \leq f^{-1}(B(1-\pi)^{-1})$ , where  $f^{-1}(c)$  is defined as  $\max\{y : f(y) = c\}$ , which equals  $c^{\frac{1}{1+\epsilon}}$ . To get a bound on  $c_\pi(\eta)$ , consider the following inequalities.

$$\begin{aligned} B &\geq \mathbb{E}_\eta(f(X)) \geq (F(x_\pi(\eta)) - \pi) f(x_\pi(\eta)) + \int_{x_\pi(\eta)}^{\infty} f(y) d\eta(y) \\ &= (1 - \pi) \left( \frac{F(x_\pi(\eta)) - \pi}{1 - \pi} f(x_\pi(\eta)) + \frac{1}{1 - \pi} \int_{x_\pi(\eta)}^{\infty} f(y) d\eta(y) \right), \end{aligned}$$

where the first inequality follows since  $\eta$  is in  $\mathcal{L}$ , and the second follows since  $f$  is non-negative. Furthermore, since  $f$  is convex, using conditional Jensen's inequality, the above can be bounded from below by

$$(1 - \pi) f \left( \frac{F(x_\pi(\eta)) - \pi}{1 - \pi} x_\pi(\eta) + \frac{1}{1 - \pi} \int_{x_\pi(\eta)}^{\infty} y d\eta(y) \right),$$

which is  $(1-\pi)f(c_\pi(\eta))$ . Thus we have,  $-f^{-1}(B(1-\pi)^{-1}) \leq c_\pi(\eta) \leq f^{-1}(B(1-\pi)^{-1})$ . However, the lower bound for  $c_\pi(\eta)$  obtained above can be further tightened. Recall that

$$\min_{\eta \in \mathcal{L}} c_\pi(\eta) = \min_{z \in C} \min_{\eta \in \mathcal{L}} \left\{ z + \frac{1}{1-\pi} \mathbb{E}_\eta((X-z)_+) \right\}.$$

In the inner minimization problem in r.h.s. above, the objective is minimizing expectation under  $\eta$  of convex functions of  $X$ , under the constraint that expectation under  $\eta$  of a convex function being smaller than  $B$ . Thus, the minimizer concentrates at a single point, i.e., the minimizer  $\eta = \delta_x$ , for some  $x \in \mathfrak{R}$  such that  $f(x) \leq B$ . Thus, the above problem equals

$$\min_{z \in C} \min_{x \in [-f^{-1}(B), f^{-1}(B)]} \left\{ z + \frac{1}{1-\pi} (x-z)_+ \right\},$$

which is increasing in  $x$ . Thus, at optimal  $x = -f^{-1}(B)$ , it equals

$$\min_{z \in C} \max \left\{ z, \frac{-f^{-1}(B) - \pi z}{1-\pi} \right\}.$$

Clearly, the minimum is attained at  $z = -f^{-1}(B)$ , with the optimal value being  $-f^{-1}(B)$ . Combining with the previous bounds on  $c_\pi(\eta)$ , we have that for  $\eta \in \mathcal{L}$ ,  $c_\pi(\eta) \in D$ .

### C Details of proofs in Section 3

We first review some notation that will be useful in this section. Recall that for a non-negative constant  $B$ , arm distributions belong to class  $\mathcal{L}$  which equals  $\{\eta \in \mathcal{P}(\mathfrak{R}) : \mathbb{E}_\eta(f(X)) \leq B\}$ , where  $f(x) = |x|^{1+\epsilon}$ , for some  $\epsilon > 0$ . Define  $f^{-1}(c) = \max\{y : f(y) = c\} = c^{\frac{1}{1+\epsilon}}$ .

We denote by  $\mathcal{M}$  the collection of all  $K$ -vectors of distributions, each belonging to  $\mathcal{L}$  and by  $\mathcal{A}_j$  the collection of vectors in  $\mathcal{M}$  with arm  $j$  having the minimum CVaR. Furthermore, for  $\eta \in \mathcal{P}(\mathfrak{R})$  and  $\pi \in (0, 1)$ ,  $c_\pi(\eta)$  and  $x_\pi(\eta)$  denote the CVaR and VaR at confidence level  $\pi$ , for measure  $\eta$ . Also, for  $x \in \mathfrak{R}$ , we define the KL projection functionals

$$\text{KL}_{\inf}^U(\eta, x) := \inf_{\kappa \in \mathcal{L}: c_\pi(\kappa) \geq x} \text{KL}(\eta, \kappa) \quad \text{and} \quad \text{KL}_{\inf}^L(\eta, x) = \inf_{\kappa \in \mathcal{L}: c_\pi(\kappa) \leq x} \text{KL}(\eta, \kappa).$$

Furthermore, recall that

$$D = [-f^{-1}(B), f^{-1}(B(1-\pi)^{-1})] \quad \text{and} \quad C = [-f^{-1}(B\pi^{-1}), f^{-1}(B(1-\pi)^{-1})],$$

and  $D^\circ$  and  $C^\circ$  denote the interior of sets  $D$  and  $C$ , respectively. For  $v \in D^\circ$ ,  $x_0 \in C$ ,  $\lambda \in \mathfrak{R}^3$ ,  $\gamma \in \mathfrak{R}^2$ , and  $X \in \mathfrak{R}$ ,

$$g^U(X, \lambda, v) := 1 + \lambda_1 v - \lambda_2(1-\pi) + \lambda_3(f(X) - B) - \left( \frac{\lambda_1 X}{1-\pi} - \lambda_2 \right)_+, \quad (9)$$

and

$$g^L(X, \gamma, v, x_0) := 1 - \gamma_1 \left( v - x_0 - \frac{(X - x_0)_+}{1-\pi} \right) - \gamma_2(B - f(X)). \quad (10)$$

Furthermore,

$$\hat{S}(v) := \{\lambda_1 \geq 0, \lambda_2 \in \mathfrak{R}, \lambda_3 \geq 0 : \forall x \in \mathfrak{R}, g^U(x, \lambda, v) \geq 0\}, \quad (11)$$

and

$$\mathcal{R}_2(x_0, v) := \{\gamma_1 \geq 0, \gamma_2 \geq 0, \forall y \in \mathfrak{R}, g^L(y, \gamma, x_0, v) \geq 0\}. \quad (12)$$

Later, in Theorem 3.4 we show that for  $\eta \in \mathcal{P}(\mathfrak{R})$ ,

$$\text{KL}_{\inf}^U(\eta, v) = \max_{\lambda \in \hat{S}(v)} \mathbb{E}_\eta(\log(g^U(X, \lambda, v)))$$

and

$$\text{KL}_{\inf}^L(\eta, v) = \min_{x_0 \in C} \max_{\gamma \in \mathcal{R}_2(x_0, v)} \mathbb{E}_\eta(\log(g^L(X, \gamma, x_0, v))).$$

### C.1 Proof of Lemma 3.1

Recall that arm 1 is the arm with minimum CVaR in  $\mu$ , and  $V(\mu) = \sup_{t \in \Sigma_K} \inf_{\nu \in \mathcal{A}_1^c} \sum_{i=1}^K t_i \text{KL}(\mu_i, \nu_i)$ , where  $\mathcal{A}_1^c = \mathcal{M} \setminus \mathcal{A}_1$ . Clearly, the inner optimization problem satisfies

$$\inf_{\nu \in \mathcal{A}_1^c} \sum_{i=1}^K t_i \text{KL}(\mu_i, \nu_i) = \min_{j \neq 1} \inf_{\nu \in \mathcal{A}_j} \sum_{i=1}^K t_i \text{KL}(\mu_i, \nu_i). \quad (13)$$

Next, for  $\mu \in \mathcal{M}$  the infimum in the expression in r.h.s. above is attained by  $\nu \in \mathcal{A}_j$  such that  $\nu_i = \mu_i$  for all arms  $i$  not in  $\{1, j\}$ , as otherwise, the value of the summation can be decreased by setting them equal to  $\mu_i$ . Thus,

$$\inf_{\nu \in \mathcal{A}_j} \sum_{i=1}^K t_i \text{KL}(\mu_i, \nu_i) = \inf_{\substack{\nu_1, \nu_j \in \mathcal{L}, x \leq y, \\ c_\pi(\nu_j) \leq x, c_\pi(\nu_1) \geq y}} \{t_1 \text{KL}(\mu_1, \nu_1) + t_j \text{KL}(\mu_j, \nu_j)\}.$$

Now, from the definition of  $\text{KL}_{\inf}^L$  and  $\text{KL}_{\inf}^U$ , the r.h.s. in above equation equals

$$\inf_{x \leq y} \{t_1 \text{KL}_{\inf}^U(\mu_1, y) + t_j \text{KL}_{\inf}^L(\mu_j, x)\}.$$

Combining this with (13) gives the desired result.  $\square$

### C.2 Towards proving Lemma 3.2: Continuity of the KL-projection functionals

We first establish the properties of  $\mathcal{L}$  stated in the Lemma.

**Uniform integrability of  $\mathcal{L}$ :** Since each probability measure  $\eta$  in  $\mathcal{L}$  has a uniformly bounded  $p^{th}$  moment for a fixed  $p > 1$ , their Skorokhod transforms  $\{u \mapsto F_\eta^{-1}(u) \mid \eta \in \mathcal{L}\}$  form a uniformly integrable collection ([57]).

**Compactness of  $\mathcal{L}$ :** It is sufficient to show that  $\mathcal{L}$  is closed and tight. Prohorov's Theorem then gives that it is a compact set in the topology of weak convergence ([9]). We first show that it is a closed set. Towards this, consider a sequence  $\eta_n$  of probability measures in  $\mathcal{L}$ , converging weakly to  $\eta \in \mathcal{P}(\mathbb{R})$ . By Skorokhod's Representation Theorem (see, [9]), there exist random variables  $Y_n, Y$  defined on a common probability space, say  $(\Omega, \mathcal{F}, q)$ , such that  $Y_n \sim \eta_n$ ,  $Y \sim \eta$ , and  $Y_n \xrightarrow{a.s.} Y$ . Then, by Fatou's Lemma,

$$\mathbb{E}_\eta(|X|^{1+\epsilon}) = \mathbb{E}_q(|Y|^{1+\epsilon}) = \mathbb{E}_q\left(\liminf_{n \rightarrow \infty} |Y_n|^{1+\epsilon}\right) \leq \liminf_{n \rightarrow \infty} \mathbb{E}_q(|Y_n|^{1+\epsilon}) \leq B.$$

Hence,  $\eta$  is in  $\mathcal{L}$  and the class is closed in the weak topology. To see that it is tight, consider  $K_\epsilon := \left[-(2B\epsilon^{-1})^{\frac{1}{1+\epsilon}}, (2B\epsilon^{-1})^{\frac{1}{1+\epsilon}}\right]$ . For  $\eta \in \mathcal{L}$ ,  $\eta(K_\epsilon^c) \leq \epsilon$ .

**Convexity of  $\text{KL}_{\inf}^U(\cdot, x)$ :** Consider two measures,  $\eta_1, \eta_2$  in  $\mathcal{L}$ , and let  $\lambda \in (0, 1)$ . Let  $\kappa_1$  be such that  $\text{KL}_{\inf}^U(\eta_1, x) = \text{KL}(\eta_1, \kappa_1)$ . Existence of  $\kappa_1$  is guaranteed by continuity of  $\text{KL}_{\inf}^U$  in its arguments, and compactness of the domain of optimization, which follows from Lemma C.2 below. Similarly, let  $\kappa_2$  satisfy  $\text{KL}_{\inf}(\eta_2, x) = \text{KL}(\eta_2, \kappa_2)$ . Let

$$\eta_{12} = \lambda\eta_1 + (1 - \lambda)\eta_2, \quad \text{and} \quad \kappa_{12} = \lambda\kappa_1 + (1 - \lambda)\kappa_2.$$

Clearly,  $\kappa_{12}$  is in  $\mathcal{L}$ . Moreover, by concavity of  $c_\pi(\cdot)$ ,  $c_\pi(\kappa_{12}) \geq \lambda c_\pi(\kappa_1) + (1 - \lambda)c_\pi(\kappa_2)$ . Then,  $\text{KL}_{\inf}^U(\eta_{12}, x)$  is at most  $\text{KL}(\eta_{12}, \kappa_{12})$ , which, by joint convexity of  $\text{KL}$ , is bounded by  $\lambda \text{KL}(\eta_1, \kappa_1) + (1 - \lambda) \text{KL}(\eta_2, \kappa_2)$ . This bound then equals  $\lambda \text{KL}_{\inf}^U(\eta_1, x) + (1 - \lambda) \text{KL}_{\inf}(\eta_2, x)$ .

**Joint continuity of  $\text{KL}_{\inf}^U$  and  $\text{KL}_{\inf}^L$ :** We show upper- and lower-semicontinuity separately for the KL projection functionals restricted to  $\mathcal{L}$  (see Lemmas C.3, C.4, and C.5). The following results will assist in the proofs of these.

**Lemma C.1.** For  $\eta_n$  and  $\eta \in \mathcal{L}$ ,  $c_\pi(\eta_n) \xrightarrow{D} c_\pi(\eta)$  whenever  $\eta_n \xrightarrow{D} \eta$ .

*Proof.* Consider a sequence  $\eta_n \in \mathcal{L}$  weakly converging to  $\eta \in \mathcal{L}$ . Then, there exist random variables  $Y_n, Y$  defined on a common probability space  $(\Omega, \mathcal{F}, q)$  such that  $Y_n \sim \eta_n, Y \sim \eta$ , and  $Y_n \xrightarrow{a.s.} Y$  (Skorohod's Theorem, see, [9]). Furthermore, since  $\eta_n, \eta$  are uniformly integrable,  $\mathbb{E}_q(|Y_n|) \rightarrow \mathbb{E}_q(|Y|)$  (see, [57, Theorem 13.7])

Consider a sequence of real numbers  $z_n \rightarrow z$ . Then,  $Y_n - z_n \xrightarrow{a.s.} Y - z$ , whence  $(Y_n - z_n)_+ \xrightarrow{a.s.} (Y - z)_+$ . Clearly,

$$(Y_n - z_n)_+ \leq |Y_n| + |z_n|, \quad |Y_n| + |z_n| \xrightarrow{a.s.} |Y| + |z| \quad \text{and} \quad \mathbb{E}_q(|Y_n|) + |z_n| \rightarrow \mathbb{E}_q(|Y|) + |z| < \infty.$$

Then, by generalized Dominated Convergence Theorem,  $\mathbb{E}_q((Y_n - z_n)_+) \rightarrow \mathbb{E}_q((Y - z)_+)$ . Now, for  $\eta \in \mathcal{L}$ ,  $c_\pi(\eta)$  equals

$$\min_{z \in C} g(z, \eta), \quad \text{where} \quad g(z, \eta) = z + \frac{1}{1 - \pi} \mathbb{E}_\eta((X - z)_+).$$

From the above discussion,  $g(z, \eta)$  restricted to  $C \times \mathcal{L}$ , is a jointly continuous function. Berge's Theorem ([8, Maximum Theorem, Page 116]) then gives the desired result.  $\square$

**Lemma C.2.** *The sets  $\mathcal{D}_v^L \triangleq \{\eta \in \mathcal{L} : c_\pi(\eta) \leq v\}$  and  $\mathcal{D}_v^U \triangleq \{\eta \in \mathcal{L} : c_\pi(\eta) \geq v\}$  are compact sets in the topology of weak convergence.*

*Proof.* Since  $\mathcal{L}$  is compact, it is sufficient to show that the sets  $\mathcal{D}_v^L$  and  $\mathcal{D}_v^U$  are closed, which follows from Lemma C.1.  $\square$

**Lemma C.3.** *For  $\eta \in \mathcal{P}(\mathbb{R})$  and  $v \in D$ , the functionals  $\text{KL}_{\inf}^U(\eta, v)$  and  $\text{KL}_{\inf}^L(\eta, v)$  are jointly lower-semicontinuous in  $(\eta, v)$ .*

*Proof.* Recall that

$$\text{KL}_{\inf}^L(\eta, v) = \min_{\kappa \in \mathcal{L} : c_\pi(\kappa) \leq v} \text{KL}(\eta, \kappa) \quad \text{and} \quad \text{KL}_{\inf}^U(\eta, v) = \min_{\kappa \in \mathcal{L} : c_\pi(\kappa) \geq v} \text{KL}(\eta, \kappa).$$

For  $\eta, \kappa \in \mathcal{P}(\mathbb{R})$ ,  $\text{KL}(\eta, \kappa)$  is jointly lower-semicontinuous function in the topology of weak convergence (see, [45]) and a jointly lower-semicontinuous function of  $(\eta, \kappa, v)$ . Let  $D_v = \{\kappa \in \mathcal{L} : c_\pi(\kappa) \leq v\}$ . Since  $D_v$  is a compact set for each  $v$  (Lemma C.2), it is sufficient to show that  $D_v$  is an upper-hemicontinuous correspondence (see, [8, Theorem 1, Page 115]).

Consider a sequence  $v_n$  in  $D$ , converging to  $\tilde{v}$  in  $D$ . Let  $\eta_n \in D_{v_n}$ , which exist since  $D_{v_n}$  are non-empty sets. Since  $\mathcal{L}$  is a tight, and hence relatively compact collection of probability measures, and  $\eta_n \in \mathcal{L}$ ,  $\eta_n$  has a weakly convergent sub-sequence, say  $\eta_{n_i}$  converging to  $\eta \in \mathcal{L}$  (since  $\mathcal{L}$  is also closed). Furthermore,  $c_\pi(\eta_{n_i}) \leq v_{n_i}$ . From Lemma C.1,  $c_\pi(\eta) = \lim_{n_i} c_\pi(\eta_{n_i}) \leq \tilde{v}$ , which implies that  $\eta \in D_{\tilde{v}}$ , proving upper-hemicontinuity of the set  $D_v$  in  $v$  (see, [52, Proposition 9.8] for sequential characterization of upper-hemicontinuity).

Similar arguments hold for  $\text{KL}_{\inf}^L(\cdot, \cdot)$ .  $\square$

**Lemma C.4.**  *$\text{KL}_{\inf}^L$ , viewed as a function from  $\mathcal{L} \times \left(-f^{-1}(B), f^{-1}\left(\frac{B}{1-\pi}\right)\right]$ , is a jointly upper-semicontinuous function.*

*Proof.* Let

$$\underline{D} = \left(-f^{-1}(B), f^{-1}\left(\frac{B}{1-\pi}\right)\right] \quad \text{and} \quad C_v = \left[-f^{-1}\left(\frac{B}{\pi}\right), v\right].$$

We prove in Theorem 3.4(b) that for  $v \in \underline{D}$ ,  $\text{KL}_{\inf}^L(\eta, v) = \min_{x_0 \in C_v} h^*(x_0, v, \eta)$ , where for  $g^L$  and  $\mathcal{R}_2$  defined in (10) and (12) above,

$$h^*(x_0, v, \eta) := \max_{\gamma \in \mathcal{R}_2(x_0, v)} \mathbb{E}_\eta(\log g^L(X, \gamma, x_0, v)).$$

**Joint upper-semicontinuity for  $v > c_\pi(\eta)$ :** Observe that for  $\eta \in \mathcal{L}$  and  $v \geq c_\pi(\eta)$ ,  $\text{KL}_{\inf}^L(\eta, v) = 0$ . Consider a sequence  $(\eta_n, v_n)$  converging to  $(\eta, v)$ . Then,  $\exists n_0$  such that for all  $n \geq n_0$ ,  $c_\pi(\eta_n) \leq v_n$ . To see this, suppose not, i.e., for all  $n$ ,  $c_\pi(\eta_n) > v_n$ . Taking limits, this gives  $c_\pi(\eta) \geq v$ , which is a contradiction. Thus, for  $n \geq n_0$ ,  $\text{KL}_{\inf}^L(\eta_n, v_n) = 0$ , proving continuity in this case.

We next prove the joint upper-semicontinuity for  $v < c_\pi(\eta)$ , and handle the joint upper-semicontinuity at  $(\eta, c_\pi(\eta))$  separately.

**Joint upper-semicontinuity for  $v < c_\pi(\eta)$ :** It can be argued that for  $\eta \in \mathcal{L}$  and  $v < c_\pi(\eta)$ ,

$$\text{KL}_{\inf}^L(\eta, v) = \min_{x_0 \in C_v \setminus \{v\}} h^*(x_0, v, \eta). \quad (14)$$

To see this,  $v < c_\pi(\eta)$  implies that  $\eta \notin \mathcal{P}(\text{Supp}(-\infty, v])$  and from Lemma D.8 and the remark following it,  $h^*(v, v, \eta) = \infty$ , giving (14).

Clearly,  $C_v \setminus \{v\}$  is a lower-hemicontinuous correspondence. To show that  $\text{KL}_{\inf}^L$  is jointly upper-semicontinuous, it suffices to show that  $h^*(x_0, v, \eta)$  is jointly upper-semicontinuous ([8, Theorem 1, Page 115]).

**Joint upper-semicontinuity of  $h^*$ :** It follows from the definition that  $\mathcal{R}_2(x_0, v) \neq \emptyset$  as  $\mathbf{0} \in \mathcal{R}_2(x_0, v)$ , and for  $x_0 \neq v$ ,  $\mathcal{R}_2(x_0, v)$  is compact (Lemma D.8). Furthermore, suppose  $\mathcal{R}_2(x_0, v)$  is jointly upper-hemicontinuous correspondence, and for  $\gamma \in \mathcal{R}_2(x_0, v)$ ,  $\mathbb{E}_\eta(\log g^L(X, \gamma, x_0, v))$  is jointly upper-semicontinuous in  $(x_0, v, \eta, \gamma)$ , then  $h^*(x_0, v, \eta)$  is upper-semicontinuous ([8, Theorem 2, Page 116]). It then suffices to prove the following:

1. For  $x_0 \neq v$ ,  $\gamma \in \mathcal{R}_2(x_0, v)$ ,  $h(x_0, v, \eta, \gamma) = \mathbb{E}_\eta(\log g^L(X, \gamma, x_0, v))$  is a jointly upper-semicontinuous function.
2. For  $x_0 \in C_v \setminus \{v\}$  and  $v \in \underline{D}$ ,  $\mathcal{R}_2(x_0, v)$  is an upper-hemicontinuous correspondence.

**Proof of (1):** Consider a sequence  $(x_n, v_n, \eta_n, \gamma_n) \in C_{v_n} \times \underline{D} \times \mathcal{L} \times \mathcal{R}_2(x_n, v_n)$  converging to  $(x_0, v, \eta, \gamma) \in C_v \times \underline{D} \times \mathcal{L} \times \mathcal{R}_2(x_0, v)$ , where convergence is defined coordinate wise, and  $\eta_n$  converges to  $\eta$  in topology of weak convergence. It is sufficient to show that

$$\limsup_{n \rightarrow \infty} h(x_n, v_n, \eta_n, \gamma_n) \leq h(x_0, v, \eta, \gamma).$$

Since  $\eta_n \xrightarrow{D} \eta$ , by Skorokhod's Representation Theorem (see, [9]), there are random variables,  $Y_n, Y$  defined on a common probability space,  $(\Omega, \mathcal{F}, q)$ , such that  $Y_n \xrightarrow{a.s.} Y$  and  $Y_n \sim \eta_n$  and  $Y \sim \eta$ . Then,  $\log(g^L(Y_n, \gamma_n, x_n, v_n)) \xrightarrow{a.s.} \log(g^L(Y, \gamma, x_0, v))$ , and

$$h(x_n, v_n, \eta_n, \gamma_n) = \mathbb{E}_q(\log g^L(Y_n, \gamma_n, x_n, v_n)) \quad \text{and} \quad h(x_0, v, \eta, \gamma) = \mathbb{E}_q(\log g^L(Y, \gamma, x_0, v)).$$

Let

$$0 \leq Z_n \triangleq c_{1n} + c_{2n} |Y_n| + c_{3n} |Y_n|^{1+\epsilon},$$

where

$$c_{1n} = \gamma_{1n} (v_n - x_n) + \frac{\gamma_{1n} |x_n|}{1 - \pi} + \gamma_{2n} B, \quad c_{2n} = \frac{\gamma_{1n}}{1 - \pi}, \quad c_{3n} = \gamma_{2n}.$$

Clearly, each  $c_{in}$  converge to  $c_i < \infty$ . With these notation,  $\log(g^L(Y_n, \gamma_n, x_n, v_n))$  is bounded by  $\log(1 + Z_n)$ , and  $Z_n \xrightarrow{n \rightarrow \infty} Z$ . Thus, there exist  $c_{0n} \xrightarrow{n \rightarrow \infty} c_0 < \infty$  such that  $\log(1 + Z_n) \leq c_{0n} + |Z_n|^{1/(1+\epsilon)}$  and using the form of  $Z_n$  from above, there also exist constants  $c_{4n} \xrightarrow{n \rightarrow \infty} c_4$  and  $c_{5n} \xrightarrow{n \rightarrow \infty} c_5$  such that

$$|Z_n|^{1/(1+\epsilon)} \leq c_{4n} + c_{5n} |Y_n|.$$

Thus, there exist constants  $c_{0n}, c_{4n}, c_{5n}$  converging to  $c_0, c_4, c_5$  such that

$$\log(g^L(Y_n, \gamma_n, x_n, v_n)) \leq c_{0n} + c_{4n} + c_{5n} |Y_n| \triangleq f^L(Y_n, \gamma_n, x_n, v_n).$$

Furthermore,

$$f^L(Y_n, \gamma_n, x_n, v_n) \xrightarrow{a.s.} f^L(Y, \gamma, x_0, v) \quad \text{and} \quad \mathbb{E}_q(f^L(Y_n, \gamma_n, x_n, v_n)) \rightarrow \mathbb{E}_q(f^L(Y, \gamma, x_0, v)),$$

since  $\eta_n, \eta \in \mathcal{L}$  which is a collection of uniformly integrable measures (see, [57]). Since,  $f^L(Y_n, \gamma_n, x_n, v_n) - \log g^L(Y_n, \gamma_n, x_n, v_n) \geq 0$ , by Fatou's Lemma,

$$\begin{aligned} \mathbb{E}_q \left( \liminf_{n \rightarrow \infty} (f^L(Y_n, \gamma_n, x_n, v_n) - \log g^L(Y_n, \gamma_n, x_n, v_n)) \right) \\ \leq \mathbb{E}_q (f^L(Y, \gamma, x_0, v)) - \limsup_{n \rightarrow \infty} \mathbb{E}_q (\log g^L(Y_n, \gamma_n, x_n, v_n)), \end{aligned}$$

which implies

$$\begin{aligned} h(x_0, v, \eta, \gamma_n) = \mathbb{E}_q \left( \limsup_{n \rightarrow \infty} \log (g^L(Y_n, \gamma_n, x_n, v_n)) \right) &\geq \limsup_{n \rightarrow \infty} \mathbb{E}_q (\log (g^L(Y_n, \gamma_n, x_n, v_n))) \\ &= \limsup_{n \rightarrow \infty} h(x_n, v_n, \eta_n, \gamma_n). \end{aligned}$$

**Proof of (2):** Clearly,  $(0, 0) \in \mathcal{R}_2(x, v)$  for all  $x \in C_v$  and  $v \in \underline{D}$ . Next, consider a sequence  $(x_n, v_n) \rightarrow (x_0, v) \in C_v \times \underline{D}$  and a sequence  $\gamma_n \in \mathcal{R}_2(x_n, v_n)$ . Since  $(x_n, v_n) \rightarrow (x_0, v)$ , there exists a closed and bounded (compact) subset,  $K$ , of  $\mathbb{R} \times \mathbb{R}$  containing  $(x_0, v)$ , such that for some  $J \geq 1$ , and all  $n \geq J$ ,  $(x_n, v_n) \in K$ . Since  $\min_y g^L(y, \cdot, \cdot, \cdot)$  is a jointly continuous function, for  $n \geq J$ ,  $\gamma_n$  also belongs to a compact subset of  $\mathbb{R}$ . Bolzano-Weierstrass theorem then gives a convergent subsequence  $\{(x_{n_i}, v_{n_i}), \gamma_{n_i}\}$  in  $\mathbb{R}^3$  with the limit  $\{(x_0, v), \gamma\}$ . It is then sufficient to show that  $\gamma \in \mathcal{R}_2(x_0, v)$ , which follows since

$$g^L(y, \gamma_n, x_n, v_n) \geq 0 \Rightarrow g^L(y, \gamma, x_0, v) \geq 0,$$

proving that the correspondence  $\mathcal{R}_2(\cdot, \cdot)$  is upper-hemicontinuous (see, [52, Proposition 9.8]). This completes the proof for upper-semicontinuity of  $\text{KL}_{\text{inf}}^L(\eta, v)$  for  $v < c_\pi(\eta)$ .

**Joint upper-semicontinuity of  $\text{KL}_{\text{inf}}^L(\eta, c_\pi(\eta))$ :** Towards this, consider a sequence  $(\eta_n, v_n) \in \mathcal{L} \times \underline{D}$  converging to  $(\eta, c_\pi(\eta))$ , where the convergence is defined coordinate-wise and in the first coordinate it is in the Lévy metric. Without loss of generality, assume that  $v_n \leq c_\pi(\eta_n)$  for all  $n$ . It is then sufficient to argue that  $\text{KL}_{\text{inf}}^L(\eta_n, v_n) \xrightarrow{n \rightarrow \infty} 0$ .

We demonstrate a sequence of measures  $\kappa_n \in \mathcal{L}$  which are feasible to  $\text{KL}_{\text{inf}}^L(\eta_n, v_n)$  problem, such that  $\text{KL}(\eta_n, \kappa_n) \xrightarrow{n \rightarrow \infty} 0$ , whence  $\text{KL}_{\text{inf}}^L(\eta_n, v_n) \xrightarrow{n \rightarrow \infty} 0$ . Define

$$w_n = \frac{\mathbb{E}_{\eta_n} (X - z_n)_+ - (1 - \pi)(v_n - z_n)}{\mathbb{E}_{\eta_n} (X - z_n)_+} \quad \text{and} \quad \kappa_n = w_n \delta_{-f^{-1}(B) + z_n} + (1 - w_n) \eta_n,$$

where,

$$z_n = \begin{cases} x_\pi(\eta) - \frac{c_\pi(\eta) - v_n}{2}, & \text{for } v_n \leq c_\pi(\eta) \\ x_\pi(\eta), & \text{otherwise.} \end{cases}$$

It is easy to check that for  $w_n \in [0, 1]$ ,  $\kappa_n \in \mathcal{L}$ . The above choice of  $z_n$  ensures that  $w_n \in [0, 1]$ . Furthermore,

$$c_\pi(\kappa_n) \leq z_n + \frac{1}{1 - \pi} \mathbb{E}_{\kappa_n} (X - z_n)_+ \leq v_n,$$

where the last inequality follows from the choice of  $w_n$ , whence  $\kappa_n$  are feasible.

Since  $v_n \xrightarrow{n \rightarrow \infty} c_\pi(\eta)$ ,  $\eta_n \xrightarrow{D} \eta$ , and  $\eta_n, \eta \in \mathcal{L}$ ,  $\mathbb{E}_{\eta_n} (X - z_n)_+ \xrightarrow{n \rightarrow \infty} \mathbb{E}_\eta (X - x_\pi(\eta))_+$ , whence,  $w_n \xrightarrow{n \rightarrow \infty} 0$ . With this choice of  $\kappa_n$ ,  $\text{KL}_{\text{inf}}^L(\eta_n, v_n)$  is bounded from above by

$$-\log(1 - w_n) \xrightarrow{n \rightarrow \infty} 0 = \text{KL}_{\text{inf}}^L(\eta, c_\pi(\eta)).$$

□

**Lemma C.5.**  $\text{KL}_{\text{inf}}^U$ , viewed as a function from  $\mathcal{L} \times \left[ -f^{-1}(B), f^{-1}\left(\frac{B}{1-\pi}\right) \right)$ , is a jointly upper-semicontinuous function.

*Proof.* Proof for upper-semicontinuity of  $\text{KL}_{\inf}^U$  follows exactly as proof of the previous lemma. However, we give it for completeness. Define

$$\tilde{D} = \left[ -f^{-1}(B), f^{-1}\left(\frac{B}{1-\pi}\right) \right].$$

Consider the dual formulation of  $\text{KL}_{\inf}^U$  from Theorem 3.4(a). Since for  $v \in \tilde{D}$ ,  $\hat{S}(\eta, v)$  (defined in (11)) is a compact set (see Section D.3), and for all  $y \in \mathfrak{R}$   $g^U(y, \cdot, \cdot)$  is a jointly continuous map,  $\hat{S}(\cdot)$  can be verified to be an upper-hemicontinuous correspondence. Whence, it suffices to show that  $h(v, \eta, \lambda) := \mathbb{E}_{\eta}(\log(g^U(X, \lambda, v)))$  is a jointly upper-semicontinuous map, where  $g^U$  is defined in (9) above.

Consider a sequence  $(v_n, \eta_n, \lambda_n) \in \tilde{D} \times \mathcal{L} \times \hat{S}(v_n)$  converging to  $v, \eta, \lambda \in D \times \mathcal{L} \times \hat{S}(v)$ . Notice that the convergence is defined coordinate-wise, and  $\eta_n$  converges to  $\eta$  in weak topology. It suffices to show:

$$\limsup_{n \rightarrow \infty} h(v_n, \eta_n, \lambda_n) \leq h(v, \eta, \lambda).$$

By Skorokhod's Theorem (see, [9]), there exist random variables  $Y_n, Y$  defined on a common probability space  $(\Omega, \mathcal{F}, q)$  such that  $Y_n \sim \eta_n, Y \sim \eta$  and  $Y_n \xrightarrow{a.s.} Y$ . Hence,  $\log(g^U(Y_n, \lambda_n, v_n)) \xrightarrow{a.s.} \log(g^U(Y, \lambda, v))$ , and

$$h(v_n, \eta_n, \lambda_n) = \mathbb{E}_q(\log(g^U(Y_n, \lambda_n, v_n))) \quad \text{and} \quad h(v, \eta, \lambda) = \mathbb{E}_q(\log(g^U(Y, \lambda, v))).$$

As earlier, let

$$0 \leq Z_n = c_{1n} + c_{2n} |Y_n| + c_{3n} |Y_n|^{1+\epsilon},$$

where

$$c_{1n} = \lambda_{1n} |v_n| + |\lambda_{2n}(1-\pi)| + \lambda_{3n} B, \quad c_{2n} = \frac{\lambda_{1n}}{1-\pi}, \quad c_{3n} = \lambda_{3n},$$

and  $Z_n \xrightarrow{n \rightarrow \infty} Z$  and  $c_{in} \xrightarrow{n \rightarrow \infty} c_i < \infty$ . With these notation,  $\log(g^U(Y_n, \lambda_n, v_n))$  is bounded from above by  $\log(1 + Z_n)$ , and there exist constants  $c_{0n} \xrightarrow{n \rightarrow \infty} c_0$  such that  $\log(1 + Z_n) \leq c_{0n} + (Z_n)^{1/(1+\epsilon)}$ . Using the form of  $Z_n$  from above, there also exist constants  $c_{4n} \xrightarrow{n \rightarrow \infty} c_4$  and  $c_{5n} \xrightarrow{n \rightarrow \infty} c_5$  such that

$$(Z_n)^{1/(1+\epsilon)} \leq c_{4n} + c_{5n} |Y_n|.$$

Thus as earlier, there exist constants  $c_{0n}, c_{4n}, c_{5n}$  converging to  $c_0, c_4, c_5$  such that

$$\log(g^U(Y_n, \lambda_n, v_n)) \leq c_{0n} + c_{4n} + c_{5n} |Y_n| \triangleq f^U(Y_n, \lambda_n, v_n).$$

and

$$f^U(Y_n, \lambda_n, v_n) \xrightarrow{a.s.} f^U(Y, \lambda, v) \quad \text{and} \quad \mathbb{E}_q(f^U(Y_n, \lambda_n, v_n)) \rightarrow \mathbb{E}_q(f^U(Y, \lambda, v)),$$

since  $\eta_n, \eta \in \mathcal{L}$ , whence  $Y_n, Y$  are uniformly integrable (see, [57]). Since,  $f^U(Y_n, \lambda_n, v_n) - \log(g^U(Y_n, \lambda_n, v_n)) \geq 0$ , by Fatou's Lemma,

$$\begin{aligned} \mathbb{E}_q \left( \liminf_{n \rightarrow \infty} (f^U(Y_n, \lambda_n, v_n) - \log(g^U(Y_n, \lambda_n, v_n))) \right) &\leq \mathbb{E}_q(f^U(Y, \lambda, v)) \\ &\quad - \limsup_{n \rightarrow \infty} \mathbb{E}_q(\log(g^U(Y_n, \lambda_n, v_n))), \end{aligned}$$

which implies

$$\begin{aligned} h(v, \eta, \lambda) &= \mathbb{E}_q \left( \limsup_{n \rightarrow \infty} \log(g^U(Y_n, \lambda_n, v_n)) \right) \geq \limsup_{n \rightarrow \infty} \mathbb{E}_q(\log(g^U(Y_n, \lambda_n, v_n))) \\ &= \limsup_{n \rightarrow \infty} h(v_n, \eta_n, \lambda_n). \end{aligned}$$

□

**Remark C.1.**  $\kappa_1 = \pi\delta_0 + (1 - \pi)\delta_{f^{-1}(\frac{B}{1-\pi})}$  and  $\kappa_2 = \delta_{-f^{-1}(B)}$  are unique measures in  $\mathcal{L}$  with CVaR being  $f^{-1}(\frac{B}{1-\pi})$  and  $-f^{-1}(B)$ , respectively. Uniqueness of  $\kappa_2$  follows from the proof of Lemma 2.1. To see the uniqueness of  $\kappa_1$ , consider the following optimization problem, optimal value of which equals  $f^{-1}(\frac{B}{1-\pi})$ :

$$\max_{\eta \in \mathcal{L}} \min_{z \in C} \left\{ z + \frac{1}{1-\pi} \mathbb{E}_\eta (X - z)_+ \right\}.$$

First observe that if  $\mathbb{E}_\eta (f(X)) < B$ , then  $\eta$  does not belong to the set of maximizers above. Using this, it is also sufficient to restrict to 2-point distributions with  $x_\pi(\eta) = 0$  and mass on 0 being  $\pi$ , as otherwise we can improve in the  $B$  constraint, and hence, the objective. Now,  $\kappa_1$  is the unique distribution satisfying the above requirements, with CVaR being  $f^{-1}(\frac{B}{1-\pi})$ .

**Remark C.2.** Consider  $v_n = v = f^{-1}(\frac{B}{1-\pi})$ , and let

$$\eta_n = \left( \pi - \frac{1}{n} \right) \delta_0 + \frac{1}{n} \delta_1 + (1 - \pi) \delta_{f^{-1}(\frac{B}{1-\pi})}, \quad \text{and} \quad \eta = \pi \delta_0 + (1 - \pi) \delta_{f^{-1}(\frac{B}{1-\pi})}.$$

Clearly,  $d_L(\eta_n, \eta) \rightarrow 0$ , as  $n \rightarrow \infty$ . Moreover, Remark C.1 argues that there is a unique  $\kappa \in \mathcal{L}$  such that  $c_\pi(\kappa) = f^{-1}(\frac{B}{1-\pi})$ , whence

$$\text{KL}_{\inf}^U(\eta_n, v_n) = \text{KL}(\eta_n, \kappa) = \infty > 0 = \text{KL}(\eta, \kappa) = \text{KL}_{\inf}(\eta, v).$$

Thus,  $\text{KL}_{\inf}^U(\eta, f^{-1}(B(1 - \pi)^{-1}))$  is not a jointly continuous function. Similar example can be constructed for  $\text{KL}_{\inf}^L(-f^{-1}(B))$ .

### C.3 Proof of Lemma 3.3:

**Upper-hemicontinuity of  $t^*$ :** Let  $\nu$  be in  $\mathcal{A}_j \cap \mathcal{M}$ , i.e., the best-CVaR arm in  $\nu$  is arm  $j$ , and each arm-distribution strictly satisfies the moment-constraint. Then from Lemma 2.1, for all  $i \in [K]$ ,  $c_\pi(\nu_i) \in D^\circ$ . Let  $t^*(\nu)$  be the set of maximizers in

$$V(\nu) = \max_{t \in \Sigma_K} \min_{a \neq j} g_{a,j}(\nu, t),$$

where

$$g_{a,j}(\nu, t) = \inf_{x \leq y} \{ t_j \text{KL}_{\inf}^U(\nu_j, x) + t_a \text{KL}_{\inf}^L(\nu_a, y) \}.$$

The infimum above is attained at a common point between the CVaR of the two distributions, whence the above equals

$$g_{a,j}(\nu, t) = \inf_{x \in [c_\pi(\nu_j), c_\pi(\nu_a)]} \{ t_j \text{KL}_{\inf}^U(\nu_j, x) + t_a \text{KL}_{\inf}^L(\nu_a, x) \}.$$

Using Lemma C.1, it is easy to verify that the set  $[c_\pi(\nu_j), c_\pi(\nu_a)]$  is both upper- and lower-hemicontinuous in  $(\nu, t)$ , whence continuous. Then by Berge's Theorem and joint continuity of  $\text{KL}_{\inf}^L$  and  $\text{KL}_{\inf}^U$  in arguments, when viewed as functions from  $\mathcal{L} \times D^\circ$  (Lemma 3.2),  $g_{a,j}(\nu, t)$  is jointly continuous in  $(\nu, t)$ . Again by Berge's Theorem,  $V(\nu)$ , as a function from  $\mathcal{M}$  to  $\mathbb{R}$ , is a continuous function of  $\nu$ . Furthermore, the set of maximizers,  $\{t^* : V(\nu) = \min_{a \neq j} g_{a,j}(\nu, t^*)\}$ , is an upper-hemicontinuous correspondence.

**Convexity of the set of maximizers:** Let  $t^{(1)}$  and  $t^{(2)}$  belong to  $t^*(\nu)$ . Then,

$$V(\mu) = \min_{a \neq j} g_a(\nu, t^{(1)}) = \min_{a \neq j} g_a(\nu, t^{(2)}).$$

Clearly,  $\min_{a \neq j} g_a(\nu, \lambda t^{(1)} + (1 - \lambda)t^{(2)}) \geq \lambda \min_{a \neq j} g_a(\nu, t^{(1)}) + (1 - \lambda) \min_{a \neq j} g_a(\nu, t^{(2)})$ , which equals  $V(\nu)$ . Since  $t^{(1)}$  and  $t^{(2)}$  are maximizers, the above holds as an equality. Thus the set  $t^*(\nu)$  is convex.

## D Dual formulations

In this section we prove the Theorem 3.4. Recall that  $\mathcal{P}(\mathfrak{R})$  denotes the space of all probability measures on  $\mathfrak{R}$ , and  $M^+$  denotes the collection of all finite, positive measures on  $\mathfrak{R}$ . Let  $\eta \in \mathcal{P}(\mathfrak{R})$ . Then, for  $\pi \in (0, 1)$ ,  $c_\pi(\eta)$  denotes the CVaR of  $\eta$  at the confidence level  $\pi$ . Furthermore,

$$c_\pi(\eta) = \min_{x_0 \in \mathfrak{R}} \left\{ x_0 + \frac{1}{1-\pi} \mathbb{E}_\eta((X - x_0)_+) \right\} \quad (15)$$

$$= \max_{v \in M^+(\mathfrak{R})} \frac{1}{1-\pi} \int_{\mathfrak{R}} y dv(y) \text{ s.t. } \forall y, 0 \leq dv(y) \leq d\eta(y) \text{ and } \int_{\mathfrak{R}} dv(y) = 1 - \pi, \quad (16)$$

For  $\eta \in \mathcal{P}(\mathfrak{R})$ , and  $v \in D^o$ ,

$$\text{KL}_{\inf}^U(\eta, v) = \inf_{\kappa \in \mathcal{L}: c_\pi(\kappa) \geq v} \text{KL}(\eta, \kappa) \quad \text{and} \quad \text{KL}_{\inf}^L(\eta, v) = \inf_{\kappa \in \mathcal{L}: c_\pi(\kappa) \leq v} \text{KL}(\eta, \kappa).$$

Furthermore, extend the Kullback-Leibler Divergence to a function on  $M^+(\mathfrak{R}) \times M^+(\mathfrak{R})$ , i.e.,  $\text{KL} : M^+(\mathfrak{R}) \times M^+(\mathfrak{R}) \rightarrow \mathfrak{R}$  defined as:

$$\text{KL}(\kappa_1, \kappa_2) \triangleq \int_{y \in \mathfrak{R}} \log \left( \frac{d\kappa_1}{d\kappa_2}(y) \right) d\kappa_1(y).$$

Note that for  $\kappa_1 \in \mathcal{P}(\mathfrak{R})$  and  $\kappa_2 \in \mathcal{P}(\mathfrak{R})$ ,  $\text{KL}(\kappa_1, \kappa_2)$  is the usual Kullback-Leibler Divergence between the probability measures.

We first present the proof for the Theorem 3.4(a).

### D.1 $\text{KL}_{\inf}^U$ problem: towards proving Theorem 3.4(a)

Consider the following optimization problem, which is equivalent to the  $\text{KL}_{\inf}^U$  problem (see, (16)).

$$\begin{aligned} \min_{\substack{\kappa \in M^+ \\ W \in M^+}} \text{KL}(\eta, \kappa) \quad \text{subject to} \quad & \frac{1}{1-\pi} \int_{\mathfrak{R}} x dW(x) \geq v \\ & \int_{\mathfrak{R}} dW(x) = 1 - \pi \\ & \int_{\mathfrak{R}} f(x) d\kappa(x) \leq B \\ & \int_{\mathfrak{R}} d\kappa(x) = 1 \\ & \forall x : 0 \leq dW(x) \leq d\kappa(x) \end{aligned} \quad (17)$$

Introducing the dual variables ( $\lambda_1 \geq 0, \lambda_2 \in \mathfrak{R}, \lambda_3 \geq 0, \lambda_4 \in \mathfrak{R}, \forall x \lambda_5(x) \geq 0$ ). Then, the Lagrangian, denoted as  $L(\kappa, W, \boldsymbol{\lambda})$ , equals

$$\begin{aligned} & \int_{\mathfrak{R}} \log \left( \frac{d\eta}{d\kappa}(y) \right) d\eta(y) + \lambda_1 \left( v - \frac{1}{1-\pi} \int_{\mathfrak{R}} x dW(x) \right) + \lambda_2 \left( \int_{\mathfrak{R}} dW(x) - 1 + \pi \right) \\ & - \lambda_3 B + \lambda_3 \int_{\mathfrak{R}} f(x) d\kappa(x) + \lambda_4 \left( \int_{\mathfrak{R}} d\kappa(x) - 1 \right) + \int_{\mathfrak{R}} \lambda_5(x) (dW(x) - d\kappa(x)). \end{aligned}$$

The Lagrangian dual problem is

$$\max_{\substack{\lambda_1 \geq 0, \lambda_2 \in \mathfrak{R}, \lambda_3 \geq 0, \\ \lambda_4 \in \mathfrak{R}, \forall x: \lambda_5(x) \geq 0}} \inf_{\substack{\kappa \in M^+ \\ W \in M^+}} L(\kappa, W, \boldsymbol{\lambda}). \quad (18)$$

Let  $S = (\lambda_1 \geq 0, \lambda_2 \in \mathfrak{R}, \lambda_3 \geq 0, \lambda_4 \in \mathfrak{R}, \forall x: \lambda_5(x) \geq 0)$ , and define

$$S_1 = S \cap \{ \boldsymbol{\lambda} : \forall x \in \mathfrak{R}, \lambda_4 + \lambda_3 f(x) - \lambda_3 B - \lambda_5(x) \geq 0 \}.$$

**Lemma D.1.** *The Lagrangian dual problem (18) satisfies*

$$\max_{\substack{\lambda_1 \geq 0, \lambda_2 \in \mathfrak{R}, \lambda_3 \geq 0, \\ \lambda_4 \in \mathfrak{R}, \forall x: \lambda_5(x) \geq 0}} \inf_{\substack{\kappa \in M^+ \\ W \in M^+}} L(\kappa, W, \boldsymbol{\lambda}) = \max_{\boldsymbol{\lambda} \in S_1} \inf_{\substack{\kappa \in M^+ \\ W \in M^+}} L(\kappa, W, \boldsymbol{\lambda}).$$

*Proof.* Consider  $\lambda \in S$  and  $\lambda \notin S_1$ . Then, there exists  $y_0 \in \mathfrak{R}$  such that

$$\lambda_4 + \lambda_3 f(y_0) - \lambda_3 B - \lambda_5(y_0) < 0.$$

Consider the measure  $\kappa_M \in M_+$  such that  $\kappa_M(y_0) = M$  and

$$\frac{d\eta}{d\kappa_M}(y) = 1, \quad \text{for } y \in \{\text{Supp}(\eta) \setminus y_0\}.$$

Then,  $L(\kappa_M, W, \lambda)$  equals

$$\begin{aligned} & \int_{\mathfrak{R}} \log \left( \frac{d\eta}{d\kappa_M}(y) \right) d\eta(y) + \int_{\mathfrak{R}} (\lambda_4 + \lambda_3 f(y) - \lambda_3 B - \lambda_5(x)) d\kappa_M(x) \\ & + \lambda_1 \left( v - \frac{1}{1-\pi} \int_{\mathfrak{R}} x dW(x) \right) + \lambda_2 \left( \int_{\mathfrak{R}} dW(x) - 1 + \pi \right) - \lambda_4 + \int_{\mathfrak{R}} \lambda_5(x) dW(x). \end{aligned} \quad (19)$$

Clearly, the first two terms in the expression above decrease to  $-\infty$  as  $M$  increases to  $\infty$ . Thus, for  $\lambda \in S$  and  $\lambda \notin S_1$ , the infimum in the inner optimization problem in (18) is  $-\infty$ , and we get the desired equality.  $\square$

Let  $\mathcal{Z}(\lambda) = \{y \in \mathfrak{R} : \lambda_4 + \lambda_3 f(y) - \lambda_5(y) = 0\}$ .

**Lemma D.2.** For  $\lambda \in S_1$ ,  $\kappa^*$  that minimizes  $L(\kappa, W, \lambda)$  satisfies  $\text{Supp}(\kappa^*) \subset \text{Supp}(\eta) \cup \mathcal{Z}(\lambda)$ . Furthermore, for  $y \in \text{Supp}(\eta)$ ,  $\lambda_4 + \lambda_3 f(y) - \lambda_3 B - \lambda_5(y) > 0$ , and

$$\frac{d\kappa^*}{d\eta}(y) = (\lambda_4 + \lambda_3 f(y) - \lambda_3 B - \lambda_5(y))^{-1}. \quad (20)$$

*Proof.* Clearly, for  $\lambda \in S_1$ ,  $L(\kappa, W, \lambda)$  is a strictly convex function of  $\kappa$  being minimized over a convex set  $M^+$ . Thus, if there is a minimizer of  $L(\kappa, W, \lambda)$  over  $M^+$ , it is unique. It is then sufficient to show that  $\kappa^*$  satisfying the conditions of the Lemma minimizes  $L(\kappa, W, \lambda)$ . Let  $\kappa_1 \neq \kappa^*$  and  $\kappa_1 \in M^+$ . For  $t \in [0, 1]$ , define  $\kappa_{2,t} = (1-t)\kappa^* + t\kappa_1$ . Then  $\kappa_{2,t} \in M^+$  and it suffices to show that

$$\left. \frac{\partial L(\kappa_{2,t}, W, \lambda)}{\partial t} \right|_{t=0} \geq 0.$$

To see this, substituting for  $\kappa_{2,t}$  in (19),  $L(\kappa_{2,t}, W, \lambda)$  equals

$$\begin{aligned} & \int_{\text{Supp}(\eta)} \log \left( \frac{d\eta}{d\kappa_{2,t}}(y) \right) d\eta(y) + \int_{\mathfrak{R}} (\lambda_4 + \lambda_3 f(y) - \lambda_5(x)) d\kappa_{2,t}(x) \\ & + \lambda_1 \left( v - \frac{1}{1-\pi} \int_{\mathfrak{R}} x dW(x) \right) - \lambda_3 B + \lambda_2 \left( \int_{\mathfrak{R}} dW(x) - 1 + \pi \right) - \lambda_4 + \int_{\mathfrak{R}} \lambda_5(x) dW(x). \end{aligned}$$

Differentiating with respect to  $t$  and evaluating at  $t = 0$ , the derivative  $\left. \frac{\partial L(\kappa_{2,t}, W, \lambda)}{\partial t} \right|_{t=0}$  equals

$$\int_{\text{Supp}(\eta)} \frac{d\eta}{d\kappa^*}(y) (d\kappa^* - d\kappa_1)(y) + \int_{\mathfrak{R}} (\lambda_4 + \lambda_3 f(y) - \lambda_3 B - \lambda_5(y)) (d\kappa_1 - d\kappa^*)(y).$$

Now, using the form of  $\kappa^*$  from (20), the above expression simplifies to

$$\int_{\mathfrak{R} \setminus \text{Supp}(\eta)} (\lambda_4 + \lambda_3 f(y) - \lambda_3 B - \lambda_5(y)) d\kappa_1(y) - \int_{\mathfrak{R} \setminus \text{Supp}(\eta)} (\lambda_4 + \lambda_3 f(y) - \lambda_3 B - \lambda_5(y)) d\kappa^* \geq 0,$$

where the inequality above follows since the integrand is 0 in the second term, while it is non-negative in the first term.  $\square$

### D.1.1 Proof of Theorem 3.4(a)

We first show that the dual problem in (18) simplifies to the alternative expression for  $\text{KL}_{\inf}^{\text{U}}(\eta, v)$  in the Theorem. Then we argue that both the  $\text{KL}_{\inf}^{\text{U}}$  primal problem in (17) and the dual problems are feasible, and that strong duality holds.

Using the expression for the optimizer for optimal  $\kappa^*$  (Lemma D.2) in the Lagrangian dual in Lemma D.1, (18) equals

$$\begin{aligned} \max_{\lambda \in S_1} \inf_{W \in M^+} \int_{\mathfrak{R}} \log(\lambda_4 + \lambda_3 f(y) - \lambda_3 B - \lambda_5(y)) d\eta(y) \\ + \int_{\mathfrak{R}} dW(x) \left( -\frac{\lambda_1 x}{1-\pi} + \lambda_2 + \lambda_5(x) \right) + 1 + \lambda_1 v - \lambda_2(1-\pi) - \lambda_4. \end{aligned}$$

Since  $W \in M^+$ , and if  $\lambda$  are such that the integrand in the second term above is negative, then the value of the expression above will be  $-\infty$ . Thus, it suffices to restrict  $\lambda$  so that this does not happen. Let

$$S_2 = S_1 \cap \left\{ \lambda : \forall x, -\frac{\lambda_1 x}{1-\pi} + \lambda_2 + \lambda_5(x) \geq 0 \right\}.$$

Then the dual problem simplifies to

$$\max_{\lambda \in S_2} \int_{\mathfrak{R}} \log(\lambda_4 + \lambda_3 f(y) - \lambda_3 B - \lambda_5(y)) d\eta(y) + 1 + \lambda_1 v - \lambda_2(1-\pi) - \lambda_4.$$

Optimizing over the common scaling of the dual variables, we get

$$\max_{\lambda \in S_2} \int_{\mathfrak{R}} \log \left( \frac{\lambda_4 + \lambda_3 f(y) - \lambda_3 B - \lambda_5(y)}{-\lambda_1 v + \lambda_2(1-\pi) + \lambda_4} \right) d\eta(y).$$

Observe that  $-\lambda_1 v + \lambda_2(1-\pi) + \lambda_4 \geq 0$ , for the dual optimal variables. Thus, it is sufficient to restrict the variables to satisfy this constraint. This follows from the complementary slackness condition and the restrictions in the set  $S_2$ . We later show that strong duality holds. Since the problem is a convex optimization problem, the dual optimal variables satisfy the complementary slackness conditions.

Setting  $\tilde{\lambda}_4 = -\lambda_1 v + \lambda_2(1-\pi) + \lambda_4$ , and substituting in the above expression, we get

$$\max_{\lambda \in S_3(v)} \int_{\mathfrak{R}} \log(1 + \lambda_1 v - \lambda_2(1-\pi) + \lambda_3 f(y) - \lambda_3 B - \lambda_5(y)) d\eta(y),$$

where  $S_3(v)$  is  $S_2$  with the above modifications, and is given by intersection of the set  $S$  with the set

$$\left\{ \lambda : \forall y, 1 + \lambda_1 v - \lambda_2(1-\pi) + \lambda_3 f(y) - \lambda_3 B - \lambda_5(y) \geq 0, \text{ \& } \forall x \lambda_5(x) \geq \left( \frac{\lambda_1 x}{1-\pi} - \lambda_2 \right)_+ \right\}.$$

Further, optimizing over  $\lambda_5(x)$ , the dual representation simplifies to

$$\max_{\lambda \in \hat{S}(v)} \mathbb{E}_{\eta} \left( \log \left( 1 + \lambda_1 v - \lambda_2(1-\pi) + \lambda_3 f(X) - \lambda_3 B - \left( \frac{\lambda_1 X}{1-\pi} - \lambda_2 \right)_+ \right) \right).$$

Thus, it suffices to show that both the primal problem in (17) and the dual in (18) are feasible, and strong duality holds.

Consider  $\lambda^1 = (0, 0, 0, 1, 0)$ . To show that dual is feasible, it suffices to show

$$\min_{\kappa \in M^+, W \in M^+} L(\kappa, W, \lambda^1) = \min_{\kappa \in M^+, W \in M^+} \text{KL}(\eta, \kappa) - 1 + \int_{\mathfrak{R}} d\kappa(y) > -\infty.$$

Let  $\tilde{\kappa}$  be the minimizer of the above expression. Then,  $\text{Supp}(\tilde{\kappa}) = \text{Supp}(\eta)$ , as otherwise if there is a point  $y$  in  $\text{Supp}(\eta) \setminus \text{Supp}(\tilde{\kappa})$ , then the above expression is  $\infty$ , and if there is a point in

$\text{Supp}(\tilde{\kappa}) \setminus \text{Supp}(\eta)$ , then the value of the above expression can be improved by removing that mass. Furthermore, from (20),

$$\frac{d\tilde{\kappa}}{d\eta}(y) = 1.$$

We next argue the feasibility of primal problem, and show that strong duality holds. For  $v \leq 0$ , define  $\kappa_1 := \delta_{\epsilon_1}$ , where  $\epsilon_1 > v$  and  $f(\epsilon_1) < B$ . Similarly, for  $v > 0$ , define  $\kappa_2 := q\delta_{f^{-1}(\frac{B}{1-\pi})} + (1-q)\delta_0$ , where  $q < 1 - \pi$  is chosen to satisfy  $c_\pi(\kappa_2) > v$  and  $\mathbb{E}_{\kappa_2}(f(X)) < B$ .

Clearly,  $\kappa_1$  and  $\kappa_2$  defined above, lie in the interior of the feasible region of the primal problem. Hence, strong duality holds if the primal is feasible. To see feasibility, define

$$\tilde{\kappa}_1 := p_1\eta + (1 - p_1)\kappa_1 \quad \text{and} \quad \tilde{\kappa}_2 := p_2\eta + (1 - p_2)\kappa_2,$$

where  $p_1$  and  $p_2$  are chosen to satisfy

$$c_\pi(\tilde{\kappa}_1) > v, \quad \mathbb{E}_{\tilde{\kappa}_1}(f(X)) < B \quad \text{and} \quad c_\pi(\tilde{\kappa}_2) > v, \quad \mathbb{E}_{\tilde{\kappa}_2}(f(X)) < B.$$

It is easy to see the existence of  $p_1, p_2, \epsilon_1$ , and  $q$  satisfying the above requirement.

## D.2 $\text{KL}_{\inf}^L$ problem

For  $\eta \in \mathcal{P}(\mathbb{R})$ , and  $v \in \mathbb{R}$ , using (15), the  $\text{KL}_{\inf}^L$  optimization problem is equivalent to the following optimization problem (we refer to the inner optimization problem in the following as  $\mathcal{O}_1$ ).

$$\begin{aligned} \inf_{-f^{-1}(\frac{B}{\pi}) \leq x_0 \leq v} \min_{\kappa \in M^+(\mathbb{R})} \text{KL}(\eta, \kappa) \quad \text{subject to} \quad & x_0 + \frac{1}{1-\pi} \int_{\mathbb{R}} (y - x_0)_+ d\kappa(y) \leq v \\ & \int_{\mathbb{R}} f(y) d\kappa(y) \leq B \\ & \int_{\mathbb{R}} d\kappa(y) = 1. \end{aligned}$$

We first characterize the solution to the inner optimization problem for a fixed  $x_0$ ,  $\mathcal{O}_1$ . The proof is similar to that for the duality result in [2].

Let  $\gamma = (\gamma_1, \gamma_2, \gamma_3)$ . For  $\kappa \in M^+(\mathbb{R})$ , the Lagrangian, denoted by  $L(\kappa, \gamma, x_0)$ , for the Problem  $\mathcal{O}_1$  is given by,

$$\begin{aligned} \text{KL}(\eta, \kappa) + \gamma_1 \left( x_0 + \frac{1}{1-\pi} \int_{\mathbb{R}} (y - x_0)_+ d\kappa(y) - v \right) \\ + \gamma_2 \left( \int_{\mathbb{R}} f(x) d\kappa(x) - B \right) + \gamma_3 \left( \int_{\mathbb{R}} d\kappa(x) - 1 \right). \end{aligned} \quad (21)$$

Define

$$L(\gamma, x_0) := \inf_{\kappa \in M^+(\mathbb{R})} L(\kappa, \gamma, x_0). \quad (22)$$

The Lagrangian dual problem corresponding to the Problem ( $\mathcal{O}_1$ ) is given by

$$\max_{\gamma_1 \geq 0, \gamma_2 \geq 0, \gamma_3 \in \mathbb{R}} \left( \inf_{\kappa \in M^+(\mathbb{R})} L(\kappa, \gamma, x_0) \right). \quad (23)$$

Let  $\text{Supp}(\kappa)$  denote the support of measure  $\kappa$ ,

$$h(y, \gamma, x_0) \triangleq \frac{\gamma_1}{1-\pi} (y - x_0)_+ + \gamma_3 + \gamma_2 f(y), \quad \mathcal{Z}(\gamma) = \{y \in \mathbb{R} : h(y, \gamma, x_0) = 0\},$$

and

$$\mathcal{R}_3(x_0) = \left\{ \gamma \in \mathbb{R}^3 : \gamma_1 \geq 0, \gamma_2 \geq 0, \gamma_3 \in \mathbb{R}, \inf_{y \in \mathbb{R}} h(y, \gamma, x_0) \geq 0 \right\}.$$

Observe that for  $\gamma \in \mathcal{R}_3(x_0)$ , there is a unique element in  $\mathcal{Z}(\gamma)$ .

**Lemma D.3.** *The Lagrangian dual problem (23) is simplified as below.*

$$\max_{\gamma_3 \in \mathbb{R}, \gamma_1 \geq 0, \gamma_2 \geq 0} \left( \inf_{\kappa \in M^+(\mathbb{R})} L(\kappa, \gamma, x_0) \right) = \max_{\gamma \in \mathcal{R}_3(x_0)} \left( \inf_{\kappa \in M^+(\mathbb{R})} L(\kappa, \gamma, x_0) \right).$$

*Proof.* For  $\gamma \in \mathbb{R}^3 \setminus \mathcal{R}_3(x_0)$ , there exists  $y_0 \in \mathbb{R}$  such that  $h(y_0, \gamma, x_0) < 0$  and it suffices to show that  $L(\gamma, x_0) = -\infty$ , where  $L(\gamma, x_0)$  is defined in (22). Observe that for every  $M > 0$ , there exists a measure  $\kappa_M \in M^+(\mathbb{R})$  satisfying  $\kappa_M(y_0) = M$  and for  $y \in \text{Supp}(\eta) \setminus \{y_0\}$ ,

$$\frac{d\eta}{d\kappa_M}(y) = 1.$$

Then, (21) can be re-written as:

$$L(\kappa_M, \gamma, x_0) = \underbrace{\int_{y \in \mathbb{R}} \log \left( \frac{d\eta}{d\kappa_M}(y) \right) d\eta(y)}_{\triangleq A_1} + \underbrace{\int_{y \in \mathbb{R}} h(y, \gamma, x_0) d\kappa_M(y)}_{\triangleq A_2} + \gamma_1(x_0 - v) - \gamma_3 - \gamma_2 B.$$

From above, it can be easily seen that  $L(\kappa_M, \gamma) \xrightarrow{M \rightarrow \infty} -\infty$ , since  $A_1 + A_2 \rightarrow -\infty$ . Thus, for  $\gamma \in \mathbb{R}^3 \setminus \mathcal{R}_3(x_0)$ ,  $L(\gamma, x_0) = -\infty$  and we get the desired result.  $\square$

**Lemma D.4.** *For  $\gamma \in \mathcal{R}_3(x_0)$ ,  $\kappa^* \in M^+(\mathbb{R})$  that minimizes  $L(\kappa, \gamma, x_0)$ , satisfies*

$$\text{Supp}(\kappa^*) \subset \{\text{Supp}(\eta) \cup \mathcal{Z}(\gamma)\}. \quad (24)$$

Furthermore, for  $y \in \text{Supp}(\eta)$ ,  $h(y, \gamma, x_0) > 0$ , and

$$\frac{d\kappa^*}{d\eta}(y) = \left( \frac{\gamma_1}{1 - \pi}(y - x_0)_+ + \gamma_3 + \gamma_2 f(y) \right)^{-1}. \quad (25)$$

*Proof.* For  $\gamma \in \mathcal{R}_3(x_0)$ ,  $L(\kappa, \gamma, x_0)$  is a strictly convex function of  $\kappa$  being minimized over a convex set. Hence, if the minimizer of  $L(\kappa, \gamma, x_0)$  exists, it is unique. It then suffices to show that  $\kappa^*$  satisfying (24) and (25) minimizes  $L(\kappa, \gamma, x_0)$ .

Let  $\kappa_1$  be any measure in  $M^+(\mathbb{R})$  that is different from  $\kappa^*$ . Since  $M^+(\mathbb{R})$  is a convex set, for  $t \in [0, 1]$ ,  $\kappa_{2,t} \triangleq (1 - t)\kappa^* + t\kappa_1$  belongs to  $M^+(\mathbb{R})$ . Since  $L(\kappa, \gamma, x_0)$  is convex in  $\kappa$ , to show that  $\kappa^*$  minimizes  $L(\kappa, \gamma, x_0)$ , it suffices to show

$$\left. \frac{\partial L(\kappa_{2,t}, \gamma)}{\partial t} \right|_{t=0} \geq 0.$$

Substituting for  $\kappa_{2,t}$  in (21),  $L(\kappa_{2,t}, \gamma)$  equals

$$\int_{y \in \text{Supp}(\eta)} \log \left( \frac{d\eta}{d\kappa_{2,t}}(y) \right) d\eta(y) + (\gamma_1(x_0 - v) - \gamma_3 - \gamma_2 B) + \int_{\mathbb{R}} h(y, \gamma, x_0) d\kappa_{2,t}(y).$$

Evaluating the derivative with respect to  $t$  at  $t = 0$ ,

$$\left. \frac{\partial L(\kappa_{2,t}, \gamma)}{\partial t} \right|_{t=0} = \int_{y \in \text{Supp}(\eta)} \frac{d\eta}{d\kappa^*}(y) (d\kappa^* - d\kappa_1)(y) + \int_{\mathbb{R}} h(y, \gamma, x_0) (d\kappa_1 - d\kappa^*)(y).$$

For  $y \in \text{Supp}(\eta)$ ,  $\partial \eta / \partial \kappa^* = h(y, \gamma, x_0)$ . Substituting this in the above expression, we get:

$$\begin{aligned} \left. \frac{\partial L(\kappa_{2,t}, \gamma)}{\partial t} \right|_{t=0} &= \int_{y \in \text{Supp}(\eta)} h(y, \gamma, x_0) (d\kappa^* - d\kappa_1)(y) - \int_{\mathbb{R}} h(y, \gamma, x_0) (d\kappa^* - d\kappa_1)(y) \\ &= \int_{y \in \{\mathbb{R} \setminus \text{Supp}(\eta)\}} h(y, \gamma, x_0) d\kappa_1(y) - \int_{y \in \{\mathbb{R} \setminus \text{Supp}(\eta)\}} h(y, \gamma, x_0) d\kappa^*(y) \\ &\geq 0, \end{aligned}$$

where, for the last inequality, we have used the fact that for  $y \in \{\text{Supp}(\kappa^*) \setminus \text{Supp}(\eta)\}$ ,  $h(y, \gamma, x_0) = 0$  and  $h(y, \gamma, x_0) \geq 0$ , otherwise.  $\square$

### D.2.1 Proof of Theorem 3.4(b)

To prove the alternative expression for  $\text{KL}_{\inf}^L$  given by this theorem, we first show that both the primal and dual problems ( $\mathcal{O}_1$  and  $\mathcal{O}_2$ , respectively) are feasible and that strong duality holds for the Problem  $\mathcal{O}_1$ . We then show that the alternative formulation for  $\text{KL}_{\inf}^L$  is its simplified dual formulation.

Let  $\delta_y$  denote a unit mass at point  $y$ . For  $x_0 > 0$ , define  $\kappa_1 = (1 - \pi)\delta_{x_0 - \epsilon_0} + \pi\delta_0$ , where  $\epsilon_0$  is chosen to satisfy  $f(x_0 - \epsilon_0)(1 - \pi) < B$ . Similarly, for the other case ( $x_0 \leq 0$ ), for  $x_0 \neq v$  and  $x_0 > -f^{-1}(\frac{B}{\pi})$ , define  $\kappa_2 := \pi\delta_{x_0 - \epsilon_1} + (1 - \pi)\delta_{x_0 + \epsilon_2}$ , where  $\epsilon_1$  and  $\epsilon_2$  are chosen to satisfy

$$x_0 + \epsilon_2 < v \quad \text{and} \quad \pi f|x_0 - \epsilon_1| + (1 - \pi)f(x_0 + \epsilon_2) < B.$$

Also, for  $x_0 = -f^{-1}(\frac{B}{\pi})$ , for  $v > 0$ , define  $\kappa_3 = (1 - \pi)\delta_0 + \pi\delta_{(-f^{-1}(\frac{B}{\pi}) + \epsilon_3)}$ , where  $\epsilon_3$  is chosen to satisfy  $0 < \epsilon_3 < \frac{1 - \pi}{\pi}v$ . Similarly, for  $x_0 = -f^{-1}(\frac{B}{\pi})$  and  $v < 0$ , define  $\kappa_4 = (\pi - \epsilon_4)\delta_{-f^{-1}(\frac{B}{\pi})} + (1 - \pi + \epsilon_4)\delta_{v - \epsilon_5}$ , where  $\epsilon_4 > 0$  and  $\epsilon_5 > 0$  are chosen to satisfy

$$\frac{\epsilon_4}{1 - \pi + \epsilon_4} \left( f^{-1}\left(\frac{B}{\pi}\right) + v \right) < \epsilon_5 < f^{-1}\left(\frac{B}{1 - \pi + \epsilon_4}\right) + v.$$

Define

$$\begin{aligned} \kappa_0 := & \kappa_1 \mathbf{1}(x_0 > 0) + \kappa_2 \mathbf{1}(x_0 \leq 0) \mathbf{1}\left(-f^{-1}\left(\frac{B}{\pi}\right) < x_0 < v\right) + \delta_v \mathbf{1}(x_0 = v) \mathbf{1}(x_0 \leq 0) \\ & + \mathbf{1}\left(x_0 = -f^{-1}\left(\frac{B}{\pi}\right)\right) (\kappa_3 \mathbf{1}(v > 0) + \kappa_4 \mathbf{1}(v \leq 0)). \end{aligned}$$

Clearly,  $\kappa_0$  defined above satisfies all the inequality constraints in the primal problem strictly, whence, lies in the interior of the feasible region.

Recall that  $c_\pi(\eta)$  is a concave function of  $\eta$  (see (15)). It is then easy to check that there exists  $0 < p < 1$  such that  $\kappa' := p\eta + (1 - p)\kappa_0$  is feasible for the primal problem, and  $\text{KL}(\eta, \kappa') < \infty$ . Hence, primal problem  $\mathcal{O}_1$  is feasible.

Next, we claim that  $\gamma^1 = (0, 0, 1)$  is a dual feasible solution. To this end, it is sufficient to show that

$$\min_{\kappa \in M^+(\mathfrak{R})} L(\kappa, (0, 0, 1), x_0) > -\infty.$$

Observe that for  $\kappa \in M^+(\mathfrak{R})$ ,  $\text{KL}(\eta, \kappa)$  defined to extend the usual definition of Kullback-Leibler Divergence to include all measures in  $M^+(\mathfrak{R})$ , can be negative with arbitrarily large magnitude. From (21),

$$L(\kappa, \gamma^1, x_0) = \text{KL}(\eta, \kappa) - 1 + \int_{\mathfrak{R}} d\kappa(y).$$

Let  $\tilde{\kappa}$  denote the minimizer of  $L(\kappa, \gamma^1, x_0)$ . Then, as earlier,  $\text{Supp}(\tilde{\kappa}) = \text{Supp}(\eta)$ . Furthermore, from Lemma D.4, for  $y$  in  $\text{Supp}(\eta)$ , the optimal measure  $\tilde{\kappa}$  must satisfy

$$\frac{d\tilde{\kappa}}{d\eta}(y) = 1.$$

Thus,  $\tilde{\kappa} = \eta$  and  $\min_{\kappa \in M^+(\mathfrak{R})} L(\kappa, \gamma^1, x_0) = 0$ . This proves the feasibility of the dual problem  $\mathcal{O}_2$ .

Since both primal and dual problems are feasible, both have optimal solutions. Furthermore,  $\kappa_0$  defined earlier satisfies all the inequality constraints of ( $\mathcal{O}_1$ ) strictly, hence lies in the interior of the feasible region (Slater's conditions are satisfied). Thus strong duality holds for the problem ( $\mathcal{O}_1$ ) and there exists optimal dual variable  $\gamma^* = (\gamma_1^*, \gamma_2^*, \gamma_3^*)$  that attains maximum in the problem  $\mathcal{O}_2$  (see, [41, Theorem 1, Page 224]).

Also, since the primal problem (for fixed  $x_0$ ) is minimization of a strictly-convex function (which is non-negative on the feasible set) with an optimal solution over a closed and convex set, it attains its infimum within the set. Strong duality implies

$$\text{KL}_{\inf}(\eta, v) = \min_{-f^{-1}(\frac{B}{\pi}) \leq x_0 \leq v} \max_{\gamma \in \mathcal{R}_3(x_0)} \inf_{\kappa \in M^+(\mathfrak{R})} L(\kappa, \boldsymbol{\lambda}, x_0).$$

Let  $\kappa^*$  and  $\gamma^*$  denote the optimal primal and dual variables. Since strong duality holds, and the problem  $(\mathcal{O}_1)$  is a convex optimization problem, KKT conditions are necessary and sufficient for  $\kappa^*$  and  $\gamma^*$  to be optimal variables (see, [11, page 224]). Hence  $\kappa^*, \gamma_3^* \in \mathfrak{R}$ ,  $\gamma_1^* \geq 0$ , and  $\gamma_2^* \geq 0$  must satisfy the following conditions (KKT):

$$\begin{aligned} \kappa^* \in M^+(\mathfrak{R}), \quad \int_{\mathfrak{R}} d\kappa^*(y) = 1, \quad x_0 + \frac{1}{1-\pi} \int_{x_0}^{\infty} (y - x_0) d\kappa^*(y) \leq v, \quad \int_{\mathfrak{R}} f(y) d\kappa^*(y) \leq B, \\ \int_{x_0}^{\infty} \gamma_1^* \frac{y - x_0}{1-\pi} d\kappa^*(y) = \gamma_1^*(v - x_0), \quad \int_{\mathfrak{R}} \gamma_3^* d\kappa^*(y) = \gamma_3^*, \quad \int_{\mathfrak{R}} \gamma_2^* f(y) d\kappa^*(y) = \gamma_2^* B. \end{aligned} \quad (26)$$

and  $(\gamma_1^*, \gamma_2^*, \gamma_3^*) \in \mathcal{R}_3(x_0)$ . Furthermore,  $\kappa^*$  minimizes  $L(\kappa, \gamma^*, x_0)$ . From conditions (26), and Lemma D.4,  $L(\kappa^*, \gamma^*) = \mathbb{E}_{\eta}(h(X, \gamma^*, x_0))$ , where  $X$  is the random variable distributed as  $\eta$ . Adding the equations in (26), and using the form of  $\kappa^*$  from Lemma D.4, we get  $\gamma_3^* = 1 - \gamma_1^*(v - x_0) - \gamma_2^* B$ .

For  $\tilde{\gamma} = (\tilde{\gamma}_1, \tilde{\gamma}_2)$  let,

$$g^L(X, \tilde{\gamma}, v, x_0) := 1 - \tilde{\gamma}_1 \left( v - x_0 - \frac{(X - x_0)_+}{1-\pi} \right) - \tilde{\gamma}_2 (B - f(X)).$$

and

$$\mathcal{R}_2(x_0, v) := \{ \gamma_1 \geq 0, \gamma_2 \geq 0 : \forall y \in \mathfrak{R}, g^L(y, (\gamma_1, \gamma_2), x_0, v) \geq 0 \}.$$

With this condition on  $\gamma_3^*$ , the region  $\mathcal{R}_3(x_0, v)$  reduces to the region  $\mathcal{R}_2(x_0)$ . Since we know that the optimal  $\gamma^*$  in  $\mathcal{R}_3(x_0)$  with the corresponding minimizer,  $\kappa^*$ , satisfies the conditions in (26) and that  $\gamma_3^*$  has the specific form given above, the dual optimal value remains unaffected by adding these conditions as constraints in the dual optimization problem. With these conditions, the dual reduces to

$$\max_{(\gamma_1, \gamma_2) \in \mathcal{R}_2(x_0, v)} \mathbb{E}_{\eta}(\log(g^L(X, \gamma, x_0, v))),$$

and by strong duality, this is also the value of  $\text{KL}_{\inf}(\eta, x)$ .

### D.3 Compactness of the dual regions

In this section we show that for valid values of  $v$  and  $x_0$ , the regions  $\hat{S}(v)$  and  $\mathcal{R}_2(x_0, v)$  are closed and bounded, i.e., compact. Recall that for  $v \in D^o = \left( -f^{-1}(B), f^{-1}\left(\frac{B}{1-\pi}\right) \right)$ ,  $x_0 \in C = \left[ -f^{-1}\left(\frac{B}{\pi}\right), f^{-1}\left(\frac{B}{1-\pi}\right) \right]$ ,  $\lambda \in \mathfrak{R}^3$  and  $\gamma \in \mathfrak{R}^2$ ,

$$\begin{aligned} g^U(X, \lambda, v) &= 1 + \lambda_1 v - \lambda_2(1 - \pi) + \lambda_3(f(X) - B) - \left( \frac{\lambda_1 X}{1-\pi} - \lambda_2 \right)_+, \\ g^L(X, \gamma, v, x_0) &= 1 - \gamma_1 \left( v - x_0 - \frac{(X - x_0)_+}{1-\pi} \right) - \gamma_2(B - f(X)), \\ \hat{S}(v) &= \{ \lambda_1 \geq 0, \lambda_2 \in \mathfrak{R}, \lambda_3 \geq 0 : \forall x \in \mathfrak{R}, g^U(x, \lambda, v) \geq 0 \}, \end{aligned}$$

and

$$\mathcal{R}_2(x_0, v) = \{ \gamma_1 \geq 0, \gamma_2 \geq 0 : \forall y \in \mathfrak{R}, g^L(y, (\gamma_1, \gamma_2), x_0, v) \geq 0 \}, \quad (27)$$

where  $f(y) = |y|^{1+\epsilon}$  for some  $\epsilon > 0$ .

We first state a few results, which are easy to prove, and will be used later.

**Lemma D.5.** For  $a > 0, b > 0$ , and  $z \in \mathfrak{R}$ , the minimizer,  $x^*$ , for  $a|x|^{1+\epsilon} + b(x-z)_+$  satisfies

$$x^* = \begin{cases} 0, & \text{if } z \geq 0 \\ z, & \text{if } z < 0, \text{ and } z \geq -\left(\frac{b}{a(1+\epsilon)}\right)^{\frac{1}{\epsilon}} \\ -\left(\frac{b}{a(1+\epsilon)}\right)^{\frac{1}{\epsilon}}, & \text{otherwise.} \end{cases}$$

**Lemma D.6.** For  $\epsilon > 0$ ,  $b \geq 0$ ,  $a \in \mathbb{R}$ , and  $c \geq 0$ , the set of  $p \geq 0$ ,  $q \geq 0$ , satisfying

$$a - bp + cq - \frac{\epsilon}{p^{\frac{1}{\epsilon}}} \left( \frac{q}{1 + \epsilon} \right)^{1 + \frac{1}{\epsilon}} \geq 0$$

is compact, provided  $c^{1+\epsilon} \leq b$ . Moreover,

$$p \in \left[ 0, \frac{a}{c^{1+\epsilon} - b} \right]; \quad q \in \left[ 0, \frac{a}{c - b^{\frac{1}{1+\epsilon}}} \right].$$

**Lemma D.7.** For  $v \in \left[ -f^{-1}(B), f^{-1}\left(\frac{B}{1-\pi}\right) \right)$ ,  $\hat{S}(v)$  is compact.

*Proof.* For  $\lambda \in \hat{S}(v)$ ,

$$\min_y 1 + \lambda_1 v - \lambda_2(1 - \pi) + \lambda_3(f(y) - B) - \left( \frac{\lambda_1 y}{1 - \pi} - \lambda_2 \right) \geq 0,$$

and

$$\min_y 1 + \lambda_1 v - \lambda_2(1 - \pi) + \lambda_3(f(y) - B) \geq 0.$$

The l.h.s. in the first inequality above is a convex function which is minimized at  $y_1$  for which the derivative of the l.h.s. is 0, while the l.h.s. of the second inequality above is minimized at  $y_2 = 0$ . Substituting for  $y_1$  and  $y_2$  in the above inequalities,

$$\frac{1 + \lambda_1 v - \lambda_3 B}{1 - \pi} \geq \lambda_2 \geq \frac{\lambda_1^{1+1/\epsilon}}{\lambda_3^{1/\epsilon}} \frac{\epsilon}{(1 + \epsilon)^{1+1/\epsilon}} \frac{1}{(1 - \pi)^{1+1/\epsilon}} \frac{1}{\pi} - \frac{1 + \lambda_1 v - \lambda_3 B}{\pi}. \quad (28)$$

Eliminating  $\lambda_2$  and simplifying,

$$\frac{\lambda_1^{1+1/\epsilon} \epsilon}{(1 + \epsilon)^{1+1/\epsilon}} \frac{1}{(1 - \pi)^{1/\epsilon}} - \lambda_3^{\frac{1}{\epsilon}} - \lambda_1 \lambda_3^{\frac{1}{\epsilon}} v + \lambda_3^{1+1/\epsilon} B \leq 0. \quad (29)$$

L.h.s. above is a convex function of  $\lambda_1$  which is minimized at

$$\lambda_1^* = \lambda_3 v^\epsilon (1 - \pi)(1 + \epsilon).$$

In particular, (29) holds for  $\lambda_1^*$ . On substituting  $\lambda_1^*$  in (29), we get

$$\lambda_3 \leq (B - v^{1+\epsilon}(1 - \pi))^{-1}.$$

Again, observe that l.h.s. in (29) is a convex function of  $\lambda_3$  which is minimized at

$$\lambda_3^* = \frac{1 + \lambda_1 v}{B(1 + \epsilon)}.$$

Substituting  $\lambda_3^*$  in (29), we get

$$\lambda_1 \leq \left( \left( \frac{B}{\epsilon^\epsilon (1 - \pi)} \right)^{1 + \frac{1}{\epsilon}} - v \right)^{-1}.$$

These bounds on  $\lambda_1$  and  $\lambda_3$ , together with the fact that  $\lambda_1 \geq 0$  and  $\lambda_3 \geq 0$ , and bounding  $\lambda_2$  using (28), we get that the region specified by  $\hat{S}(v)$  is compact.  $\square$

**Lemma D.8.** For  $v \in \left[ -f^{-1}(B), f^{-1}\left(\frac{B}{1-\pi}\right) \right]$  and  $x_0 \in \left[ -f^{-1}\left(\frac{B}{\pi}\right), v \right)$ ,  $\mathcal{R}_2(x_0, v)$  is compact.

*Proof.* For  $\gamma \in \mathcal{R}_2(v, x_0)$ ,

$$\min_y 1 - \gamma_1(v - x_0) + \gamma_1 \frac{(y - x_0)_+}{1 - \pi} - \gamma_2(B - |y|^{1+\epsilon}) \geq 0. \quad (30)$$

Using Lemma D.5, the region-constraint above can be re-written as

$$0 \leq 1 - \gamma_1(v - x_0) - \gamma_2 B + \begin{cases} 0, & \text{if } x_0 \geq 0, \\ \gamma_2 |x_0|^{1+\epsilon}, & \text{if } 0 \geq x_0 \geq -\left(\frac{\gamma_1}{\gamma_2(1-\pi)(1+\epsilon)}\right)^{\frac{1}{\epsilon}}, \\ -\gamma_1 \frac{x_0}{1-\pi} - \frac{\epsilon}{\gamma_2^{\frac{1}{\epsilon}}} \left(\frac{\gamma_1}{(1-\pi)(1+\epsilon)}\right)^{1+\frac{1}{\epsilon}}, & \text{if } -\left(\frac{\gamma_1}{\gamma_2(1-\pi)(1+\epsilon)}\right)^{\frac{1}{\epsilon}} \geq x_0. \end{cases}$$

Let  $x_0 \neq v$ . In this case, for  $x_0 \geq 0$ ,

$$\gamma_1 \leq (v - x_0)^{-1} \quad \text{and} \quad \gamma_2 \leq B^{-1}.$$

For  $x_0 \neq v$ , in the bottom case, optimizing out  $\gamma_1$  and setting derivative to 0, together with the fact that  $\gamma_1 \geq 0$ , we get that the minimizer

$$\gamma_1^* = \max \{0, \gamma_2(1+\epsilon)(1-\pi)(-\pi x_0 - (1-\pi)v)^{\epsilon}\}.$$

This gives

$$\gamma_2 \leq \left(B - \max \{0, -\pi x_0 - (1-\pi)v\}^{1+\epsilon}\right)^{-1}.$$

Furthermore, the case constraint gives that

$$\gamma_1 \leq (-x_0)^{\epsilon} \gamma_2 (1-\pi)(1+\epsilon) \leq \frac{(-x_0)^{\epsilon}(1-\pi)(1+\epsilon)}{B - \max \{0, -\pi x_0 - (1-\pi)v\}^{1+\epsilon}}.$$

Note that for  $v > -f^{-1}(B)$ , the denominators in the bounds above is strictly positive.

Let us now consider the center case with  $x_0 \neq v$ . In this case, the region constraint is

$$0 \leq 1 - \gamma_1(v - x_0) - \gamma_2 \left(B - |x_0|^{1+\epsilon}\right).$$

Consider optimizing over  $\gamma_1$  to get a bound on  $\gamma_2$ . Since the coefficient of  $\gamma_1$  is positive, optimal value of  $\gamma_1$  equals 0, in which case,  $\gamma_2$  is at most  $(B - |x_0|^{1+\epsilon})^{-1}$  if  $|x_0|^{1+\epsilon} \leq B$ , otherwise the maximum occurs either at the case-line, or in the bottom case.

Similarly for  $\gamma_1$ , for  $|x_0|^{1+\epsilon} \leq B$ ,  $\gamma_1 \leq (v - x_0)^{-1}$ , and the maximum occurs either at the boundary, or in the bottom case, otherwise.

Thus, overall bounds for  $x_0 \neq v$  are :

$$\begin{aligned} \gamma_1 &\leq (v - x_0)^{-1}, \quad \gamma_2 \leq B^{-1}, \quad \text{for } x_0 \geq 0, \\ \gamma_1 &\leq (v - x_0)^{-1}, \quad \gamma_2 \leq (B - |x_0|^{1+\epsilon})^{-1}, \quad \text{for } x_0 \leq 0, \quad (-x_0)^{1+\epsilon} \leq B, \\ \text{and for } x_0 \leq 0, \quad (-x_0)^{1+\epsilon} &> B, \end{aligned}$$

$$\gamma_1 \leq \frac{(-x_0)^{\epsilon}(1-\pi)(1+\epsilon)}{B - \max \{0, -\pi x_0 - (1-\pi)v\}^{1+\epsilon}}, \quad \gamma_2 \leq \left(B - \max \{0, -\pi x_0 - (1-\pi)v\}^{1+\epsilon}\right)^{-1}.$$

It is important to note that for  $v > -f^{-1}(B)$ , the bounds above blow-up only for  $x_0 = v$ . This case will be handled separately. Let us now look at the case when  $x_0 = v$ . In this case, (30) simplifies to

$$\min_y 1 + \gamma_1 \frac{(y - x_0)_+}{1-\pi} - \gamma_2 B + \gamma_2 |y|^{1+\epsilon} \geq 0.$$

When  $x_0 \geq 0$ ,  $y = 0$  is the minimizer for l.h.s. above. Substituting this, we get

$$\gamma_2 \leq B^{-1}.$$

**Remark D.1.** When  $x_0 = v \geq 0$ ,  $\gamma_1$  is unbounded. However, if the given probability measure,  $\eta$ , is such that  $\eta(v, \infty) = 0$ , then  $\gamma_1$  doesn't appear in the objective function. Thus, it is sufficient to restrict  $\mathcal{R}_2(x_0(=v), v)$  to the  $\gamma_2$  axis. Hence, the modified region is again compact in this special case.

For the other case, i.e., when  $x_0 = v < 0$ , l.h.s. is minimized at  $y^* \in [x_0, 0]$ , which is given by

$$y^* = (-1) (\gamma_1 \gamma_2^{-1})^{1/\epsilon} \left( (1 - \pi)^{1/\epsilon} (1 + \epsilon)^{1/\epsilon} \right)^{-1}.$$

Substituting and simplifying as above, (or substituting  $y = x_0$ ), we get that

$$\gamma_2 \leq \left( B - |x_0|^{1+\epsilon} \right)^{-1}.$$

Observe that the denominator is positive for  $x_0 = v$ . Since  $y^* \geq x_0$ , we get that

$$\gamma_1 \leq (-x_0)^\epsilon \gamma_2 (1 - \pi) (1 + \epsilon) \leq \frac{(-x_0)^\epsilon (1 - \pi) (1 + \epsilon)}{B - |x_0|^{1+\epsilon}}.$$

Hence, the region  $\mathcal{R}_2(x_0, v)$  is compact in this case too.  $\square$

#### D.4 Discussion on possibility of uniform priors on the dual feasible regions

Consider an arm distribution  $\mu_i$  for  $i \in \{1, \dots, K\}$ . Since  $\hat{S}(c_\pi(\mu_i))$  is compact (see Lemma D.7), uniform measure on the set is well defined. For the region  $\mathcal{R}_2(x_\pi(\mu_i), c_\pi(\mu_i))$ , whenever  $x_\pi(\mu_i) \neq c_\pi(\mu_i)$ , the region  $\mathcal{R}_2(x_\pi(\mu_i), c_\pi(\mu_i))$  is compact, and uniform prior on this set is well defined. When  $\mu_i$  is such that  $x_\pi(\mu_i) = c_\pi(\mu_i)$  (say), then  $\text{Supp}(\mu_i) \subset (-\infty, v]$ . In this case  $\mathcal{R}_2(v, v)$  is unbounded along the  $\gamma_1$  axis. However, from the Remark D.1, it is sufficient to restrict the region along  $\gamma_2$  axis, and this restricted region is then compact. We put uniform prior on this modified region.

#### D.5 The joint-dual problem

Recall that  $\mathcal{L}$  is the class of all probability measures on  $\mathfrak{R}$ , say  $\eta$ , with moment bound, i.e.  $\mathbb{E}_\eta(f(X)) \leq B$ , where  $f(x) = |x|^{1+\epsilon}$  for some  $\epsilon > 0$ .

In this sub-section, we look at the joint optimization problem, which appears in the lower bound as a weighted sum of  $\text{KL}_{\text{inf}}^L$  and  $\text{KL}_{\text{inf}}^U$  for two arms. Specifically, for  $\eta_1, \eta_2 \in \mathcal{P}(\mathfrak{R})$ , and non-negative weights  $\alpha_1, \alpha_2$ , we denote the inner optimization problem in (5) by

$$Z = \inf_{x \leq y} \left\{ \alpha_1 \text{KL}_{\text{inf}}^U(\eta_1, y) + \alpha_2 \text{KL}_{\text{inf}}^L(\eta_2, x) \right\},$$

which is equivalent to the following problem:

$$\begin{aligned} &\text{minimise} && \alpha_1 \text{KL}(\eta_1, \kappa_1) + \alpha_2 \text{KL}(\eta_2, \kappa_2) \\ &\text{subject to} && \kappa_1, \kappa_2 \in \mathcal{L} \\ &&& c_\pi(\kappa_2) \leq c_\pi(\kappa_1) \end{aligned}$$

Using the maximization form of CVaR for  $\kappa_1$  and the minimization form for  $\kappa_2$  from (16) and (15), the above problem is equivalent to

$$\begin{aligned} &\text{minimise} && \alpha_1 \text{KL}(\eta_1, \kappa_1) + \alpha_2 \text{KL}(\eta_2, \kappa_2) \\ &\text{subject to} && \kappa_1, \kappa_2 \in \mathcal{L}, z \in \mathbb{R}, W \in M_+(\mathfrak{R}) \\ &&& z + \frac{1}{1 - \pi} \mathbb{E}_{\kappa_2}((X - z)_+) \leq \frac{1}{1 - \pi} \int_{x \in \mathfrak{R}} x dW(x) \\ &&& \forall x : 0 \leq dW(x) \leq d\kappa_1(x) \\ &&& \int_{x \in \mathfrak{R}} dW(x) = 1 - \pi. \end{aligned}$$

Introducing the dual variables ( $\rho_1 \geq 0, \rho_2 \in \mathfrak{R}, \lambda_1 \in \mathfrak{R}, \lambda_2 \geq 0, \gamma_1 \in \mathfrak{R}, \gamma_2 \geq 0, \forall x \lambda_3(x) \geq 0$ ). Then, single out the minimisation over  $z$ , the Lagrangian in terms of  $\kappa_1, \kappa_2, W$ , denoted as

$L(\kappa_1, \kappa_2, W, \boldsymbol{\lambda}, \boldsymbol{\gamma}, \boldsymbol{\rho})$ , equals

$$\begin{aligned} & \alpha_1 \int_{\mathfrak{R}} \log \left( \frac{d\eta_1}{d\kappa_1}(y) \right) d\eta_1(y) + \alpha_2 \int_{\mathfrak{R}} \log \left( \frac{d\eta_2}{d\kappa_2}(y) \right) d\eta_2(y) + \lambda_1 \left( \int_{\mathfrak{R}} d\kappa_1(x) - 1 \right) \\ & + \lambda_2 \left( \int_{\mathfrak{R}} f(x) d\kappa_1(x) - B \right) + \gamma_1 \left( \int_{\mathfrak{R}} d\kappa_2(x) - 1 \right) + \gamma_2 \left( \int_{\mathfrak{R}} f(x) d\kappa_2(x) - B \right) \\ & + \rho_1 \left( z + \frac{1}{1-\pi} \int (x-z)_+ d\kappa_2(x) - \frac{1}{1-\pi} \int_{\mathfrak{R}} x dW(x) \right) \\ & + \int \lambda_3(x) (dW(x) - d\kappa_1(x)) + \rho_2 \left( \int_{\mathfrak{R}} dW(x) - (1-\pi) \right). \end{aligned}$$

Then the Lagrangian dual problem is

$$\min_{z \in \mathbb{R}} \max_{\substack{\rho_1 \geq 0, \rho_2 \in \mathfrak{R}, \\ \lambda_1 \in \mathfrak{R}, \lambda_2 \geq 0, \lambda_3(x) \geq 0, \\ \gamma_1 \in \mathfrak{R}, \gamma_2 \geq 0.}} \min_{\substack{\kappa_1 \in M^+, \\ \kappa_2 \in M^+, \\ W \in M^+}} L(\kappa_1, \kappa_2, W, \boldsymbol{\lambda}, \boldsymbol{\gamma}, \boldsymbol{\rho}). \quad (31)$$

Let  $S = \{\rho_1 \geq 0, \rho_2 \in \mathfrak{R}, \lambda_1 \in \mathfrak{R}, \lambda_2 \geq 0, \gamma_1 \in \mathfrak{R}, \gamma_2 \geq 0, \forall x \lambda_3(x) \geq 0\}$ , and let  $S_1$  be the set obtained by intersection of  $S$  and set of  $(\boldsymbol{\lambda}, \boldsymbol{\gamma}, \boldsymbol{\rho})$  such that

$$\min_{x \in \mathfrak{R}} \lambda_1 + \lambda_2 f(x) - \lambda_2 B - \lambda_3(x) \geq 0, \quad \min_{x \in \mathfrak{R}} \gamma_1 + \gamma_2 f(x) - \gamma_2 B + \rho_1 \frac{(x-z)_+}{1-\pi} \geq 0.$$

**Lemma D.9.** *The Lagrangian dual problem (31) satisfies*

$$\min_{z \in \mathbb{R}} \max_{\substack{\rho_1 \geq 0, \rho_2 \in \mathfrak{R}, \\ \lambda_1 \in \mathfrak{R}, \lambda_2 \geq 0, \\ \lambda_3(x) \geq 0, \\ \gamma_1 \in \mathfrak{R}, \gamma_2 \geq 0.}} \min_{\substack{\kappa_1 \in M^+, \\ \kappa_2 \in M^+, \\ W \in M^+}} L(\kappa_1, \kappa_2, W, \boldsymbol{\lambda}, \boldsymbol{\gamma}, \boldsymbol{\rho}) = \min_{z \in \mathfrak{R}} \max_{(\boldsymbol{\lambda}, \boldsymbol{\gamma}, \boldsymbol{\rho}) \in S_1} \inf_{\substack{\kappa_1 \in M^+, \\ \kappa_2 \in M^+, \\ W \in M^+}} L(\kappa_1, \kappa_2, W, \boldsymbol{\lambda}, \boldsymbol{\gamma}, \boldsymbol{\rho}).$$

*Proof.* Consider  $(\boldsymbol{\lambda}, \boldsymbol{\gamma}, \boldsymbol{\rho}) \in S$  and  $\boldsymbol{\lambda} \notin S_1$ . Then, there exist  $y_1 \in \mathfrak{R}$  such that

$$\lambda_1 + \lambda_2 f(y_1) - \lambda_2 B - \lambda_3(y_1) < 0.$$

Set  $\kappa_2 = \eta_2$  and define  $\kappa_{1M} \in M_+$  such that  $\kappa_{1M}(y_1) = M$  and

$$\frac{d\eta_1}{d\kappa_{1M}}(y) = 1, \quad \text{for } y \in \{\text{Supp}(\eta_1) \setminus y_1\}.$$

Then,  $L(\kappa_{1M}, \kappa_2, W, \boldsymbol{\lambda}, \boldsymbol{\gamma}, \boldsymbol{\rho})$  equals

$$\begin{aligned} & \alpha_1 \int_{\mathfrak{R}} \log \left( \frac{d\eta_1}{d\kappa_{1M}}(y) \right) d\eta_1(y) + \int_{\mathfrak{R}} (\lambda_1 + \lambda_2 f(x) - \lambda_2 B - \lambda_3(x)) d\kappa_{1M}(x) \\ & + \int_{\mathfrak{R}} \left( \gamma_1 + \gamma_2 f(x) - \gamma_2 B + \frac{\rho}{1-\pi} (x-z)_+ \right) d\kappa_2(x) \\ & + \int_{\mathfrak{R}} \left( -\frac{\rho_1 x}{1-\pi} + \lambda_3(x) + \rho_2 \right) dW(x) - \lambda_1 - \gamma_1 + \rho_1 z - \rho_2 (1-\pi). \end{aligned}$$

Clearly, the first two terms in the expression above decrease to  $-\infty$  as  $M$  increases to  $\infty$ . The other cases, specifically  $(\boldsymbol{\gamma}, \boldsymbol{\rho}) \notin S_1$  and  $(\boldsymbol{\lambda}, \boldsymbol{\gamma}, \boldsymbol{\rho}) \notin S_1$  can be handled similarly. Thus, the infimum in the inner optimization problem in (31) is  $-\infty$ , and we get the desired equality.  $\square$

Using arguments similar to those in Lemma D.2 and Lemma D.4, it can be shown that the optimal  $\kappa_1^*$  and  $\kappa_2^*$ , that solve the inner minimization problem in (31) have the following form:

$$\frac{d\kappa_1^*}{d\eta_1}(y) = \frac{\alpha_1}{\lambda_1 + \lambda_2 (f(y) - B) - \lambda_3(y)} \quad \text{for } y \in \text{Supp}(\eta_1), \quad (32)$$

$$\frac{d\kappa_2^*}{d\eta_2}(y) = \frac{\alpha_2}{\gamma_1 + \gamma_2 (f(y) - B) + \rho_1 \frac{(y-z)_+}{1-\pi}} \quad \text{for } y \in \text{Supp}(\eta_2). \quad (33)$$

Furthermore, for  $y \in \text{Supp}(\kappa_1^*) \setminus \text{Supp}(\eta_1)$ ,  $\lambda_1 + \lambda_2 (f(y) - B) - \lambda_3(y) = 0$  and for  $y \in \text{Supp}(\kappa_2^*) \setminus \text{Supp}(\eta_2)$ ,  $\gamma_1 + \gamma_2 (f(y) - B) + \rho_1 \frac{(y-z)_+}{1-\pi} = 0$ .

### D.5.1 Proof of Proposition 3.5

We first show that the dual problem in (31) simplifies to the alternative expression given in the Theorem. Then we argue that both the primal and the dual problems are feasible, and that strong duality holds.

Using the expressions for the optimizers  $\kappa_1^*$  and  $\kappa_2^*$  from above in the dual in Lemma D.9, the dual in (31) equals

$$\begin{aligned} \min_{z \in \mathcal{R}} \max_{(\boldsymbol{\lambda}, \boldsymbol{\gamma}, \boldsymbol{\rho}) \in S_1} \inf_{W \in M^+} & \alpha_1 \mathbb{E}_{\eta_1} (\log (\lambda_1 + \lambda_2 (f(Y) - B) - \lambda_3(Y))) - \alpha_1 \log \alpha_1 - \alpha_2 \log \alpha_2 - \lambda_1 \\ & + \alpha_2 \mathbb{E}_{\eta_2} \left( \log \left( \gamma_1 + \gamma_2 (f(Y) - B) + \rho_1 \frac{(Y - z)_+}{1 - \pi} \right) \right) + \alpha_1 + \alpha_2 \\ & + \int_{\mathcal{R}} dW(x) \left( -\frac{\rho_1 x}{1 - \pi} + \rho_2 + \lambda_3(x) \right) - \rho_2(1 - \pi) + \rho_1 z - \gamma_1. \end{aligned}$$

Since  $W \in M^+$ , and if  $(\boldsymbol{\lambda}, \boldsymbol{\gamma}, \boldsymbol{\rho})$  are such that the integrand in the integral above is negative, then the value of the expression above will be  $-\infty$ . Thus, it suffices to restrict  $(\boldsymbol{\lambda}, \boldsymbol{\gamma}, \boldsymbol{\rho})$  so that this does not happen. Let

$$S_2 = S_1 \cap \left\{ (\boldsymbol{\lambda}, \boldsymbol{\gamma}, \boldsymbol{\rho}) : \forall x, \lambda_3(x) \geq \left( \frac{\rho_1 x - \rho_2(1 - \pi)}{1 - \pi} \right)_+ \right\}.$$

Then the dual problem simplifies to

$$\begin{aligned} \min_{z \in \mathcal{R}} \max_{(\boldsymbol{\lambda}, \boldsymbol{\gamma}, \boldsymbol{\rho}) \in S_2} & \alpha_1 \mathbb{E}_{\eta_1} (\log (\lambda_1 + \lambda_2 (f(Y) - B) - \lambda_3(Y))) - \alpha_1 \log \alpha_1 - \alpha_2 \log \alpha_2 - \gamma_1 \\ & + \alpha_2 \mathbb{E}_{\eta_2} \left( \log \left( \gamma_1 + \gamma_2 (f(Y) - B) + \rho_1 \frac{(Y - z)_+}{1 - \pi} \right) \right) + \alpha_1 + \alpha_2 + \rho_1 z - \lambda_1 - \rho_2(1 - \pi). \end{aligned}$$

Let  $(\boldsymbol{\lambda}, \boldsymbol{\gamma}, \boldsymbol{\rho}) = (\lambda_1, \lambda_2, \gamma_1, \gamma_2, \rho_1, \rho_2)$  and

$$S_3 = S \cap \left\{ (\boldsymbol{\lambda}, \boldsymbol{\gamma}, \boldsymbol{\rho}) : \min_y \lambda_1 + \lambda_2 (f(y) - B) \geq \left( \frac{\rho_1 y - \rho_2}{1 - \pi} \right)_+ \right\},$$

and

$$S_4 = S_3 \cap \left\{ (\boldsymbol{\lambda}, \boldsymbol{\gamma}, \boldsymbol{\rho}) \in S : \min_y \gamma_1 + \gamma_2 (f(y) - B) + \rho_1 \frac{(y - z)_+}{1 - \pi} \geq 0 \right\}.$$

Optimizing over the choice of  $\lambda_3(x)$ , and renaming  $\rho_2(1 - \pi)$  to  $\rho_2$ , we get

$$\begin{aligned} \min_{z \in \mathcal{R}} \max_{(\boldsymbol{\lambda}, \boldsymbol{\gamma}, \boldsymbol{\rho}) \in S_4} & \alpha_1 \mathbb{E}_{\eta_1} \left( \log \left( \lambda_1 + \lambda_2 (f(Y) - B) - \left( \frac{\rho_1 Y - \rho_2}{1 - \pi} \right)_+ \right) \right) + \alpha_1 + \alpha_2 - \lambda_1 - \gamma_1 \\ & + \alpha_2 \mathbb{E}_{\eta_2} \left( \log \left( \gamma_1 + \gamma_2 (f(Y) - B) + \rho_1 \frac{(Y - z)_+}{1 - \pi} \right) \right) - \alpha_1 \log \alpha_1 - \alpha_2 \log \alpha_2 - \rho_2 + \rho_1 z. \end{aligned} \tag{34}$$

Optimizing over the common scaling of the dual variables, the inner problem in (34) above can be re-written as

$$\begin{aligned} \max_{(\boldsymbol{\lambda}, \boldsymbol{\gamma}, \boldsymbol{\rho}) \in S_4} & \alpha_1 \mathbb{E}_{\eta_1} \left( \log \frac{\lambda_1 + \lambda_2 (f(Y) - B) - \left( \frac{\rho_1 Y - \rho_2}{1 - \pi} \right)_+}{\lambda_1 + \rho_2 - \rho_1 z + \gamma_1} \right) + (\alpha_1 + \alpha_2) \log (\alpha_1 + \alpha_2) \\ & + \alpha_2 \mathbb{E}_{\eta_2} \left( \log \frac{\gamma_1 + \gamma_2 (f(Y) - B) + \rho_1 \frac{(Y - z)_+}{1 - \pi}}{\lambda_1 + \rho_2 - \rho_1 z + \gamma_1} \right) - \alpha_1 \log \alpha_1 - \alpha_2 \log \alpha_2. \end{aligned}$$

Observe that as earlier,  $\lambda_1 + \rho_2 - \rho_1 z + \gamma_1 \geq 0$ . This follows from the conditions on the dual variables in  $S_4$  and complementary slackness conditions, which hold as the problem is convex optimization and satisfies strong duality (proved later).

Setting  $\tilde{\gamma}_1 = \lambda_1 + \rho_2 - \rho_1 z + \gamma_1$ , and  $\lambda_1 + \rho_2 = \tilde{\lambda}_1$  and substituting in the above expression and renaming the variables, we get

$$\begin{aligned} \max_{(\lambda, \gamma, \rho) \in S_5} & \alpha_1 \mathbb{E}_{\eta_1} \left( \log \left( \lambda_1 + \lambda_2 (f(Y) - B) - \rho_2 - \left( \frac{\rho_1 Y - \rho_2}{1 - \pi} \right)_+ \right) \right) - \alpha_1 \log \alpha_1 - \alpha_2 \log \alpha_2 \\ & + \alpha_2 \mathbb{E}_{\eta_2} \left( \log \left( 1 - \lambda_1 + \gamma_2 (f(Y) - B) + \rho_1 z + \rho_1 \frac{(Y - z)_+}{1 - \pi} \right) \right) + (\alpha_1 + \alpha_2) \log (\alpha_1 + \alpha_2), \end{aligned}$$

where  $S_5$  is given by intersection of the set  $S$  with the sets

$$\left\{ (\lambda, \gamma, \rho) : \min_y \left( \lambda_1 + \lambda_2 (f(y) - B) - \rho_2 - \left( \frac{\rho_1 y - \rho_2}{1 - \pi} \right)_+ \right) \geq 0 \right\},$$

and

$$\left\{ (\lambda, \gamma, \rho) : \min_y \left( 1 - \lambda_1 + \gamma_2 (f(Y) - B) + \rho_1 z + \rho_1 \frac{(Y - z)_+}{1 - \pi} \right) \geq 0 \right\}.$$

Re-parameterize again by setting  $\tilde{\lambda}_1 = \lambda_1 - 1/2$  and scaling every dual variable by  $1/2$ , we get the desired dual formulation.

It now suffices to show that both the primal and dual problems are feasible, and strong duality holds.

Consider  $(\lambda, \gamma, \rho)^1 = (1, 0, 0, 1, 0, 0, 0)$ . To show that dual is feasible, it suffices to show

$$\begin{aligned} \min_{\substack{\kappa_1 \in M^+ \\ \kappa_2 \in M^+}} L(\kappa_1, \kappa_2, W, (\lambda, \gamma, \rho)^1) &= \min_{\substack{\kappa_1 \in M^+ \\ \kappa_2 \in M^+}} \alpha_1 \text{KL}(\eta_1, \kappa_1) + \alpha_2 \text{KL}(\eta_2, \kappa_2) - 2 \\ &+ \int_{\mathbb{R}} d\kappa_1(y) + \int_{\mathbb{R}} d\kappa_2(y) > -\infty. \end{aligned}$$

Let  $\tilde{\kappa}_1$  and  $\tilde{\kappa}_2$  be the minimizers in the above expression. Then,  $\text{Supp}(\tilde{\kappa}_1) = \text{Supp}(\eta_1)$  and  $\text{Supp}(\tilde{\kappa}_2) = \text{Supp}(\eta_2)$ , and from (32) and (33),

$$\frac{d\tilde{\kappa}_1}{d\eta_1}(y) = \alpha_1 \quad \text{and} \quad \frac{d\tilde{\kappa}_2}{d\eta_2}(y) = \alpha_2.$$

We next argue the feasibility of primal problem, and show that strong duality holds. Consider  $\kappa_1 = \kappa_2 = p_1 \eta_1 + p_2 \eta_2 + (1 - p_1 - p_2) \delta_0$ , where,  $p_1, p_2 \in (0, 1)$  and  $\mathbb{E}_{\kappa_1}(f(X)) < B$ . Clearly,  $\text{KL}(\eta_1, \kappa_1) < \infty$  and  $\text{KL}(\eta_2, \kappa_2) < \infty$  and are feasible for the primal problem. Furthermore, the measures  $\tilde{\kappa}_1 = (1 - \epsilon) \delta_{-f^{-1}(B)} + \epsilon \delta_0$  and  $\tilde{\kappa}_2 = (\pi + \epsilon) \delta_0 + (1 - \pi - \epsilon) \delta_{f^{-1}(\frac{B}{\pi})}$  lie in the interior of the primal region. Hence, strong duality holds.

## E Description of the C-tracking rule of [27] used in Section 4

Recall that at each time  $n$ , the algorithm evaluates the optimization problem (5) for the projected empirical distribution vector, i.e., it computes  $V(\Pi(\hat{\mu}(n)))$ . Let  $t^*(\Pi(\hat{\mu}(n)))$  be a maximizer. In order to track these with some forced-exploration, for  $\zeta \in (0, \frac{1}{K}]$ , let  $t^\zeta(\Pi(\hat{\mu}(n)))$  be a  $L^\infty$  projection of  $t^*(\Pi(\hat{\mu}(n)))$  onto  $\Sigma_K^\zeta = \{(t_1, \dots, t_K) \in [\zeta, 1] : t_1 + \dots + t_K = 1\}$ . The algorithm sets  $\zeta_n = (K^2 + n)^{-\frac{1}{2}}/2$ , and chooses

$$A_{n+1} \in \operatorname{argmax}_{1 \leq a \leq K} \sum_{s=0}^n (t_a^{\zeta_s}(\Pi(\hat{\mu}(n))) - N_a(n)).$$

See [27, Section 3.1] for details of the C-tracking rule, and its properties.

## F Theoretical guarantees for the algorithm: Proof for Theorem 4.1

### F.1 Proof of Theorem 4.1: $\delta$ -correctness

In this section, we prove that the algorithm presented is  $\delta$ -correct, i.e., the first part of Theorem 4.1 holds. Recall that the error occurs when at the stopping time  $\tau_\delta$ , the arm with minimum CVaR is not arm 1. Let the event  $\{\hat{\mu}(n) \text{ suggests arm } j \text{ as answer}\}$  be denoted by  $\mathcal{E}_n(j)$ . Then, using the stopping rule in (7),  $\mathcal{E}$  is contained in

$$\left\{ \exists n : \bigcup_{i \neq 1} \left\{ \min_{a \neq i} \inf_{x \leq y} \{N_i(n) \text{KL}_{\inf}^U(\hat{\mu}_i(n), y) + N_a(n) \text{KL}_{\inf}^L(\hat{\mu}_a(n), x)\} \geq \beta; \mathcal{E}_n(i) \right\} \right\},$$

which is further contained in

$$\left\{ \exists n : \bigcup_{i \neq 1} \left\{ \inf_{x \leq y} \{N_i(n) \text{KL}_{\inf}^U(\hat{\mu}_i(n), y) + N_1(n) \text{KL}_{\inf}^L(\hat{\mu}_1(n), x)\} \geq \beta; \mathcal{E}_n(i) \right\} \right\}. \quad (35)$$

Clearly,  $x = c_\pi(\mu_1)$  and  $y = c_\pi(\mu_i)$  are feasible for the infimum problem above. Using these with the union bound, the probability of the error event is bounded by

$$\sum_{i=2}^K \mathbb{P}(\exists n : N_i(n) \text{KL}_{\inf}^U(\hat{\mu}_i(n), c_\pi(\mu_i)) + N_1(n) \text{KL}_{\inf}^L(\hat{\mu}_1(n), c_\pi(\mu_1)) \geq \beta). \quad (36)$$

Whence, it is sufficies to show that each summand in (36) is at most  $\frac{\delta}{K-1}$ .

Recall that  $f^{-1}(c) = \max\{y : f(y) = c\} = c^{\frac{1}{1+\epsilon}}$ , and for  $v \in D^o = \left(-f^{-1}(B), f^{-1}\left(\frac{B}{1-\pi}\right)\right)$ ,  $x_0 \in C = \left[-f^{-1}\left(\frac{B}{\pi}\right), v\right]$ ,

$$\hat{S}(v) := \{\lambda_1 \geq 0, \lambda_2 \in \mathbb{R}, \lambda_3 \geq 0 : \forall x \in \mathbb{R}, g^U(x, \boldsymbol{\lambda}, v) \geq 0\},$$

and

$$\mathcal{R}_2(x_0, v) := \{\gamma_1 \geq 0, \gamma_2 \geq 0 : \forall y \in \mathbb{R}, g^L(y, \boldsymbol{\gamma}, v, x_0) \geq 0\},$$

where,

$$g^U(X, \boldsymbol{\lambda}, v) = 1 + \lambda_1 v - \lambda_2(1 - \pi) + \lambda_3(f(X) - B) - \left(\frac{\lambda_1 X}{1 - \pi} - \lambda_2\right)_+,$$

and

$$g^L(X, \boldsymbol{\gamma}, v, x_0) = 1 - \gamma_1 \left(v - x_0 - \frac{(X - x_0)_+}{1 - \pi}\right) - \gamma_2(B - f(X)).$$

Clearly,  $g^U$  and  $g^L$  are concave functions of  $\boldsymbol{\lambda}$  and  $\boldsymbol{\gamma}$ . Recall from Theorems 3.4 that for each arm  $i$ ,

$$N_i(n) \text{KL}_{\inf}^U(\hat{\mu}_i(n), c_\pi(\mu_i)) = \max_{\boldsymbol{\lambda} \in \hat{S}(c_\pi(\mu_i))} \sum_{j=1}^{N_i(n)} \log(g^U(X_j^i, \boldsymbol{\lambda}, c_\pi(\mu_i))), \quad (37)$$

and

$$N_i(n) \text{KL}_{\inf}^L(\hat{\mu}_i(n), c_\pi(\mu_i)) \leq \max_{\boldsymbol{\gamma} \in \mathcal{R}_2(x_\pi(\mu_i), c_\pi(\mu_i))} \sum_{j=1}^{N_i(n)} \log(g^L(X_j^i, \boldsymbol{\gamma}, c_\pi(\mu_i), x_\pi(\mu_i))), \quad (38)$$

where,  $X_j^i : j \in \{1, \dots, N_i(n)\}$  are samples from  $\mu_i$ .

The following lemma bounds the maximum of a sum of exp-concave functions, i.e., functions whose exponentials are concave. It is essentially the regret bound for the continuous exponentially weighted average predictor, which was shown for the core portfolio optimisation case by [10] and stated in general by [29, Theorem 7].

**Lemma F.1.** *Let  $\Lambda \subseteq \mathbb{R}^d$  be a compact and convex subset and  $q$  be the uniform distribution on  $\Lambda$ . Let  $g_t : \Lambda \rightarrow \mathbb{R}$  be any series of exp-concave functions. Then*

$$\max_{\boldsymbol{\lambda} \in \Lambda} \sum_{t=1}^T g_t(\boldsymbol{\lambda}) \leq \log \mathbb{E}_{\boldsymbol{\lambda} \sim q} \left( e^{\sum_{t=1}^T g_t(\boldsymbol{\lambda})} \right) + d \log(T+1) + 1.$$

Let  $q_{1i}$  be a uniform prior on the set  $\hat{S}(c_\pi(\mu_i))$ , and  $q_{2i}$  be the uniform prior on the set  $\mathcal{R}_2(x_\pi(\mu_i), c_\pi(\mu_i))$ . See Sections D.3 and D.4 for a discussion on the possibility of having uniform priors on these sets. For samples  $X_j^i : j \in \{1, \dots, N_i(n)\}$ , define

$$L_i(n) = \mathbb{E}_{\gamma \sim q_{2i}} \left( \prod_{j=1}^{N_i(n)} g^L(X_j^i, \gamma, c_\pi(\mu_i), x_\pi(\mu_i)) \mid X_1^i, \dots, X_{N_i(n)}^i \right),$$

and

$$U_i(n) = \mathbb{E}_{\lambda \sim q_{1i}} \left( \prod_{j=1}^{N_i(n)} g^U(X_j^i, \lambda, c_\pi(\mu_i)) \mid X_1^i, \dots, X_{N_i(n)}^i \right).$$

Then, using Lemma F.1 with  $g_t(\lambda) = \log g^U(X_t, \lambda, c_\pi(\mu_i))$ ,  $d = 3$ , and (37), on each sample path, we have

$$N_i(n) \text{KL}_{\text{inf}}^U(\hat{\mu}_i(n), c_\pi(\mu_i)) \leq \log U_i(n) + 3 \log(N_i(n) + 1) + 1.$$

Also using Lemma F.1 with  $g_t(\gamma) = g^L(X_t, \gamma, c_\pi(\mu_i), x_\pi(\mu_i))$ ,  $d = 2$ , (38) and Remark D.1, on each sample path,

$$N_i(n) \text{KL}_{\text{inf}}^L(\hat{\mu}_i(n), c_\pi(\mu_i)) \leq \log L_i(n) + 2 \log(N_i(n) + 1) + 1, \quad \text{a.s.}$$

For each arm  $i$ , let

$$Y_i^L(n) = N_i(n) \text{KL}_{\text{inf}}^L(\hat{\mu}_i(n), c_\pi(\mu_i)) - 2 \log(N_i(n) + 1) - 1. \quad (39)$$

and

$$Y_i^U(n) = N_i(n) \text{KL}_{\text{inf}}^U(\hat{\mu}_i(n), c_\pi(\mu_i)) - 3 \log(N_i(n) + 1) - 1. \quad (40)$$

Then we have that

$$e^{Y_i^L(n)} \leq L_i(n) \quad \text{and} \quad e^{Y_i^U(n)} \leq U_i(n), \quad \text{a.s.}$$

Furthermore, it is easy to verify that for each arm  $i$ ,  $L_i(n)$  and  $U_i(n)$  are non-negative, super-martingales satisfying  $\mathbb{E}(U_i(n)) \leq 1$  and  $\mathbb{E}(L_i(n)) \leq 1$ . Thus,  $U_i(n)L_1(n)$  is a non-negative super-martingale with mean at most 1, and satisfies that the event

$$\{\exists n : N_i(n) \text{KL}_{\text{inf}}^U(\hat{\mu}_i(n), c_\pi(\mu_i)) + N_1(n) \text{KL}_{\text{inf}}^L(\hat{\mu}_1(n), c_\pi(\mu_1)) \geq \beta(n, \delta)\}$$

is contained in

$$\left\{ \exists n : L_1(n)U_i(n) \geq \frac{K-1}{\delta} \right\}.$$

Using Ville's inequality (see, [55]), the probability of the above event is bounded by  $\frac{\delta}{K-1}$ .  $\square$

### F.1.1 Proof of Lemma F.1

Recall that  $q$  is uniform over  $\Lambda$ . Let  $\lambda^*$  denote the maximizer for  $\max_{\lambda \in \Lambda} \sum_{t=1}^T g_t(\lambda)$ . Then, for any distribution  $r$  over  $\Lambda$ , Donsker-Varadhan variational form for  $\text{KL}(r, q)$  gives that

$$\max_{\lambda \in \Lambda} \sum_{t=1}^T g_t(\lambda) \leq \text{KL}(r, q) + \sum_{t=1}^T \mathbb{E}_{\lambda \sim r} (g_t(\lambda^*) - g_t(\lambda)) + \log \mathbb{E}_{\lambda \sim q} \left( e^{\sum_{t=1}^T g_t(\lambda)} \right). \quad (41)$$

Fix  $\alpha \in (0, 1)$ . Define the set  $\tilde{\Lambda} = \{\alpha\lambda^* + (1-\alpha)\lambda_0 : \lambda_0 \in \Lambda\}$ , and choose  $r$  to be uniform over  $\tilde{\Lambda}$ . Then,  $\text{KL}(r, q) = -d \log(1-\alpha)$ . Moreover, since  $e^{g_t}$  is concave, for  $\lambda \in \tilde{\Lambda}$  such that  $\lambda = \alpha\lambda^* + (1-\alpha)\lambda_0$ ,

$$e^{g_t(\lambda)} \geq \alpha e^{g_t(\lambda^*)} + (1-\alpha)e^{g_t(\lambda_0)} \geq \alpha e^{g_t(\lambda^*)}.$$

Taking negative logarithm of the above inequality, we get  $g_t(\lambda^*) - g_t(\lambda) \leq -\log \alpha$ , for all  $\lambda \in \tilde{\Lambda}$ . Using this and the bound for  $\text{KL}(r, q)$  in (41), along with setting  $\alpha = \frac{T}{T+d}$ , we get

$$\max_{\lambda \in \Lambda} \sum_{t=1}^T g_t(\lambda) \leq (T+d)H_2\left(\frac{T}{T+d}\right) + \log \mathbb{E}_{\lambda \sim q} \left( e^{\sum_{t=1}^T g_t(\lambda)} \right),$$

where  $H_2(a)$  is the entropy of Bernoulli(a) random variable. The required inequality then follows by observing that  $(T+d)H_2\left(\frac{T}{T+d}\right) \leq d \log(T+1) + 1$ .  $\square$

## F.2 Sample complexity

We now prove that the sample complexity of the algorithm matches the lower bound asymptotically, as  $\delta \rightarrow 0$ , i.e., it satisfies

$$\limsup_{\delta \rightarrow 0} \frac{\mathbb{E}_\mu(\tau_\delta)}{\log \frac{1}{\delta}} \leq \frac{1}{V(\mu)}.$$

The proof works for any projection map  $\Pi$ , which is continuous at  $\mathcal{L}$ . However, we give proof for the map that projects onto the element in  $\mathcal{L}$  which is closest in the Kolmogorov metric, i.e.,  $\Pi = (\Pi_1, \Pi_2, \dots, \Pi_K)$ , where

$$\Pi_i(\eta) \in \operatorname{argmin}_{\kappa \in \mathcal{L}} d_K(\kappa, \eta), \quad \text{and} \quad d_K(\kappa, \eta) = \sup_{x \in \mathfrak{R}} |F_\kappa(x) - F_\eta(x)|,$$

and  $F_\kappa$  and  $F_\eta$  denote the CDF functions for the measures  $\eta$  and  $\kappa$ .

Let  $\epsilon' > 0$  and  $n \in \mathbb{N}$ . Define  $\mathcal{I}_{\epsilon'} \triangleq B_\zeta(\mu_1) \times B_\zeta(\mu_2) \times \dots \times B_\zeta(\mu_K)$ , where  $B_\zeta(\mu_i) = \{\kappa \in \mathcal{P}(\mathfrak{R}) : d_K(\kappa, \mu_i) \leq \zeta\}$ , and  $\zeta > 0$  is chosen to satisfy the following:

$$\mu' \in \mathcal{I}_{\epsilon'} \implies \forall t' \in t^*(\Pi(\mu')), \exists t \in t^*(\mu) \text{ s.t. } \|t' - t\|_\infty \leq \epsilon'.$$

Observe that for  $\zeta \rightarrow 0$ , probability measures in  $B_\zeta(\mu_i)$  weakly converge to  $\mu_i$ , for all  $i$ . Also, for all  $\kappa \in B_\zeta(\mu_i)$ ,  $d_K(\kappa, \mu_i) \leq \zeta$  which implies that  $d_K(\Pi(\kappa), \kappa) \leq \zeta$ , and hence,  $d_K(\Pi(\kappa), \mu_i) \leq 2\zeta$ , where the last inequality follows from triangle inequality for  $d_K$ .

Recall that  $\mu \in \mathcal{M}$  is such that  $-f^{-1}(B) < c_\pi(\mu_1) < \max_{j \neq 1} c_\pi(\mu_j) < f^{-1}\left(\frac{B}{1-\pi}\right)$ , where  $f^{-1}(c) := \max\{y : f(y) = c\}$ . Existence of  $\zeta = \zeta(\epsilon)$  is then guaranteed by the upper-hemicontinuity of the set  $t^*(\mu)$  (Lemma 3.3). See, [21, Theorem 9] for a proof in the parametric setting, when the optimal proportions are only upper-hemicontinuous.

For  $T \in \mathbb{N}$ , set  $l_0(T) = T^{1/4}$ , and define

$$\mathcal{G}_T(\epsilon') = \bigcap_{n=l_0(T)}^T \{\hat{\mu}(n) \in \mathcal{I}_{\epsilon'}\}.$$

Let  $\mu'$  be a vector of  $K$ , 1-dimensional distributions from  $\mathcal{P}(\mathfrak{R})$ ,  $[K] = \{1, \dots, K\}$ , and let  $t' \in \Sigma_K$ . Define

$$g(\mu', t') \triangleq \max_{a \in [K]} \min_{b \neq a} \inf_{x \in [-f^{-1}(B), f^{-1}(\frac{B}{1-\pi})]} (t'_a \text{KL}_{\inf}^U(\mu'_a, x) + t'_b \text{KL}_{\inf}^L(\mu'_b, x)).$$

Note that, for  $\mu \in (\mathcal{P}(\mathfrak{R}))^K$ , from Lemma C.3 and Berge's Theorem (see, [8, Theorem 2, Page 116]),  $g(\mu, t)$  is a jointly lower-semicontinuous function of  $(\mu, t)$ . Let  $\|\cdot\|_\infty$  be the maximum norm in  $\mathfrak{R}^K$ , and

$$C_{\epsilon'}^*(\mu) \triangleq \inf_{\substack{\mu' \in \mathcal{I}_{\epsilon'} \\ t' : \inf_{t \in t^*(\mu)} \|t' - t\|_\infty \leq 4\epsilon'}} g(\mu', t').$$

From Lemma F.4, for  $T \geq T_{\epsilon'}$ , on  $\mathcal{G}_T(\epsilon')$ , for  $t \geq T^{1/4}$ , the modified log generalized likelihood ratio statistic for  $\hat{\mu}(n)$ , used in the stopping rule, is given by  $Z(n) = \max_a \min_{b \neq a} Z_{a,b}(n)$ , where

$$Z_{a,b}(n) = n \inf_{x \in [-f^{-1}(B), f^{-1}(\frac{B}{1-\pi})]} \left( \frac{N_a(n)}{n} \text{KL}_{\inf}^U(\hat{\mu}_a(n), x) + \frac{N_b(n)}{n} \text{KL}_{\inf}^L(\hat{\mu}_b(n), x) \right).$$

In particular, on  $\mathcal{G}_T(\epsilon')$ , for  $T \geq T_{\epsilon'}$  and  $n \geq l_0(T)$ ,

$$\begin{aligned} Z(n) &= n \max_a \min_{b \neq a} \inf_{x \in [-f^{-1}(B), f^{-1}(\frac{B}{1-\pi})]} \left( \frac{N_a(n)}{n} \text{KL}_{\inf}^U(\hat{\mu}_a(n), x) + \frac{N_b(n)}{n} \text{KL}_{\inf}^L(\hat{\mu}_b(n), x) \right) \\ &= n g\left(\hat{\mu}(n), \left\{ \frac{N_1(n)}{n}, \dots, \frac{N_K(n)}{n} \right\}\right) \\ &\geq n C_{\epsilon'}^*(\mu). \end{aligned}$$

Furthermore, the stopping time is at most  $\inf \{n \geq l_0(T) : Z(n) \geq \beta(n, \delta), l \in \mathbb{N}\}$ . For  $T \geq T_{\epsilon'}$ , on  $\mathcal{G}_T(\epsilon')$ ,

$$\begin{aligned}
\min\{\tau_\delta, T\} &\leq \sqrt{T} + \sum_{l=\sqrt{T}+1}^T \mathbf{1}(t < \tau_\delta) \\
&\leq \sqrt{T} + \sum_{l=\sqrt{T}+1}^T \mathbf{1}(Z(l) < \beta(l, \delta)) \\
&\leq \sqrt{T} + \sum_{l=\sqrt{T}+1}^T \mathbf{1}\left(l < \frac{\beta(l, \delta)}{C_{\epsilon'}^*(\mu)}\right) \\
&\leq \sqrt{T} + \frac{\beta(T, \delta)}{C_{\epsilon'}^*(\mu)}.
\end{aligned} \tag{42}$$

Define,

$$T_0(\delta) = \inf \left\{ l \in \mathbb{N} : \sqrt{l} + \frac{\beta(l, \delta)}{C_{\epsilon'}^*(\mu)} \leq l \right\}.$$

On  $\mathcal{G}_T$ , for  $T \geq \max\{T_0(\delta), T_{\epsilon'}\}$ , from (42) and definition of  $T_0(\delta)$ ,

$$\min\{\tau_\delta, T\} \leq \sqrt{T} + \frac{\beta(T, \delta)}{C_{\epsilon'}^*(\mu)} \leq T,$$

which gives that for such a  $T$ ,  $\tau_\delta \leq T$ . Thus, for  $T \geq T_0(\delta)$ , we have  $\mathcal{G}_T(\epsilon') \subset \{\tau_\delta \leq T\}$  and hence,  $\mathbb{P}_\mu(\tau_\delta > T) \leq \mathbb{P}_\mu(\mathcal{G}_T^c)$ . Since  $\tau_\delta \geq 0$ ,

$$\mathbb{E}_\mu(\tau_\delta) \leq T_0(\delta) + T_{\epsilon'} + \sum_{T=T_0(\delta)+1}^{\infty} \mathbb{P}_\mu(\mathcal{G}_T^c(\epsilon')). \tag{43}$$

For  $\tilde{\epsilon} > 0$ , it can be shown that

$$\limsup_{\delta \rightarrow 0} \frac{T_0(\delta)}{\log(1/\delta)} \leq \frac{(1 + \tilde{\epsilon})}{C_{\epsilon'}^*(\mu)}. \tag{44}$$

Then, from (43), (44), and Lemma F.5,

$$\limsup_{\delta \rightarrow 0} \frac{\mathbb{E}_\mu(\tau_\delta)}{\log(1/\delta)} \leq \frac{(1 + \tilde{\epsilon})}{C_{\epsilon'}^*(\mu)}.$$

From lower-semicontinuity of  $g(\mu', t')$  in  $(\mu', t')$  for  $\mu' \in (\mathcal{P}(\mathbb{R}))^K$ , it follows that  $\liminf_{n \rightarrow \infty} C_{\epsilon'}^*(\mu) \geq V(\mu)$ . First letting  $\tilde{\epsilon} \rightarrow 0$  and then letting  $\epsilon' \rightarrow 0$ , we get

$$\limsup_{\delta \rightarrow 0} \frac{\mathbb{E}_\mu(\tau_\delta)}{\log(1/\delta)} \leq \frac{1}{V(\mu)}.$$

**Lemma F.2** ([27], Lemma 7). *For  $n \geq 1$  and  $a \in [K]$ , the C-tracking rule ensures that  $N_a(n) \geq \sqrt{n + K^2} - 2K$  and that*

$$\max_{a \in [K]} \left| N_a(n) - \sum_{s=0}^{n-1} t_a(s) \right| \leq K(1 + \sqrt{n}), \quad \text{where } t(s) \in t^*(\Pi(\hat{\mu}(s))).$$

**Lemma F.3** ([21], Lemma 33). *Let  $\epsilon > 0$  and  $A \subset \Sigma_K$  be a convex set and let  $t(1), t(2), \dots, t(n) \in \Sigma_K$  be such that for  $s \in \{1, \dots, n\}$ ,  $\inf_{t \in A} \|t(s) - t\|_\infty \leq \epsilon'$ . Then  $\inf_{t \in A} \|\frac{1}{n} \sum_{s=1}^n t(s) - t\|_\infty \leq \epsilon$ .*

**Lemma F.4.** *For  $\epsilon' > 0$ , there exists a constant  $T'_\epsilon$  such that for  $T \geq T_{\epsilon'}$ , it holds that on  $\mathcal{G}_T$  for tracking rule*

$$\forall n \geq \sqrt{T}, \quad \inf_{t^* \in t^*(\mu)} \max_{a \in [K]} \left| \frac{N_a(n)}{n} - t_a^* \right| \leq 3\epsilon'.$$

*Proof.* The proof follows along the lines of [27, Lemma 20] and [21, Lemma 35]. For any  $n \geq \sqrt{T} = l_0(T)$ , using the Lemma F.2, for all  $a$ ,

$$\begin{aligned} \inf_{t \in t^*(\mu)} \max_{a \in [K]} \left| \frac{N_a(n)}{n} - t_a \right| &\leq \max_{a \in [K]} \left| \frac{N_a(n)}{n} - \frac{1}{n} \sum_{s=0}^{n-1} t_a(s) \right| + \inf_{t \in t^*(\mu)} \max_{a \in [K]} \left| \frac{1}{n} \sum_{s=0}^{n-1} t_a(s) - t_a \right| \\ &\leq \frac{K(1 + \sqrt{n})}{n} + \frac{l_0(T)}{n} + \inf_{t \in t^*(\mu)} \left\| \frac{1}{n} \sum_{s=l_0(T)}^{n-1} (t(s) - t) \right\|_{\infty}. \end{aligned}$$

On the set  $\mathcal{G}_T$ , from the definition of this set, for all  $n \geq l_0(T)$ ,  $\forall t' \in t^*(\Pi(\hat{\mu}(n)))$ ,  $\inf_{t \in t^*(\mu)} \|t' - t\|_{\infty} \leq \epsilon'$ . Since  $t^*(\mu)$  is a convex set, by Lemma F.3, the last term in the expression above is at most  $\epsilon'$ . Thus,

$$\inf_{t \in t^*(\mu)} \max_{a \in [K]} \left| \frac{N_a(n)}{n} - t_a \right| \leq \frac{2K}{l_0(T)} + \frac{1}{l_0(T)} + \epsilon' \leq 3\epsilon',$$

for  $T \geq ((2K + 1)/2\epsilon')^4$ . □

**Lemma F.5.**

$$\limsup_{\delta \rightarrow 0} \frac{\sum_{T=1}^{\infty} \mathbb{P}_{\mu}(\mathcal{G}_T^c(\epsilon'))}{\log(1/\delta)} = 0.$$

*Proof.* Recall that for  $T \in \mathbb{N}$ ,  $l_0(T) = T^{1/4}$ , and

$$\mathcal{G}_T(\epsilon') = \bigcap_{n=l_0(T)}^T \{ \hat{\mu}(n) \in \mathcal{I}_{\epsilon'} \}.$$

Using union bounds,

$$\mathbb{P}_{\mu}(\mathcal{G}_T^c(\epsilon')) \leq \sum_{l=l_0(T)}^T \mathbb{P}_{\mu}(\hat{\mu}(l) \notin \mathcal{I}_{\epsilon'}) \leq \sum_{l=l_0(T)}^T \sum_{a=1}^K \mathbb{P} \left( \sup_x |F_{\hat{\mu}_a(l)}(x) - F_a(x)| \geq \epsilon' \right).$$

From Lemma F.2, C-Tracking ensures at least  $\sqrt{l}/2$  samples to each arm till time  $l$ . Using this, each summand in the above can be bounded as follows:

$$\mathbb{P} \left( \sup_x |F_{\hat{\mu}_a(l)}(x) - F_a(x)| \geq \epsilon' \right) \leq \mathbb{P} \left( \sup_x |F_{\hat{\mu}_a(l)}(x) - F_a(x)| \geq \epsilon'; N_a(l) \geq \frac{\sqrt{l}}{2} \right).$$

R.h.s. in the above inequality can be bounded using union bound and DKW inequality by

$$\sum_{j=\sqrt{l}/2}^l e^{-2j\epsilon'^2} = e^{-\epsilon'^2\sqrt{l}} \left( 1 - e^{-2\epsilon'^2} \right)^{-1}.$$

Thus,

$$\mathbb{P}_{\mu}(\mathcal{G}_T^c(\epsilon)) \leq KTe^{-\epsilon'^2 T^{1/8}} \left( 1 - e^{-2\epsilon'^2} \right)^{-1},$$

completing the proof. □

## G Computing the projection in Kolmogorov metric

In this section, we describe a method for computing the projection of  $F$  (where the typical application has  $F$  as the empirical CDF) onto  $\mathcal{L}$  in the Kolmogorov metric, i.e.

$$\operatorname{argmin}_{G: \mathbb{E}_G(f(X)) \leq B} d_K(F, G),$$

where recall that

$$d_K(F, G) := \sup_{x \in \mathbb{R}} |F(x) - G(x)|.$$

To project  $F$  onto  $\mathcal{L}$  in the Kolmogorov metric, we will essentially relocate equal mass from the extreme left and right tails to 0. This is because relocating some mass, say  $\xi$ , from points in the right tail already incurs  $\xi$  cost in the Kolmogorov metric (observe the shift in the CDF at 0 due to this mass). Thus relocating an equal mass from points in the left tail to 0 is for free in the metric under consideration. However, if the left tail does not have the required  $\xi$  mass, then the additional mass needed to bring down the  $(1 + \epsilon)^{th}$  moment will only be relocated from points in the right tail. Lemma G.1 essentially shows that there exists a projection of  $F$  on  $\mathcal{L}$  which satisfies this.

**Lemma G.1.** *There exists  $z \geq 0$  such that an optimal measure in  $\mathcal{L}$  has CDF of the following form:*

$$G_z(x) = \begin{cases} \max\{0, F(x) - z\}, & \text{for } x < 0 \\ \min\{1, F(x) + z\}, & \text{for } x \geq 0. \end{cases}$$

*Proof.* Let  $G^*$  be a minimiser, and let  $z = d_K(F, G^*)$ . Clearly,  $G_z$  as defined above is a CDF, and  $d_K(F, G_z) \leq z$ . It then suffices to show that  $G_z$  is also a feasible solution, i.e.,  $\mathbb{E}_{G_z}(|X|^{1+\epsilon}) \leq B$ .

For  $\epsilon > 0$ , since  $f(x) = |x|^{1+\epsilon}$  is a non-negative function, and  $f^{-1}(c) := \max\{y : f(y) = c\}$ ,

$$\begin{aligned} \mathbb{E}_{G_z}(f(X)) &= \int_{x \geq 0} \mathbb{P}_{G_z}(f(X) \geq x) dx \\ &= \int_{x \geq 0} \mathbb{P}_{G_z}(X \geq f^{-1}(x)) dx + \int_{x \geq 0} \mathbb{P}_{G_z}(X \leq -f^{-1}(x)) dx. \end{aligned} \quad (45)$$

Since  $d_K(F, G^*) \leq z$ ,

$$G^*(x) \geq G_z(x), \text{ for } x < 0 \quad \text{and} \quad G^*(x) \leq G_z(x), \text{ for } x \geq 0.$$

Using this in (45), we have that

$$\mathbb{E}_{G_z}(f(X)) \leq \int_{x \geq 0} \mathbb{P}_{G^*}(X \geq f^{-1}(x)) dx + \int_{x \geq 0} \mathbb{P}_{G^*}(X \leq -f^{-1}(x)) dx = \mathbb{E}_{G^*}(f(X)),$$

which is bounded from above by  $B$ , as desired.  $\square$

Since there is an optimizer of the specific form considered in Lemma G.1, to compute the projection, it suffices to search over only such probability measures. Hence, it only remains to compute the smallest  $z$  for which  $G_z \in \mathcal{L}$  is feasible. We can see from the expression in (45) that  $\mathbb{E}_{X \sim G_z}[f(X)]$  is a convex, decreasing function of  $z$ , which is moreover piecewise linear for discrete (i.e. empirical)  $F$ . This means we can use many techniques to find the argument  $z$  for which it first reaches 0 (binary search, Newton, explicitly enumerating the segments/knots, etc.).

## H Discussion on the VaR problem

In the main text, we mainly focused on the minimum CVaR arm identification problem. In this section we formally present the ideas for the analogous approach of the optimum VaR arm identification problem. As before, our treatment is based on the lower bound problem. In this section we will not (need to) impose a moment constraint, i.e.,  $\mu \in \mathcal{P}(\mathbb{R})$ , as the VaR lower bound is defined without it. The main object of study is the optimization problem that appears in the lower bound, given below:

$$V(\mu) = \sup_{t \in \Sigma_K} \inf_{\nu \in \mathcal{A}_1^c} \sum_{a=1}^K t_a \text{KL}(\mu_a, \nu_a), \text{ and } \mathcal{A}_j^c = \tilde{\mathcal{M}} \setminus \mathcal{A}_j \quad (46)$$

where  $\tilde{\mathcal{M}} \subset \mathcal{P}(\mathbb{R})^K$  is the set of all bandit models with a unique best VaR arm, and  $\mathcal{A}_j \subseteq \tilde{\mathcal{M}}$  is the set of bandit models with  $j$  being the arm of lowest VaR.

Recall that for a distribution  $\eta$ , VaR at quantile  $\pi$ , denoted as  $x_\pi(\eta)$ , is defined as

$$x_\pi(\eta) = \inf\{x \in \mathbb{R} : F_\eta(x) \geq \pi\}.$$

As in the CVaR case, for  $\mu \in \tilde{\mathcal{M}}$ , (46) can be shown to simplify as

$$V(\mu) = \sup_{t \in \Sigma_K} \min_{b \neq 1} \inf_y \{t_1 \text{KL}_{\inf}^U(\mu_1, y) + t_b \text{KL}_{\inf}^L(\mu_b, y)\},$$

where  $\text{KL}_{\inf}^L$  and  $\text{KL}_{\inf}^U$  are defined similar to (1) earlier, with the CVaR constraints replaced with the corresponding VaR constraints, and are given as:

$$\text{KL}_{\inf}^U(\eta, y) := \min_{\kappa \in \mathcal{P}(\mathfrak{R}): x_\pi(\kappa) \geq y} \text{KL}(\eta, \kappa) \quad \text{and} \quad \text{KL}_{\inf}^L(\eta, y) := \min_{\kappa \in \mathcal{P}(\mathfrak{R}): x_\pi(\kappa) \leq y} \text{KL}(\eta, \kappa). \quad (47)$$

Let  $x_\pi^+(\eta) := \sup \{x \in \mathfrak{R} : F_\eta(x) \leq \pi\}$ . Then the set of  $\pi^{th}$ -quantiles for the distribution  $\eta$  is given by  $(x_\pi(\eta), x_\pi^+(\eta))$ .

**Remark H.1.** We assume that the given bandit problem,  $\mu$ , has the set of  $\pi^{th}$ -quantiles disjoint from that of every other arm distribution, as otherwise the bandit instance is not learnable. To see this, fix  $\pi = 0.8$  and consider a two-armed bandit problem,  $\mu$ , where  $\mu_1 = \text{Ber}(0.2)$  and  $\mu_2 = \text{Ber}(0.2 + \epsilon)$ , for an arbitrarly small  $\epsilon > 0$ . Then  $x_\pi(\mu_1) = 0$ ,  $x_\pi^+(\mu_1) = 1$ , and  $x_\pi(\mu_2) = 1$ . Clearly  $V(\mu) = 0$ , whence,  $\mu$  is unlearnable.

Let us now understand some structural properties of the  $\text{KL}_{\inf}$  functionals which will be helpful for proving  $\delta$ -correctness and optimality of the proposed algorithm. For a probability measure  $\eta$ , let  $F_\eta(x) := \eta((-\infty, x])$ , denote its CDF evaluated at  $x$  and  $F_\eta^-(x) = \lim_{y \uparrow x} F_\eta(y)$  denote the left limit of the CDF of  $\eta$ . Moreover, for  $p, q \in (0, 1)$  let  $d_2(p, q)$  denote the KL divergence between the Bernoulli random variables with mean  $p$  and  $q$ .

**Lemma H.1** (Restating Lemma 4.4). *For  $y \in \mathfrak{R}$ ,*

$$\text{KL}_{\inf}^L(\eta, y) = d_2(\min \{F_\eta(y), \pi\}, \pi) \quad \text{and} \quad \text{KL}_{\inf}^U(\eta, y) = d_2(\max \{F_\eta^-(y), \pi\}, \pi).$$

*Proof.* Recall that  $\text{KL}_{\inf}^L(\eta, y)$  and  $\text{KL}_{\inf}^U(\eta, y)$  equal the optimal values of the following problems, respectively:

$$\min \text{KL}(\eta, \kappa) \quad \text{s.t.} \quad \kappa \in \mathcal{P}(\mathfrak{R}), \quad F_\kappa(y) \geq \pi, \quad 1 - F_\kappa(y) \leq 1 - \pi, \quad (48)$$

and

$$\min \text{KL}(\eta, \kappa) \quad \text{s.t.} \quad \kappa \in \mathcal{P}(\mathfrak{R}), \quad F_\kappa^-(y) \leq \pi, \quad 1 - F_\kappa^-(y) \geq 1 - \pi. \quad (49)$$

Clearly,

$$\text{KL}(\eta, \kappa) = \int_{-\infty}^y \left( \frac{d\eta}{d\kappa}(x) \log \frac{d\eta}{d\kappa}(x) \right) d\kappa(x) + \int_{y^+}^{\infty} \left( \frac{d\eta}{d\kappa}(x) \log \frac{d\eta}{d\kappa}(x) \right) d\kappa(x),$$

where the first term in the summation above equals

$$F_\eta(y) \int_{-\infty}^y \frac{d\eta/F_\eta(y)}{d\kappa/F_\kappa(y)}(x) \log \left( \frac{d\eta/F_\eta(y)}{d\kappa/F_\kappa(y)}(x) \right) \frac{d\kappa(x)}{F_\kappa(y)} + F_\eta(y) \log \frac{F_\eta(y)}{F_\kappa(y)},$$

which can be lower bounded using Jensen's inequality by

$$F_\eta(y) \log \frac{F_\eta(y)}{F_\kappa(y)}.$$

Similarly, the second term in the definition of  $\text{KL}(\eta, \kappa)$  above can be lower bounded by

$$(1 - F_\eta(y)) \log \frac{1 - F_\eta(y)}{1 - F_\kappa(y)},$$

giving

$$\text{KL}(\eta, \kappa) \geq d_2(F_\eta(y), F_\kappa(y)). \quad (50)$$

Let  $\text{Supp}(\eta)$  denote the support of measure  $\eta$ . Consider  $\kappa^*$  defined below.

$$\kappa^*(x) \triangleq \begin{cases} \eta(x)\pi(\min\{\pi, F_\eta(y)\})^{-1}, & \text{for } x \in \{x : x \leq y\}, \\ \eta(x)(1-\pi)(1-\min\{\pi, F_\eta(y)\})^{-1}, & \text{for } x \in \{x : x > y\}, \end{cases}$$

and  $\kappa^*(x) \geq 0$  for  $x \leq y$  such that  $x \notin \text{Supp}(\eta)$ , if  $\{x : x \leq y\} \cap \text{Supp}(\eta) = \emptyset$ .

Clearly,  $\kappa^*$  satisfies the constraints of 48 and is feasible to the  $\text{KL}_{\text{inf}}^L(\eta, y)$  problem. Moreover,

$$\text{KL}(\eta, \kappa^*) = d_2(\min\{\pi, F_\eta(y)\}, \pi) \leq d_2(F_\eta(y), F_{\kappa^*}(y)),$$

where the inequality above follows from the monotonicity of  $d_2$  in the second argument. This, along with the bound in (50) implies that the above inequality holds as an equality. Whence,  $\kappa^*$  is optimal for  $\text{KL}_{\text{inf}}^L(\eta, y)$  problem, and we get the desired equality for  $\text{KL}_{\text{inf}}^L(\eta, y)$ .

The equality for the  $\text{KL}_{\text{inf}}^U(\eta, y)$  problem can be argued similarly using  $\zeta^*$  defined below:

$$\zeta^*(x) = \begin{cases} \eta(x)\pi(\max\{\pi, F_\eta^-(y)\})^{-1} & \text{for } x \in \{x : x < y\} \\ \eta(x)(1-\pi)(1-\max\{\pi, F_\eta^-(y)\})^{-1} & \text{for } x \in \{x : x \geq y\}, \end{cases}$$

and  $\zeta^*(x) \geq 0$  for  $x \geq y$  and  $x \notin \text{Supp}(\eta)$ , if  $\{x : x \geq y\} \cap \text{Supp}(\eta) = \emptyset$ .  $\square$

Thus,  $V(\mu)$  in the lower bound equals

$$\sup_{t \in \Sigma_K} \min_{b \neq 1} \inf_y \left\{ t_1 d_2(\max\{\pi, F_{\mu_1}^-(y)\}, \pi) + t_b d_2(\min\{\pi, F_{\mu_b}(y)\}, \pi) \right\},$$

which can also be shown to equal

$$\sup_{t \in \Sigma_K} \min_{b \neq 1} \inf_{y \in [x_\pi^+(\mu_1), x_\pi(\mu_b)]} \left\{ t_1 d_2(\max\{\pi, F_{\mu_1}^-(y)\}, \pi) + t_b d_2(\min\{\pi, F_{\mu_b}(y)\}, \pi) \right\}. \quad (51)$$

**Lemma H.2.** For fixed  $\eta$  and  $\pi$ ,  $\text{KL}_{\text{inf}}^L(\eta, y)$  and  $\text{KL}_{\text{inf}}^U(\eta, y)$  are lower-semicontinuous in  $y$ .

The proof of the above lemma follows from continuity of  $d_2(\cdot, \pi)$  and dual formulations for  $\text{KL}_{\text{inf}}^L$  and  $\text{KL}_{\text{inf}}^U$ . At the points of discontinuity of  $F_\eta$ ,  $\text{KL}_{\text{inf}}^L$  and  $\text{KL}_{\text{inf}}^U$  can only decrease in value, whence, lower-semicontinuous.

**Remark H.2.** Let  $\eta_n = 0.25\delta_0 + 0.25\delta_1 + 0.25\delta_2 + 0.25\delta_3$ ,  $\pi = 0.6$ ,  $y_n = 1 - \frac{1}{n}$ , and  $y = 1$ . With these,  $\eta = \eta_n$ , and  $y_n \rightarrow y$ . Using Lemma H.1,  $\text{KL}_{\text{inf}}^L(\eta_n, y_n) = d_2(0.25, 0.6)$ , while  $\text{KL}_{\text{inf}}^L(\eta, y) = d_2(0.5, 0.6)$ , thus showing that  $\text{KL}_{\text{inf}}^L$  is not jointly continuous. Similar example can be constructed for  $\text{KL}_{\text{inf}}^U$ .

**Lemma H.3.** Let  $\mathcal{X}$  and  $\mathcal{Y}$  be metric spaces with  $d_{\mathcal{X}}$  and  $d_{\mathcal{Y}}$  being the respective metrics. Let  $\tilde{f} : \mathcal{X} \times \mathcal{Y} \rightarrow \mathbb{R}$  be such that  $\forall \tilde{\epsilon} > 0$ ,  $\exists \tilde{\delta}$  such that  $\forall x \in \mathcal{X}$ , we have

$$\forall x' : d_{\mathcal{X}}(x, x') \leq \tilde{\delta} \implies \sup_{y \in \mathcal{Y}} \left| \tilde{f}(x, y) - \tilde{f}(x', y) \right| \leq \tilde{\epsilon}.$$

Furthermore, for a fixed  $x$ ,  $\tilde{f}(x, y)$  is lower-semicontinuous function of  $y$ . Then,  $\inf_{y \in \mathcal{C}(x)} \tilde{f}(x, y)$  is continuous in  $x$ , where  $\mathcal{C} : \mathcal{X} \rightarrow 2^{\mathcal{Y}}$  is a compact set-valued map.

*Proof.* Consider a sequence  $x_n$  such that  $d_{\mathcal{X}}(x_n, x_0) \rightarrow 0$  as  $n \rightarrow \infty$ . Let  $y_n$  be the minimizer for  $\tilde{f}(x_n, y)$ , i.e.,  $\inf_{y \in \mathcal{C}(x_n)} \tilde{f}(x_n, y) = \tilde{f}(x_n, y_n)$  and let  $y_0$  be that for  $\tilde{f}(x_0, y)$ . Existence of  $y_n$  and  $y_0$  is guaranteed by lower-semicontinuity of  $\tilde{f}(x, y)$  for fixed  $x$ , and compactness of the map  $\mathcal{C}$ . Then, for a fixed  $n$ ,

$$\tilde{f}(x_0, y_0) - \tilde{f}(x_n, y_n) \leq \tilde{f}(x_0, y_n) - \tilde{f}(x_n, y_n),$$

which, for  $n$  large enough so that  $d_{\mathcal{X}}(x_n, x_0) \leq \tilde{\delta}$ , is bounded by  $\tilde{\epsilon}$ . Similarly,

$$\tilde{f}(x_n, y_n) - \tilde{f}(x_0, y_0) \leq \tilde{f}(x_n, y_0) - \tilde{f}(x_0, y_0),$$

which is again bounded by  $\tilde{\epsilon}$  for large enough  $n$ , concluding the proof.  $\square$

For  $\mu \in \mathcal{M}$  and  $t \in \Sigma_K$ , define  $g_b(\mu, t, y) := t_1 \text{KL}_{\inf}^U(\mu_1, \pi) + t_b \text{KL}_{\inf}^L(\mu_b, \pi)$ , and let

$$h(\mu, t) = \min_{b \neq 1} \inf_{y \in [x_\pi^+(\mu_1), x_\pi(\mu_b)]} g_b(\mu, t, y).$$

From Lemma H.2, for fixed  $\mu, t$ ,  $g_b$  is lower-semicontinuous function of  $y$ . Furthermore,  $d_2(\cdot, \pi)$  being a continuous function on bounded support, is a uniformly continuous function. Whence, given  $\epsilon > 0$ , there exists  $\delta > 0$  such that

$$\forall(\tilde{\mu}, \tilde{t}) : \sum_a (d_K(\tilde{\mu}_a, \mu_a) + d(\tilde{t}_a, t_a)) \leq \delta \implies \sup_y |g_b(\mu, t, y) - g_b(\tilde{\mu}, \tilde{t}, y)| \leq \epsilon,$$

where  $d$  is a metric on  $\mathfrak{R}$ .

**Corollary H.3.1.**  $h(\mu, t)$  is a jointly continuous function.

As we did in Section 4 for CVaR, we will use the maximiser,  $t^*$ , evaluated at the empirical distribution vector to drive our sampling rule. Observe that, unlike CVaR, we do not need to project the empirical distribution in this setting. The algorithm stops at the first time,  $n$ , when

$$\max_a \min_{b \neq a} \inf_{x \in [x_\pi^+(\hat{\mu}_a(n)), x_\pi(\hat{\mu}_b(n))]} N_a(n) \text{KL}_{\inf}^U(\hat{\mu}_a(n), x) + N_b(n) \text{KL}_{\inf}^L(\hat{\mu}_b(n), x) \geq \beta(n, \delta),$$

where

$$\beta(t, \delta) = 6 \log \left( 1 + \log \frac{t}{2} \right) + \log \frac{K-1}{\delta} + 8 \log \left( 1 + \log \frac{K-1}{\delta} \right).$$

All in all, the algorithm for finding the best VaR arm is similar to that for CVaR, with the correct definition of  $\text{KL}_{\inf}^L$  and  $\text{KL}_{\inf}^U$  used at all places.

**Theorem H.4** (Formal statement of Theorem 4.5). *For  $\mu \in \tilde{\mathcal{M}}$ , the proposed algorithm for finding the best VaR-arm is  $\delta$ -correct, and satisfies*

$$\limsup_{\delta \rightarrow 0} \frac{\mathbb{E}(\tau_\delta)}{\log(1/\delta)} \leq \frac{1}{V(\mu)}. \quad (52)$$

For the proof of the Theorem H.4 above, we need to discuss two things: upper-hemicontinuity of  $t^*$ , which is needed for the proof of (52) and deviation inequalities for the stopping statistic, which is needed for the  $\delta$ -correctness.

To prove  $\delta$ -correctness of the algorithm, we would like to show that

$$\mathbb{P} \left( \exists n \in \mathbb{N} : \max_{a \neq 1} \min_{b \neq a} \{ N_a(n) \text{KL}_{\inf}^U(\hat{\mu}_a, x_\pi(\mu_a)) + N_b(n) \text{KL}_{\inf}^L(\hat{\mu}_1, x_\pi(\mu_1)) \} \geq \beta(n, \delta) \right)$$

is at most  $\delta$ . Towards this, it is sufficient to show that the following event has probability at most  $\delta$ :

$$\left\{ \exists n \in \mathbb{N} : \max_{a \neq 1} \{ N_a(n) d_2(F_{\hat{\mu}_a(n)}, \pi) + N_1(n) d_2(F_{\hat{\mu}_1(n)}, \pi) \} \geq \beta(n, \delta) \right\}.$$

The above deviation inequality follows from the observation (see e.g. [32]) that for each arm  $a$ ,  $F_{\hat{\mu}_a(t)}(x_\pi(\mu_a))$  is an average of i.i.d. Bernoulli random variables with bias  $\pi$ . This means that we can employ standard uniform deviation inequalities for sums of self-normalised variables (see, [38, Section 6.1]).

Recall that the sample complexity proof for the best CVaR-arm problem required continuity (upper-hemicontinuity) of  $t^*$  only in the Kolmogorov metric which, for measures  $\eta_1$  and  $\eta_2$  is defined as

$$d_K(\eta_1, \eta_2) = \sup_{x \in \mathfrak{R}} |F_{\eta_1}(x) - F_{\eta_2}(x)|.$$

Upper-hemicontinuity of  $t^*(\mu)$  (in the Kolmogorov metric, as a function of  $\mu$ ) follows from Corollary H.3.1 together with Berge's Maximum theorem. Furthermore, the set of maximizers,  $t^*$ , is convex.

In conclusion, we see that asymptotically optimal algorithms for the minimum VaR arm identification problem lie squarely in the convex hull of existing ideas.

One challenge with the VaR objective is that the objective inside the  $\inf_{x_0}$  in the expression for  $V(\mu)$  is not (quasi) convex. Our current best computational approach is to do a one-dimensional grid search over candidates  $x_0$ . Once we have the oracle for computing the inner optimization problem for a given  $t \in \Sigma_K$ , we can compute the inner  $\inf_{x_0}$  problem for the best-looking arm vs all alternatives. We may then further wrap this oracle in an outer optimisation (for example by the Ellipsoid method) to find  $t^*$ .

## I Discussion on the mean-CVaR problem

Recall that we have  $K$  arms, each associated with a distribution, which may, for example, correspond to a loss in a financial investment. When an arm is selected, an independent sample from the associated distribution is revealed. In the mean-CVaR problem, the performance-metric associated with a distribution  $\eta$  is  $o(\eta) := \alpha_1 m(\eta) + \alpha_2 c_\pi(\eta)$ , where  $\alpha_1 > 0$ ,  $\alpha_2 > 0$ ,  $m(\eta)$  and  $c_\pi(\eta)$  denote the mean and CVaR at  $\pi^{th}$ -quantile for distribution  $\eta$ . We are interested in finding the arm with minimum value of this metric in a  $\delta$ -correct BAI framework. We point out that this problem is conceptually and technically similar to the CVaR-BAI problem, described in detail in the main text. Hence, we state the results directly, while omitting the proofs.

In this section, we again need to restrict arm-distributions to class  $\mathcal{L} = \{\eta \in \mathcal{P}(\mathbb{R}) : \mathbb{E}_\eta(|X|^{1+\epsilon}) \leq B\}$ , otherwise the problem is un-learnable. This imposes restrictions on possible values of  $o(\eta)$ ,  $c_\pi(\eta)$ , and  $x_\pi(\eta)$ , which are stated next.

**Lemma I.1.** For  $\alpha_1 > 0$ ,  $\alpha_2 > 0$ ,  $\pi \in (0, 1)$

$$\min_{\eta \in \mathcal{L}} \alpha_1 m(\eta) + \alpha_2 c_\pi(\eta) + \alpha_2 x_\pi(\eta) \frac{\pi}{1-\pi} = -B^{\frac{1}{1+\epsilon}} \left( \alpha_1 + \frac{\alpha_2}{1-\pi} \right).$$

*Proof.* First, observe that it suffices to consider distributions supported on only 2-points. Then the following is an equivalent problem:

$$\min_{x \leq y} \alpha_1 x \pi + (1-\pi) \alpha_1 y + \alpha_2 y + \alpha_2 x \frac{\pi}{1-\pi} \quad \text{s.t.} \quad \pi |x|^{1+\epsilon} + (1-\pi) |y|^{1+\epsilon} \leq B.$$

The objective function can be re-written as  $\left( \alpha_1 + \frac{\alpha_2}{1-\pi} \right) (x\pi + (1-\pi)y)$ , which clearly is minimized at  $x = y = -B^{\frac{1}{1+\epsilon}}$ , proving the desired equality.  $\square$

**Lemma I.2.** For  $\alpha_1 > 0$ ,  $\alpha_2 > 0$ ,  $\pi \in (0, 1)$

$$\max_{\eta \in \mathcal{L}} \alpha_1 m(\eta) + \alpha_2 c_\pi(\eta) = B^{\frac{1}{1+\epsilon}} \alpha_1 \left( \pi + (1-\pi) \left( 1 + \frac{\alpha_2}{\alpha_1(1-\pi)} \right)^{1+\frac{1}{\epsilon}} \right)^{\frac{\epsilon}{1+\epsilon}}.$$

*Proof.* First, observe that it is sufficient to consider distributions supported only on 2 points. Thus, the problem is equivalent to

$$\max_{x \leq y} \alpha_1 \pi x + \alpha_1 (1-\pi) y + \alpha_2 y \quad \text{s.t.} \quad \pi |x|^{1+\epsilon} + (1-\pi) |y|^{1+\epsilon} \leq B.$$

The objective function above can be re-written as  $\alpha_1 \pi x + (1-\pi) y \left( \frac{\alpha_2}{1-\pi} + \alpha_1 \right)$ . Since we are optimizing a linear function over a convex set, the optimal will occur at a boundary. In particular, the moment-constraint will hold as equality, and

$$x^* = \left( \frac{B - (1-\pi)y^{1+\epsilon}}{\pi} \right)^{\frac{1}{1+\epsilon}}$$

will be satisfied. At this point, the problem reduces to

$$\max_{\left( \frac{B}{1-\pi} \right)^{\frac{1}{1+\epsilon}} \geq y \geq 0} \alpha_1 \pi^{\frac{\epsilon}{1+\epsilon}} \left( B - (1-\pi)y^{1+\epsilon} \right) + (1-\pi)y \left( \frac{\alpha_2}{1-\pi} + \alpha_1 \right).$$

Differentiating with respect to  $y$ , and setting derivative to 0, we get

$$y^* = \left(1 + \frac{\alpha_2}{\alpha_1(1-\pi)}\right)^{\frac{1}{\epsilon}} \left(\frac{B}{\theta + (1-\theta) \left(1 + \frac{\alpha_1}{\alpha_1(1-\theta)}\right)^{1+\frac{1}{\epsilon}}}\right)^{\frac{1}{1+\epsilon}}.$$

Furthermore, it can be verified that  $y^* < \left(\frac{B}{1-\pi}\right)$ . Hence, substituting this into the objective function gives the desired result.  $\square$

**Lemma I.3.** For  $\alpha_1 > 0, \alpha_2 > 0, \pi \in (0, 1)$

$$\min_{\eta \in \mathcal{L}} \alpha_1 m(\eta) + \alpha_2 c_\pi(\eta) = -B^{\frac{1}{1+\epsilon}} (\alpha_1 + \alpha_2).$$

*Proof.* First, observe that it is sufficient to consider distributions supported only on 2 points. Thus, the problem is equivalent to

$$\max_{x \leq y} \alpha_1 \pi x + \alpha_1 (1-\pi)y + \alpha_2 y \quad \text{s.t.} \quad \pi |x|^{1+\epsilon} + (1-\pi) |y|^{1+\epsilon} \leq B.$$

The objective function above can be re-written as  $\alpha_1 \pi x + (1-\pi)y \left(\frac{\alpha_2}{1-\pi} + \alpha_1\right)$ . Since we are optimizing a linear function over a convex set, the optimal will occur at a boundary. In particular, the moment-constraint will hold as equality, and

$$x^* = -\left(\frac{B - (1-\pi)y^{1+\epsilon}}{\pi}\right)^{\frac{1}{1+\epsilon}}$$

will be satisfied. At this point, the problem reduces to

$$\max_{-B^{\frac{1}{1+\epsilon}} \leq y \leq 0} -\alpha_1 \pi^{\frac{\epsilon}{1+\epsilon}} (B - (1-\pi)(-y)^{1+\epsilon}) + (1-\pi)y \left(\frac{\alpha_2}{1-\pi} + \alpha_1\right).$$

Differentiating with respect to  $y$ , and setting derivative to 0, we get

$$y^* = -\left(1 + \frac{\alpha_2}{\alpha_1(1-\pi)}\right)^{\frac{1}{\epsilon}} \left(\frac{B}{\theta + (1-\theta) \left(1 + \frac{\alpha_1}{\alpha_1(1-\theta)}\right)^{1+\frac{1}{\epsilon}}}\right)^{\frac{1}{1+\epsilon}}.$$

Observe that  $y^* < -B^{\frac{1}{1+\epsilon}}$ . Substituting  $y^* = 0$  in the objective function, we get the desired bound.  $\square$

**Lemma I.4.** For  $\alpha_1 > 0, \alpha_2 > 0, \pi \in (0, 1)$

$$\min_{\eta \in \mathcal{L}} \alpha_1 m(\eta) + \alpha_2 c_\pi(\eta) - \alpha_2 x_\pi(\eta) = -\alpha_1 B^{\frac{1}{1+\epsilon}}.$$

*Proof.* First, observe that the given problem can be re-written as

$$\min_{\eta \in \mathcal{L}} \alpha_1 m(\eta) + \alpha_2 \mathbb{E}_\eta ((X - x_\pi(\eta))_+).$$

Since the second term above is non-negative, and the first term is minimized by  $\eta^*$  which is a point mass at  $-B^{\frac{1}{1+\epsilon}}$ , with second term being 0,  $\eta^*$  is optimal, proving the desired equality.  $\square$

As earlier, for  $\eta \in \mathcal{P}(\mathfrak{R})$  and  $x \in \mathfrak{R}$ , the following two quantities will be crucial for the algorithm and its analysis:

$$\text{KL}_{\inf}^{\text{U}}(\eta, x) = \min_{\substack{\kappa \in \mathcal{L} \\ o(\kappa) \geq x}} \text{KL}(\eta, \kappa) \quad \text{and} \quad \text{KL}_{\inf}^{\text{L}}(\eta, x) = \min_{\substack{\kappa \in \mathcal{L} \\ o(\kappa) \leq x}} \text{KL}(\eta, \kappa).$$

### I.1 Mean-CVaR: algorithm and results

For  $x \in \mathfrak{R}$ ,  $z \in \mathfrak{R}$ , and  $\eta \in \mathcal{P}(\mathfrak{R})$ , let  $\mathcal{S}_2(z, x)$  equal

$$\left\{ \lambda_1 \geq 0, \lambda_2 \geq 0 : \min_{y \in \mathfrak{R}} 1 - \lambda_1(B - |y|^{1+\epsilon}) - \lambda_2 \left( x - \alpha_1 y - \alpha_2 z - \frac{\alpha_2}{1-\pi} (y - z)_+ \right) \geq 0 \right\},$$

$$\mathcal{Z}(x) := \left[ - \left( \frac{B}{\pi} \right)^{\frac{1}{1+\epsilon}}, \frac{x + \alpha_1 B^{\frac{1}{1+\epsilon}}}{\alpha_2} \right],$$

$$\mathcal{O} = \left[ -B^{\frac{1}{1+\epsilon}} (\alpha_1 + \alpha_2), B^{\frac{1}{1+\epsilon}} \alpha_1 \left( \pi + (1-\pi) \left( 1 + \frac{\alpha_2}{\alpha_1(1-\pi)} \right)^{1+\frac{1}{\epsilon}} \right)^{\frac{\epsilon}{1+\epsilon}} \right],$$

and let  $\mathcal{S}_5$  be set of all  $(\rho_1, \rho_2, \rho_4)$  such that  $\rho_1 \geq 0, \rho_2 \geq 0, \rho_4 \in \mathfrak{R}$ , and

$$\min_{y \in \mathfrak{R}} 1 - \rho_1(B - |y|^{1+\epsilon}) + \rho_2(x - \alpha_1 y) - \rho_4(1 - \pi) - \left( \frac{\rho_2 \alpha_2 y}{1 - \pi} - \rho_4 \right)_+ \geq 0.$$

For  $\eta \in \mathcal{P}(\mathfrak{R})$  and  $x \in \mathcal{O}$ ,  $\text{KL}_{\inf}^L(\eta, x)$  equals

$$\min_{z \in \mathcal{Z}(x)} \max_{(\lambda_1, \lambda_2) \in \mathcal{S}_2} \mathbb{E}_\eta \left( \log \left( 1 - \lambda_1(B - |X|^{1+\epsilon}) - \lambda_2 \left( x - \alpha_1 X - \alpha_2 z - \frac{\alpha_2}{1-\pi} (X - z)_+ \right) \right) \right),$$

and  $\text{KL}_{\inf}^U(\eta, x)$  equals

$$\max_{\rho \in \mathcal{S}_5} \mathbb{E}_\eta \left( \log \left( 1 - \rho_1(B - |X|^{1+\epsilon}) + \rho_2(x - \alpha_1 X) - \rho_4(1 - \pi) - \left( \frac{\rho_2 \alpha_2 X}{1 - \pi} - \rho_4 \right)_+ \right) \right).$$

As earlier, these are precisely the dual representations for the KL-projection functionals, crucial for the algorithm, and its analysis. Compactness of the dual regions,  $\mathcal{S}_2$  and  $\mathcal{S}_5$ , can be argued as in Section D.3. Joint-continuity of these KL-projection functionals can also be established by mimicking the arguments in Section C.2, which is required for the sample complexity proof. Concentration inequalities similar to those in Proposition 4.2 can be developed for the empirical versions of these mean-CVaR KL-projection functionals, and the algorithm of Section 4, with  $\text{KL}_{\inf}^U$  and  $\text{KL}_{\inf}^L$  as defined in this section, and  $\beta$  as in (7), gives a plug-n-play algorithm for the mean-CVaR BAI problem.

**Theorem I.5** (Formal statement of Theorem 4.3). *For  $\mu \in \mathcal{M}^o$ , the proposed algorithm for finding the best mean-CVaR-arm is  $\delta$ -correct, and satisfies*

$$\limsup_{\delta \rightarrow 0} \frac{\mathbb{E}(\tau_\delta)}{\log(1/\delta)} \leq \frac{1}{V(\mu)}.$$

### J Discussion of $\text{KL}_{\inf}$ -based confidence intervals for CVaR

In this section we construct  $\text{KL}_{\inf}$ -based confidence intervals for CVaR, and compare them to those obtained from the traditional concentration and clipping arguments. We will show how the traditional argument can be recovered from the  $\text{KL}_{\inf}$  concentration at minor overhead, but with built-in anytime validity.

Given  $n$  samples from a distribution  $\eta \in \mathcal{L}$ ,  $U_n$  defined below is an upper bound on the true CVaR of  $\eta$  at its  $\pi^{th}$  quantile, where

$$U_n = \max \{ x \in \mathfrak{R} : n \text{KL}_{\inf}^U(\hat{\eta}_n, x) \leq C \}, \quad (53)$$

for an appropriately chosen threshold  $C$ , so that  $U_n \geq c_\pi(\eta)$  with probability at least  $1 - \delta$ . This follows from Proposition 4.2.

This upper bound can be re-formulated as

$$U_n = \max \{c_\pi(\kappa) : \kappa \in \mathcal{L}, n \text{KL}(\hat{\eta}_n, \kappa) \leq C\}.$$

Using the Donsker-Varadhan variational representation for the KL divergence,  $U_n$  is at most

$$\max_{\kappa \in \mathcal{L}} c_\pi(\kappa) \quad \text{s.t.} \quad n\mathbb{E}_{\hat{\eta}(n)}(g(X)) - n \log \mathbb{E}_\kappa(e^{g(X)}) \leq C,$$

for all measurable functions,  $g$ , with a finite second term above. Let  $x_\pi$  denote the  $\pi^{th}$ -quantile for  $\kappa$ . Then, for a sequence of thresholds  $u_n$ , and  $\theta > 0$ , we define the function

$$g_n(X) = -\frac{\theta}{1-\pi} X \mathbb{1}(x_\pi \leq X \leq u_n).$$

Substituting  $g_n$  for  $g$  in the above, and adding  $\frac{n\theta}{1-\pi} \mathbb{E}_\kappa(X \mathbb{1}(x_\pi \leq X))$  on both the sides, we get that  $U_n$  is at most the maximum  $c_\pi(\kappa)$  such that  $\kappa \in \mathcal{L}$  and

$$\begin{aligned} & \frac{\theta}{1-\pi} \sum_{i=1}^n (\mathbb{E}_\kappa(X \mathbb{1}(x_\pi \leq X)) - X_i \mathbb{1}(x_\pi \leq X_i \leq u_n)) \\ & - n \log \mathbb{E}_\kappa \left( e^{-\frac{\theta}{1-\pi} X \mathbb{1}(x_\pi \leq X \leq u_n)} \right) \leq C + \frac{n\theta}{1-\pi} \mathbb{E}_\kappa(X \mathbb{1}(x_\pi \leq X)). \end{aligned} \quad (54)$$

Let  $Y_n = X \mathbb{1}(x_\pi \leq X \leq u_n)$ ,  $m_n = \mathbb{E}_\kappa(X \mathbb{1}(x_\pi \leq X \leq u_n))$ , and  $\theta_\pi = \frac{\theta}{1-\pi}$ . Then  $|Y_n| \leq u_n$  and  $\mathbb{E}_\kappa(\theta_\pi^2 Y_n^2) \leq \theta_\pi^2 B u_n^{1-\epsilon}$ . Using this,

$$\mathbb{E}_\kappa \left( e^{-\theta_\pi X \mathbb{1}(x_\pi \leq X \leq u_n)} \right) \leq 1 - \theta_\pi m_n + \sum_{j=2}^{\infty} \frac{\mathbb{E}_\kappa(|\theta_\pi Y_n|^j)}{j!} \leq 1 - \theta_\pi m_n + \frac{B}{u_n^{1+\epsilon}} \sum_{j=2}^{\infty} \frac{(\theta_\pi u_n)^j}{j!}. \quad (55)$$

Thus, we have  $\mathbb{E}_\kappa(e^{-\theta_\pi X \mathbb{1}(x_\pi \leq X \leq u_n)}) \leq 1 - \theta_\pi m_n + \frac{B}{u_n^{1+\epsilon}}(e^{\theta_\pi u_n} - \theta_\pi u_n - 1)$ . Using  $1 + x \leq e^x$  and (55) in (54), we get that  $U_n$  is at most:  $\max_{\kappa \in \mathcal{L}} c_\pi(\kappa)$  subject to

$$\begin{aligned} & \theta_\pi \sum_{i=1}^n (\mathbb{E}_\kappa(X \mathbb{1}(x_\pi \leq X)) - X_i \mathbb{1}(x_\pi \leq X_i \leq u_n)) \\ & \leq C + n \left( \theta_\pi \mathbb{E}_\kappa(X \mathbb{1}(x_\pi \leq X)) - \theta_\pi m_n + \frac{B}{u_n^{1+\epsilon}}(e^{\theta_\pi u_n} - \theta_\pi u_n - 1) \right). \end{aligned}$$

Clearly,  $\mathbb{E}_\kappa(X \mathbb{1}(X \geq u_n))$  is at most  $B/(u_n)^\epsilon$ . The above constraint can be relaxed to

$$\begin{aligned} & \frac{1}{n} \sum_{i=1}^n (\mathbb{E}_\kappa(X \mathbb{1}(x_\pi \leq X)) - X_i \mathbb{1}(x_\pi \leq X_i \leq u_n)) \\ & \leq \frac{B}{u_n^\epsilon} + \frac{1}{\theta_\pi} \left( \frac{C}{n} + \frac{B}{u_n^{1+\epsilon}}(e^{\theta_\pi u_n} - \theta_\pi u_n - 1) \right). \end{aligned}$$

Choosing  $\theta_\pi = \frac{C u_n^\epsilon}{nB}$ , the above constraint is

$$\frac{1}{n} \sum_{i=1}^n (\mathbb{E}_\kappa(X \mathbb{1}(x_\pi \leq X)) - X_i \mathbb{1}(x_\pi \leq X_i \leq u_n)) \leq \frac{B}{u_n^\epsilon} + \frac{nB^2}{C u_n^{1+2\epsilon}} \left( e^{\frac{C u_n^{1+\epsilon}}{Bn}} - 1 \right).$$

Recall that

$$c_\pi(\kappa) = \frac{1}{1-\pi} \mathbb{E}_\kappa(X \mathbb{1}(x_\pi \leq X)).$$

Setting

$$u_n = \left( Bn (\log \delta_0^{-1})^{-1} \right)^{\frac{1}{1+\epsilon}} \quad \text{and} \quad \hat{c}_{\pi,n}(\delta_0) := \frac{1}{n(1-\pi)} \sum_{i=1}^n X_i \mathbb{1}(x_\pi \leq X_i \leq u_n),$$

for some parameter  $\delta_0$  which will be chosen later, we get the following upper bound on  $U_n$ :

$$\hat{c}_{\pi,n}(\delta_0) + \frac{B^{\frac{1}{1+\epsilon}}}{1-\pi} \left( \frac{\log \delta_0^{-1}}{n} \right)^{\frac{\epsilon}{1+\epsilon}} \left( 1 + \left( e^{\frac{C}{\log \delta_0^{-1}}} - 1 \right) \frac{\log \delta_0^{-1}}{C} \right). \quad (56)$$

Observe that  $\hat{c}_{\pi,n}(\delta)$  is the popular truncation-based estimator. Now, if  $\delta_0 = \delta$  and  $C \approx \log \delta^{-1}$ , then we obtain

$$U_n \leq \hat{c}_{\pi,n}(\delta) + \frac{4B^{\frac{1}{1+\epsilon}}}{1-\pi} \left( \frac{\log \delta^{-1}}{n} \right)^{\frac{\epsilon}{1+\epsilon}}, \quad (57)$$

which is a  $(1-\delta)$ -probability upper bound for the true CVaR, obtained using the truncated estimator,  $\hat{c}_{\pi,n}(\delta)$  [39, see, (29)], assuming perfect estimation of VaR at the  $\pi^{th}$  quantile. From Proposition 4.2, however, the current best  $C$  permitted is  $\log \delta^{-1}$  with an additional  $3 \log(\text{number of samples})$ , which gives that our upper-bound will be worse. However, our confidence intervals are any-time (as Proposition 4.2 is).

Typically, in applications to multi-armed bandit problems, we require high-probability upper bounds for a *random* number of samples allocated to an arm. Our confidence intervals are any-time and can be directly used in these applications. The same is not true for the truncation-based intervals, where a union bound would instead be needed in the analysis.

For example, in the classical regret-minimization framework of MAB with CVaR as the (unobserved) loss, a UCB algorithm based on the truncation-based estimator in (57) would choose  $\delta = T^{-2}$  at time  $T$ , for constructing index for an arm with  $n$  samples. With this choice of  $\delta$ , r.h.s. of (57) would correspond to index for such an arm at time  $T$ . On the other hand, since the bound for  $\text{KL}_{\text{inf}}^U$  is anytime, UCB constructed using it would require  $\delta \approx (T \log^2(T))^{-1}$ . This would correspond to setting  $C \approx \log T + 2 \log \log T + 3 \log(\text{number of samples})$  in (53).

[3] recently show that a UCB algorithm using an arm index similar to (53) ( $\text{KL}_{\text{inf}}$ -UCB) is asymptotically optimal for the mean objective in heavy-tailed bandits. Their algorithm, with  $\text{KL}_{\text{inf}}$  replaced with  $\text{KL}_{\text{inf}}^U$  or  $\text{KL}_{\text{inf}}^L$  as appropriate, will be an optimal algorithm for regret-minimization with the CVaR-objective. Since for such an algorithm, sub-optimal arms are pulled approximately  $\log T$  times till time  $T$ , this would correspond to setting

$$C \approx \log T + 2 \log \log T + 3 \log \log T$$

for sub-optimal arms in this application. With this choice of  $C$ , (56) is an upper bound on our index at time  $T$ , for all values of  $\delta_0$ . In particular, setting  $\delta_0 = T^{-2}$ , we get that our index for a sub-optimal arm is dominated by

$$\hat{c}_{\pi,n}(T^{-2}) + \frac{3B^{\frac{1}{1+\epsilon}}}{1-\pi} \left( \frac{2 \log T}{n} \right)^{\frac{\epsilon}{1+\epsilon}},$$

which is smaller than the index of UCB with the truncated estimator.

Furthermore, the comparison with (56) doesn't account for error in estimating the VaR of the underlying distribution, which is also needed in the truncation-based CVaR estimator. We would also like to point out that the estimator of [39] is similar to the  $\hat{c}_{\pi,n}(\delta)$  defined above, with the truncation level changing for each sample. However, using their analysis, it can be shown that both  $\hat{c}_{\pi,n}(\delta)$  have the same guarantees.

## K Batched algorithm and Sample complexity

In this section, look at the computational complexity of our asymptotically-optimal algorithm for the CVaR or mean-CVaR BAI, and propose a modification which is optimal up to constants, but is computationally less expensive.

We observe numerically that the computational cost of the KL-projection functionals increases linearly in the number of samples of the empirical distribution. In particular, the computation of

optimal weights increases linearly with number of samples. Let this cost at time  $n$  be  $c_1 + c_2 n$ , where  $c_1$  and  $c_2$  are non-negative constants. Then, the over-all cost of the algorithm till time  $\tau_\delta$  is  $(c_1 + \frac{c_2}{2})\tau_\delta + \frac{c_2}{2}\tau_\delta^2$ , which is quadratic in the total number of samples.

Consider a modification in which we only check for stopping condition, and compute the weights at  $(1 + \eta)$ -geometrically spaced times, for  $\eta > 0$ , and use these weights to allocate the samples at all the intermediate times using any reasonable tracking rule. The  $(1 + \eta)$ -batched algorithm with the randomized tracking rule of [2] is formally described in the next subsection. The algorithm makes an error if at the stopping time, its estimate for the best-arm is incorrect. As earlier, the error probability can be seen to be at most  $3\delta$ , and  $\delta$ -correctness thus follows (Section K.2).

**Theorem K.1.** *The  $\eta$ -batched algorithm with randomized tracking is  $\delta$ -correct, and satisfies:*

$$\limsup_{\delta \rightarrow 0} \frac{\mathbb{E}(\tau_\delta)}{\log(1/\delta)} \leq \frac{1 + \eta}{V(\mu)}.$$

The proof of the Theorem K.1 is similar to that of sample complexity part of Theorem 4.1 and can be found in Appendix K.3 below. Thus, if  $\tau_\delta$  denotes the stopping time of the original algorithm, the batched algorithm stops after at most  $(1 + \eta)\tau_\delta$ . Moreover, it computes optimal weights roughly at times  $(1 + \eta)^i$ , for  $i \in \left\{0, 1, \dots, \frac{\log \tau_\delta}{1 + \eta} + 1\right\}$ . Thus, the computational cost of this algorithm is at most  $\left(\frac{\log \tau_\delta}{\log(1 + \eta)} + 1\right) c_1 + (1 + \eta)^2 \tau_\delta \frac{c_2}{\eta}$ , which is roughly linear in  $\tau_\delta$ , the number of samples generated.

## K.1 Algorithm

The algorithm proceeds in batches, as below. Let  $t_l$  denote the time of beginning of  $l^{th}$  batch, and let  $b_l$  denote its size. We use the randomized sampling rule, as in [2]. The stopping and recommendation rules are as earlier (see Section 4).

- Pull each arm  $K$  times. Initialize  $l = 1$ ,  $t_l = K^2 + 1$  and  $b_l = \max\{1, \lceil \tilde{\eta}(t_l - K^2) \rceil\}$ .
- At the beginning of each batch,  $l$ , compute the optimal weights  $t^*(\Pi(\hat{\mu}(t_l)))$ , where  $\Pi$  is the map that projects the argument on to  $\mathcal{L}^K$  in the Kolmogorov metric (see Section 4 for details of the projection map). Check if the stopping condition is met. If not,
  1. Compute starvation of each arm  $a$ , defined as  $s_a = \max\{0, (t_l + b_l)^{1/2} - N_a(t_l)\}$ .
  2. If  $\sum_a s_a \leq b_l$ , generate  $s_a$  many samples from arm  $a$ , for all arms. Furthermore, generate  $b_l - \sum_a s_a$  i.i.d. samples from the weight distribution,  $t^*(\Pi(\hat{\mu}(t_l)))$ . For each arm  $a$ , count the number of times  $a$  appears in the generated samples and sample arm  $a$  that many times.
  3. Else if  $b_l < \sum_a s_a$ , then generate  $\hat{s}_a$  samples from arm  $a$ , where  $\hat{s} = \{\hat{s}_1, \dots, \hat{s}_K\}$  is the solution to the following load balancing problem:  $\min_{\hat{s}} \max_a \{s_a - \hat{s}_a\}$  such that  $\hat{s}_a \in \mathbb{N}$ ,  $\hat{s}_a \in [0, s_a]$ , and  $\sum_a \hat{s}_a = b_l$ .
  4. Set  $t_{l+1} = t_l + b_l$ ,  $b_{l+1} = \max\{1, \lceil \tilde{\eta}(t_{l+1} - K^2) \rceil\}$ , and  $l = l + 1$ , and repeat.
- If the stopping condition is met, declare the empirically-best CVaR-arm as the answer.

Clearly,  $K^2 + \frac{(1 + \tilde{\eta})^l - 1}{\tilde{\eta}} \geq t_l \geq K^2 + (1 + \tilde{\eta})^{l-1}$  and  $(1 + \tilde{\eta})^l \geq b_l \geq \tilde{\eta}(1 + \tilde{\eta})^{l-1}$ , and are deterministic. Moreover, for  $t > 0$ , let  $l(t)$  denote the batch  $l$  such that  $t_l \leq t \leq t_{l+1}$ .

**Lemma K.2.** *The  $\tilde{\eta}$ -batched algorithm ensures that for all  $l \geq 1$ ,  $N_a(t_l) \geq \frac{t_l^{\frac{1}{2}}}{K} - 1$ .*

*Proof.* Clearly, for  $l = 1$ ,  $t_1 = K^2 + 1$ , and each arm has  $K \geq \frac{t_1^{\frac{1}{2}}}{K} - 1$  samples. Let the given statement be true for all  $l \leq l_0$ , for some  $l_0 \in \mathbb{N}$ . Then, for  $l = l_0 + 1$  the statement will be true if  $(t_{l_0+1}^{\frac{1}{2}} - t_{l_0}^{\frac{1}{2}}) \leq \lceil \tilde{\eta}(t_{l_0} - K^2) \rceil$ , where r.h.s. is the number of samples available with the algorithm in the batch  $l_0 + 1$ , and l.h.s. is the maximum number of samples the algorithm will need to allocate in order to ensure the inequality in the lemma. The above is equivalent to showing that  $(t_{l_0} + \lceil \tilde{\eta}(t_{l_0} - K^2) \rceil)^{\frac{1}{2}} - t_{l_0}^{\frac{1}{2}} < \lceil \tilde{\eta}t_{l_0} - \tilde{\eta}K^2 \rceil$ . For positive  $a$  and  $b$ ,  $a^{\frac{1}{2}} + b^{\frac{1}{2}} \geq (a + b)^{\frac{1}{2}}$ .

Hence,  $(t_{l_0} + \lceil \tilde{\eta}(t_{l_0} - K^2) \rceil)^{\frac{1}{2}} - t_{l_0}^{\frac{1}{2}} \leq \lceil \tilde{\eta}t_{l_0} - \tilde{\eta}K^2 \rceil^{\frac{1}{2}} \leq \lceil \tilde{\eta}t_{l_0} - \tilde{\eta}K^2 \rceil$ , proving the desired inequality.  $\square$

## K.2 $\delta$ -correctness

As in Section 4, our stopping rule corresponds to thresholding the  $Z$  statistic (see (7)). However, instead of checking this at each time, we do this only at the beginning of each batch. Formally, the stopping time,  $\tau_\delta$ , lies in  $\{t_l : l \in \mathbb{N}\}$ , where  $t_l$  corresponds to time of beginning of  $l^{th}$  batch. As earlier, error occurs when at time  $\tau_\delta$ , the estimated best-arm is not arm 1. Thus, the error event is contained in

$$\left\{ \exists n : \bigcup_{i \neq 1} \left\{ \inf_{x \leq y} \{ N_i(n) \text{KL}_{\inf}^U(\hat{\mu}_i(n), y) + N_1(n) \text{KL}_{\inf}^L(\hat{\mu}_1(n), x) \} \geq \beta; \mathcal{E}_n(i) \right\} \right\},$$

which can be bounded using Proposition 4.2, as in Section 4. We omit the details here, and refer the reader to Section 4.

## K.3 Sample complexity

We now prove that the sample complexity of the batched-algorithm matches the lower bound upto a factor of  $1 + \tilde{\eta}$ , asymptotically as  $\delta \rightarrow 0$ , i.e., it satisfies

$$\limsup_{\delta \rightarrow 0} \frac{\mathbb{E}_\mu(\tau_\delta)}{\log \frac{1}{\delta}} \leq \frac{1 + \tilde{\eta}}{V(\mu)}.$$

As in Section F.2, we use the projections in the Kolmogorov metric, i.e.,  $\Pi = (\Pi_1, \Pi_2, \dots, \Pi_K)$ , where

$$\Pi_i(\eta) \in \operatorname{argmin}_{\kappa \in \mathcal{L}} d_K(\kappa, \eta), \quad \text{and} \quad d_K(\kappa, \eta) = \sup_{x \in \mathcal{R}} |F_\kappa(x) - F_\eta(x)|,$$

and  $F_\kappa$  and  $F_\eta$  denote the CDF functions for the measures  $\eta$  and  $\kappa$ . As earlier (Section F.2), define  $\mathcal{I}_{\epsilon'} \triangleq B_\zeta(\mu_1) \times B_\zeta(\mu_2) \times \dots \times B_\zeta(\mu_K)$ , where  $B_\zeta(\mu_i) = \{\kappa \in \mathcal{P}(\mathcal{R}) : d_K(\kappa, \mu_i) \leq \zeta\}$ , and  $\zeta > 0$  is chosen to satisfy the following:

$$\mu' \in \mathcal{I}_{\epsilon'} \implies \forall t' \in t^*(\Pi(\mu')), \exists t \in t^*(\mu) \text{ s.t. } \|t' - t\|_\infty \leq \epsilon'.$$

Recall that  $\mu \in \mathcal{M}$  is such that  $-f^{-1}(B) < c_\pi(\mu_1) < \max_{j \neq 1} c_\pi(\mu_j) < f^{-1}\left(\frac{B}{1-\pi}\right)$ , where  $f^{-1}(c) := \max\{y : f(y) = c\}$ . For  $T \in \mathbb{N}$ , define  $l_0(T) = l(T^{\frac{1}{4}})$ ,  $l_1(T) = l(T^{\frac{3}{4}}) + 1$ ,  $l_2(T) = \max\{l_1(T), l(T) - 1\}$ , where for  $n \in \mathbb{N}$ ,  $l(n)$  denotes  $l$  such that  $t_l \leq t \leq t_{l+1}$  and  $t_l$  denotes time of beginning of  $l^{th}$  batch. Furthermore, let

$$\mathcal{G}_T(\epsilon') = \bigcap_{l=l_0(T)}^{l_2(T)} \{\hat{\mu}(t_l) \in \mathcal{I}_{\epsilon'}\} \bigcap_{l=l_1(T)}^{l_2(T)} \left\{ \max_{a \in [K]} \left| \frac{N_a(t_l)}{t_l} - t_a^*(\mu) \right| \leq 4\epsilon' \right\}.$$

Let  $\mu'$  be a vector of  $K$ , 1-dimensional distributions from  $\mathcal{P}(\mathcal{R})$ ,  $[K] = \{1, \dots, K\}$ , and let  $t' \in \Sigma_K$ . Define

$$g(\mu', t') \triangleq \max_{a \in [K]} \min_{b \neq a} \inf_{x \in [-f^{-1}(B), f^{-1}(\frac{B}{1-\pi})]} (t'_a \text{KL}_{\inf}^U(\mu'_1, x) + t'_b \text{KL}_{\inf}^L(\mu'_b, x)).$$

Note that, for  $\mu \in (\mathcal{P}(\mathcal{R}))^K$ , from Lemma C.3 and Berge's Theorem (see, [8, Theorem 2, Page 116]),  $g(\mu, t)$  is a jointly lower-semicontinuous function of  $(\mu, t)$ . Let  $\|\cdot\|_\infty$  be the maximum norm in  $\mathcal{R}^K$ , and

$$C_{\epsilon'}^*(\mu) \triangleq \inf_{\substack{\mu' \in \mathcal{I}_{\epsilon'} \\ t' : \inf_{t \in t^*(\mu)} \|t' - t\|_\infty \leq 4\epsilon'}} g(\mu', t').$$

Recall that for  $n \in \mathbb{N}$ , the modified log generalized likelihood ratio statistic for  $\hat{\mu}(n)$ , used in the stopping rule, is given by  $Z(n) = \max_a \min_{b \neq a} Z_{a,b}(n)$ , where

$$Z_{a,b}(n) = n \inf_{x \in [-f^{-1}(B), f^{-1}(\frac{B}{1-\pi})]} \left( \frac{N_a(n)}{n} \text{KL}_{\inf}^{\text{U}}(\hat{\mu}_a(n), x) + \frac{N_b(n)}{n} \text{KL}_{\inf}^{\text{L}}(\hat{\mu}_b(n), x) \right).$$

On  $\mathcal{G}_T(\epsilon')$ , for  $T \geq K + 1$  and  $l \in \mathbb{N}$  such that  $l_2(T) \geq l \geq l_1(T)$ ,

$$\begin{aligned} Z(t_l) &= t_l \max_a \min_{b \neq a} \inf_{x \in [-f^{-1}(B), f^{-1}(\frac{B}{1-\pi})]} \left( \frac{N_a(t_l)}{t_l} \text{KL}_{\inf}^{\text{U}}(\hat{\mu}_a(t_l), x) + \frac{N_b(t_l)}{t_l} \text{KL}_{\inf}^{\text{L}}(\hat{\mu}_b(n), x) \right) \\ &= t_l g \left( \hat{\mu}(t_l), \left\{ \frac{N_1(t_l)}{t_l}, \dots, \frac{N_K(t_l)}{t_l} \right\} \right) \\ &\geq t_l C_{\epsilon'}^*(\mu). \end{aligned} \tag{58}$$

Furthermore, for  $T \geq K^2 + 1$ , on  $\mathcal{G}_T(\epsilon')$ ,

$$\begin{aligned} \min\{\tau_\delta, T\} &\leq t_{l_1(T)} + \sum_{l=l_1(T)+1}^{l_2(T)} b_l \mathbf{1}(t_l < \tau_\delta) \\ &= t_{l_1(T)} + \sum_{l=l_1(T)+1}^{l_2(T)} b_l \mathbf{1}(Z(t_l) < \beta(t_l, \delta)) \\ &\leq t_{l_1(T)} + \sum_{l=l_1(T)+1}^{l_2(T)} b_l \mathbf{1}\left(t_l < \frac{\beta(t_l, \delta)}{C_{\epsilon'}^*(\mu)}\right) \\ &\leq t_{l_1(T)} + \frac{\beta(t_{l_2(T)}, \delta)}{C_{\epsilon'}^*(\mu)} + b_{l_2(T)} \\ &\leq t_{l_1(T)} + (1 + \tilde{\eta}) \frac{\beta(T, \delta)}{C_{\epsilon'}^*(\mu)} + 1, \end{aligned} \tag{59}$$

where for the last inequality, we use monotonicity of  $\beta(\cdot, \cdot)$  in the first argument, and that  $b_{l_2(T)} \leq \tilde{\eta} \frac{\beta(T, \delta)}{C_{\epsilon'}^*(\mu)} + 1$ . Next, define

$$T_0(\delta) = \inf \left\{ n \in \mathbb{N} : t_{l_1(n)} + (1 + \tilde{\eta}) \frac{\beta(n, \delta)}{C_{\epsilon'}^*(\mu)} + 1 \leq n \right\}.$$

On  $\mathcal{G}_T$ , for  $T \geq \max\{T_0(\delta), K^2 + 1\}$ , from (59) and definition of  $T_0(\delta)$ ,

$$\min\{\tau_\delta, T\} \leq t_{l_1(T)} + (1 + \tilde{\eta}) \frac{\beta(T, \delta)}{C_{\epsilon'}^*(\mu)} \leq T,$$

which gives that for such a  $T$ ,  $\tau_\delta \leq T$ . Thus, for  $T \geq \max\{T_0(\delta), K^2 + 1\}$ , we have  $\mathcal{G}_T(\epsilon') \subset \{\tau_\delta \leq T\}$  and hence,  $\mathbb{P}_\mu(\tau_\delta > T) \leq \mathbb{P}_\mu(\mathcal{G}_T^c)$ . Moreover, for a constant  $T_{\epsilon'}$ , Lemma F.5 bounds the probability of  $\mathcal{G}_T^c$  for  $T \geq T_{\epsilon'}$ . Since  $\tau_\delta \geq 0$ ,

$$\mathbb{E}_\mu(\tau_\delta) \leq T_0(\delta) + K^2 + 1 + T_{\epsilon'} + \sum_{T=T_0(\delta)+K^2+1+T_{\epsilon'}}^{\infty} \mathbb{P}_\mu(\mathcal{G}_T^c(\epsilon')). \tag{60}$$

For  $\tilde{\epsilon} > 0$ , it can be shown that

$$\limsup_{\delta \rightarrow 0} \frac{T_0(\delta)}{\log(1/\delta)} \leq \frac{(1 + \tilde{\eta})(1 + \tilde{\epsilon})}{C_{\epsilon'}^*(\mu)}. \tag{61}$$

Then, from (60), (61), and Lemma K.3,

$$\limsup_{\delta \rightarrow 0} \frac{\mathbb{E}_\mu(\tau_\delta)}{\log(1/\delta)} \leq \frac{(1 + \tilde{\eta})(1 + \tilde{\epsilon})}{C_{\epsilon'}^*(\mu)}.$$

From lower-semicontinuity of  $g(\mu', t')$  in  $(\mu', t')$  for  $\mu' \in (\mathcal{P}(\mathfrak{R}))^K$ , it follows that  $\liminf_{n \rightarrow \infty} C_{\epsilon'}^*(\mu) \geq V(\mu)$ . First letting  $\tilde{\epsilon} \rightarrow 0$  and then letting  $\epsilon' \rightarrow 0$ , we get the desired inequality.

**Lemma K.3.** *Let  $T_{\epsilon'} = \epsilon'^{-8/3}$ . Then,  $\limsup_{\delta \rightarrow 0} \frac{\sum_{T=T_{\epsilon'}}^{\infty} \mathbb{P}_{\mu}(\mathcal{G}_T^c(\epsilon'))}{\log(1/\delta)} = 0$ .*

*Proof.* The proof of this is similar to that in [2, Lemma 32]. However, the batch sizes in our algorithm may not be constant. We modify the proof to allow for this flexibility.

Recall that for  $T \in \mathbb{N}$  and  $T > K^2$ ,  $l_0(T) = l(T^{\frac{1}{4}})$ ,  $l_1(T) = l(T^{\frac{3}{4}}) + 1$ ,  $l_2(T)$  equal  $\max\{l_1(T), l(T) - 1\}$ , for  $l \in \mathbb{N}$ ,  $t_l$  denotes the beginning of  $l^{\text{th}}$  batch, and

$$\mathcal{G}_T(\epsilon') = \bigcap_{l=l_0(T)}^{l_2(T)} \{\hat{\mu}(t_l) \in \mathcal{I}_{\epsilon'}\} \bigcap_{l=l_1(T)}^{l_2(T)} \left\{ \max_{a \in [K]} \left| \frac{N_i(t_l)}{t_l} - t_a^*(\mu) \right| \leq 4\epsilon' \right\}.$$

Let

$$\mathcal{G}_T^1(\epsilon') \triangleq \bigcap_{l=l_0(T)}^{l_2(T)} \{\hat{\mu}(t_l) \in \mathcal{I}_{\epsilon'}\}.$$

Using union bounds,

$$\mathbb{P}_{\mu}(\mathcal{G}_T^c(\epsilon')) \leq \sum_{l=l_0(T)}^{l_2(T)} \mathbb{P}_{\mu}(\hat{\mu}(t_l) \notin \mathcal{I}_{\epsilon'}) + \sum_{l=l_1(T)}^{l_2(T)} \sum_{i=1}^K \mathbb{P}\left(\left|\frac{N_a(t_l)}{t_l} - t_i^*(\mu)\right| \geq 4\epsilon', \mathcal{G}_T^1(\epsilon')\right). \quad (62)$$

The first term above can be bounded by

$$\sum_{l=l_0(T)}^{l_2(T)} \sum_{a=1}^K \mathbb{P}\left(\sup_x |F_{\hat{\mu}_a(t_l)}(x) - F_a(x)| \geq \epsilon'\right).$$

From Lemma K.2, the algorithm ensures at least  $\frac{\sqrt{t_l}}{K} - 1 \geq \sqrt{t_l}/(2K)$  samples to each arm till time  $t_l$ . Using this, each summand in the bound above can be bounded as follows:

$$\mathbb{P}\left(\sup_x |F_{\hat{\mu}_a(t_l)}(x) - F_a(x)| \geq \epsilon'\right) \leq \mathbb{P}\left(\sup_x |F_{\hat{\mu}_a(t_l)}(x) - F_a(x)| \geq \epsilon'; N_a(t_l) \geq \frac{\sqrt{t_l}}{2K}\right).$$

R.h.s. in the above inequality can be bounded using union bound and DKW inequality by

$$\sum_{j=\sqrt{t_l}/(2K)}^{t_l} e^{-2j\epsilon'^2} \leq e^{-\epsilon'^2 \frac{\sqrt{t_l}}{K}} \left(1 - e^{-2\epsilon'^2}\right)^{-1}.$$

Thus, the first term in (62) is bounded by  $KT e^{-\epsilon'^2 \frac{T^{1/8}}{K}} \left(1 - e^{-2\epsilon'^2}\right)^{-1}$ .

To bound the other term in (62), for  $l \in \{l_1(T), \dots, l_2(T)\}$ , let  $M_{t_l}$  denote the set of times in  $\{1, \dots, t_l\}$  when the algorithm flipped coins to decide which arm to pull. Define

$$A_2 \triangleq \frac{1}{t_l} \sum_{j \in M_{t_l}} |t_i^*(\Pi(\hat{\mu}(j))) - t_i^*(\mu)|, \quad \text{and} \quad A_3 \triangleq \frac{1}{t_l} \sum_{j \notin M_{t_l}} |I_i(j) - t_i^*(\mu)|,$$

where  $I_i(j)$  is the indicator that  $i^{\text{th}}$  arm is pulled on  $j^{\text{th}}$  time step, and  $\hat{\mu}(j)$  denotes the empirical distribution vector at the beginning of the batch to which the time  $j$  belongs. Using these,

$$\mathbb{P}\left(\left|\frac{N_i(t_l)}{t_l} - t_i^*(\mu)\right| \geq 4\epsilon', \mathcal{G}_T^1\right) \leq \mathbb{P}\left(\left|\frac{1}{t_l} \sum_{j \in M_{t_l}} (I_i(j) - t_i^*(\Pi(\hat{\mu}(j))))\right| + A_2 + A_3 \geq 4\epsilon', \mathcal{G}_T^1\right).$$

Since  $|I_i(j) - t_i^*(\mu)| \leq 1$ , and from Lemma K.2 we have that  $t_l - |M_{t_l}| \leq t_l^{1/2}$ . For  $T \geq T_{\epsilon'}$  and  $l \geq l_1(T)$ ,  $A_3$  above satisfies

$$A_3 \leq \frac{\sqrt{t_l}}{t_l} \leq \frac{1}{\sqrt{t_{l_1}(T)}} \leq \frac{1}{T^{3/8}} \leq \epsilon'.$$

Next,

$$A_2 = \frac{1}{t_l} \sum_{\substack{j \in M_{t_l} \\ j < t_{l_0}(T)}} |t_i^*(\Pi(\hat{\mu}(j))) - t_i^*(\mu)| + \frac{1}{t_l} \sum_{\substack{j \in M_{t_l} \\ j \geq t_{l_0}(T)}} |t_i^*(\Pi(\hat{\mu}(j))) - t_i^*(\mu)|.$$

If  $t_{l_0}(T) \leq K^2$ , then the first term above is 0 since in this case,  $M_{t_l} \cap \{1, \dots, t_{l_0}(T)\}$  is empty, as the algorithm does not flip any coins in this period. Otherwise, the first term is bounded by  $\frac{t_{l_0}(T)}{t_{l_1}(T)}$ , which is further bounded by  $\frac{1}{T^{1/2}}$ , which for  $T \geq T_{\epsilon'}$ , is bounded by  $\epsilon'$ .

On  $\mathcal{G}_T^1(\epsilon')$ , the second term in  $A_2$  is at most  $\epsilon'$ , since for  $j \geq t_{l_0}(T)$   $\hat{\mu}(j) \in \mathcal{I}_{\epsilon'}$ . Thus,  $A_2 \leq 2\epsilon'$ . Thus, for  $T \geq T_{\epsilon'} = \frac{1}{\epsilon'^{8/3}}$ , and for  $l \geq l_1(T)$ ,

$$\mathbb{P} \left( \left| \frac{N_i(t_l)}{t_l} - t_i^*(\mu) \right| \geq 4\epsilon', \mathcal{G}_T^1 \right) \leq \mathbb{P} \left( \left| \sum_{j \in M_{t_l}} (I_i(j) - t_i^*(\Pi(\hat{\mu}(j)))) \right| \geq t_l \epsilon', \mathcal{G}_T^1 \right).$$

Let  $S_n = \sum_{j \in M_n} (I_i(j) - t_i^*(\mu))$ . Clearly,  $S_n$  is a sum of 0-mean random variables. Whence, it is a martingale, and satisfies  $|S_{n+1} - S_n| \leq 1$ . Azuma-Hoeffding inequality then gives,

$$\mathbb{P} \left( \left| \frac{N_i(t_l)}{t_l} - t_i^*(\mu) \right| \geq 4\epsilon', \mathcal{G}_T^1 \right) \leq 2 \exp \left( -\frac{\epsilon'^2 t_l^2}{2 |M_{t_l}|} \right) \leq 2 \exp \left( -\frac{\epsilon'^2 t_l}{2} \right) \leq 2 \exp \left( -\frac{\epsilon'^2 T^{3/4}}{2} \right),$$

where for the last inequality, we used that  $l \geq l_1(T)$ . Summing this over  $l$  and  $i$ , the second term in (62) is bounded by

$$2KT \exp \left( -\frac{\epsilon'^2 T^{3/4}}{2} \right).$$

□

## L Details on the Experiments

In this section we report the numerical studies undertaken to validate our methods. We are interested in the question whether the asymptotic sample complexity result of Theorem 4.1 is representative at reasonable confidence  $\delta$ . Whether this is the case or not differs greatly between pure exploration setups. [27] see state-of-the-art numerical results in Bernoulli BAI for Track-and-Stop with  $\delta = 0.1$ , while [22] present a Minimum Threshold problem instance where the Track-and-Stop asymptotics have not kicked in yet at  $\delta = 10^{-20}$ .<sup>1</sup> The latter work suggests the difference may very well lie in the specifics of the lower-bound optimisation problem for each task, with the good case arising when the optimal solution  $t^*$  to the lower bound puts positive mass on all arms, so that convergence of estimates does not require forced exploration. Our heavy-tailed best CVaR problem (4) indeed has full support, and our experiments confirm that the approach is practical at moderate  $\delta$ .

To focus on the heavy-tailed regime, we select arm distributions for which higher moments do not exist. In particular, we choose Fisher-Tippett ( $F(\mu, \sigma, \gamma)$ ), Pareto ( $P(\mu, \sigma, \gamma)$ ), and mixtures of Fisher-Tippett arms (these heavy tailed distributions arise in extreme value theory). The standard Fisher-Tippett distribution with shape parameter  $\gamma$  has CDF  $F_\gamma^F(x) = e^{-(1+\gamma x)^{-1/\gamma}}$  (continuously extended to  $\gamma = 0$ ), and this is lifted to three parameters  $F_{\mu, \sigma, \gamma}^F(x) = F_\gamma^F(\frac{x-\mu}{\sigma})$  by adding a location  $\mu$  and scale  $\sigma$ . The  $m$ -th moment of  $F_\gamma$  exists iff  $\gamma < 1/m$ . Similarly, CDF for  $P(\mu, \sigma, \gamma)$  is given by  $F_{\mu, \sigma, \gamma}^P(x) := 1 - (1 + \gamma(\frac{x-\mu}{\sigma}))^{-1-1/\gamma}$ . For  $\gamma > 0$ , both  $F(\mu, \sigma, \gamma)$  and  $P(\mu, \sigma, \gamma)$ , have unbounded support on the positive axis.  $F(\mu, \sigma, \gamma)$  has unbounded support on the negative axis for  $\gamma < 0$ . We create interesting two-sided distributions by taking (binary) mixtures of these.

In our first experiment, we look at the distribution of the stopping time of the algorithm as a function of  $\delta$ . In this setup, there are three arms: arm 1 is a uniform mixture of  $F(-1, 0.5, 0.4)$  and  $F(-3, 0.5, -0.4)$ , arm 2 is  $P(0, 0.2, 0.55)$  and arm 3 is  $F(-0.5, 1, 0.1)$  with respective CVaRs at quantile 0.6 being  $-0.1428, 0.974$  and  $1.547$ . We select  $\epsilon = 0.7$  and  $B = 4.5$ . This is a moderately hard problem of complexity  $V^{-1}(\mu)^* = 49.7$ . The arm-densities are shown in Figure 2b.

<sup>1</sup>[21, Figure 2] show that (unmodified) Track-and-Stop is not asymptotically optimal for problems with multiple correct answers including  $(\epsilon, \delta)$ -BAI. They have to go out to  $\delta = e^{-80}$  to see the suboptimal asymptotics.

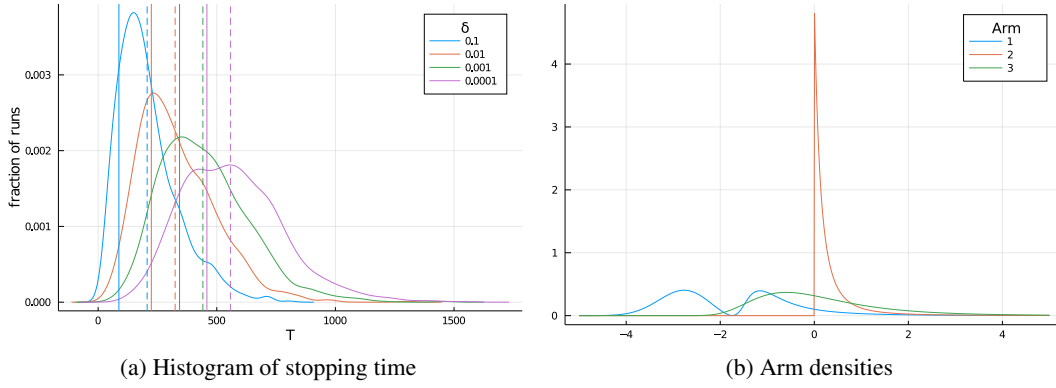

Figure 2: Histogram of stopping times based among 1000 runs on 3 arms with heavy-tailed distributions, with densities shown in (b), as a function of confidence  $\delta$ . Vertical bars indicate the lower bound (4) (solid), and a version adjusted to our stopping threshold (7) (dashed), i.e., the  $n$  that solves  $n = \beta(n, \delta)V(\mu)^{-1}$ .

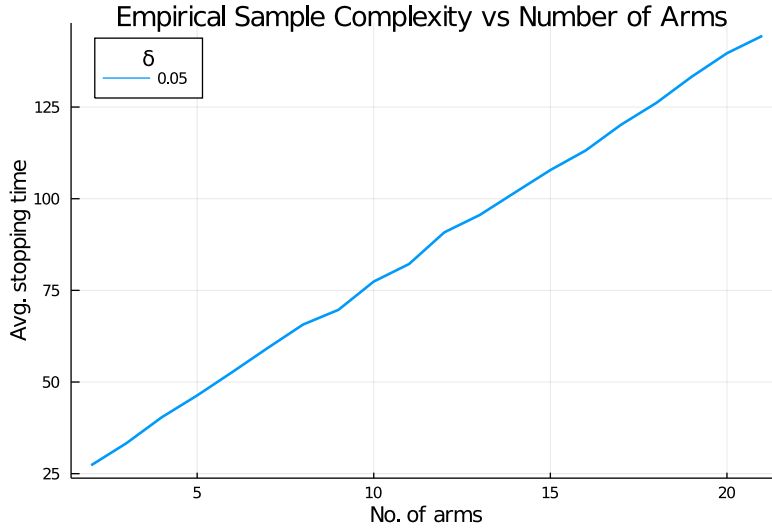

Figure 3: Stopping time (empirical sample complexity) of the algorithm at  $\delta = 0.05$  as a function of number of arms. Each data point is an average of 1000 independent runs.

Figure 2a shows histograms of the sample complexity, together with the lower bound (solid vertical line) and a second reference point (dashed line) which is the  $n$  that solves  $n = V(\mu)^{-1}\beta(n, \delta)$ , i.e. the time by which our stopping threshold activates for the optimal sampling allocation. We see that, for a range of practical  $\delta$ , the actual stopping time is very close to it. In particular, this means that the algorithm learns to approximate the optimal sampling strategy. We thus conclude that even at moderate  $\delta$  the average sample complexity closely matches the lower bound, especially after adjusting it for the lower-order terms in the employed stopping threshold  $\beta(n, \delta)$ . This demonstrates that our asymptotic optimality is in fact indicative of the performance in practice.

In our second experiment, we let  $\mathcal{L}$  be the collection of all distributions with  $1.7^{th}$ -moment bounded by 4.5. We demonstrate in Figure 3 that the stopping time of the algorithm (empirical sample complexity), at  $\delta = 0.05$ , increases linearly with the number of arms, though currently theory shows a dependence of  $K^4$ , where  $K$  is number of arms, in the lower-order terms (see the very last line of Lemma F.4). The experiment suggests that this  $K^4$  dependency is an artefact, as it does not materialise in practise. For this experiment, we start with a 2-armed bandit: arm 1 being a uniform mixture of  $F(-1, 0.5, .4)$  and  $F(-3, 0.5, -.4)$ , and arm 2 being  $P(2.25, 0.1, 0.01)$ . The CVaRs for these arms at  $0.6^{th}$  quantile are  $-0.1428$  and  $2.4439$ , respectively. Here, arm 2 is sub-optimal (recall

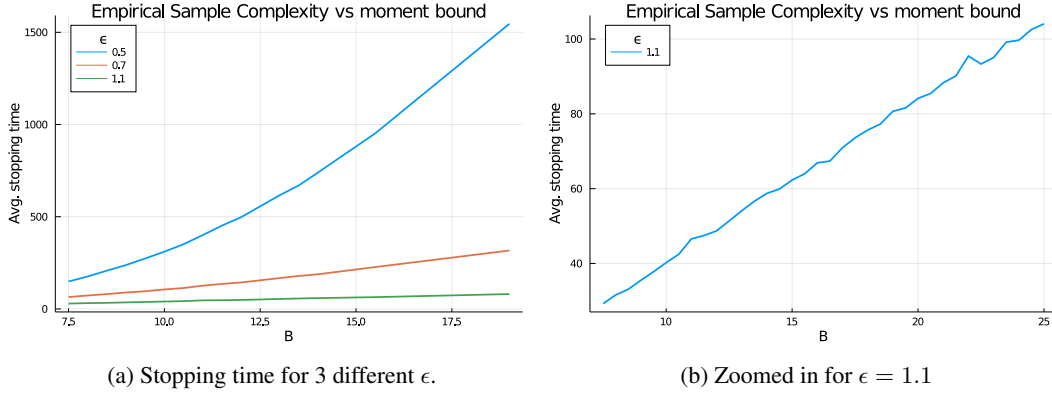

Figure 4: Stopping time (empirical sample complexity) of the algorithm as a function of the moment bound,  $B$ . The graph shows the dependence for 3 values of  $\epsilon$ : 0.5, 0.7, and 1.1. We observe that for  $\epsilon < 1$ , the sample complexity is a convex function of  $B$ , and is linear for  $\epsilon > 1$ . Each data point is an average of 1000 independent runs.

that we are interested in the arm with minimum CVaR). We then keep adding more arms which are replicas of arm 2, thus minimizing the effect of other factors on the sample complexity.

In our final experiment, we look at the dependence of empirical sample complexity on the parameter  $B$ . The arms are the same as in our previous experiment, i.e., arm 1 is a uniform mixture of  $F(-1, 0.5, .4)$  and  $F(-3, 0.5, -.4)$ , and arm 2 is  $P(2.25, 0.1, 0.01)$ . In this experiment, we change the comparator class  $\mathcal{L}$  by changing only  $B$ .  $\epsilon$  is set to one of 0.5, 0.7, or 1.1, and we start with  $B = 7.5$ , and increase it upto 20, in steps of 0.5. Figure 4a plots the stopping time of the algorithm as a function of  $B$ , for the 3 different values of  $\epsilon$ . It demonstrates that for  $\epsilon < 1$ , the dependence is convex, approaching to linear-dependence as  $\epsilon \rightarrow 1$ . We in fact sketch approximate lower and upper bounds for  $V(\mu)$  (Section M), a quantity that characterizes the asymptotic sample complexity. These bounds show that sample complexity scales as  $B^{\frac{1}{\epsilon}}$  for  $\epsilon < 1$ , and scales linearly for  $\epsilon > 1$ . This is clearly visible from the graph in Figure 4a, where the blue curve, which corresponds to  $\epsilon = 0.5$ , can be checked to be quadratically increasing, and the curve in Figure 4b demonstrates a linear dependence for  $\epsilon = 1.1$ .

In each case we perform 1000 independent replications. We use the stylised threshold  $\beta(n, \delta) = \log \frac{1+\log(n)}{\delta}$ . This threshold is not currently allowed by theory. Yet we find that it is still conservative, as we do not observe a single mistake. Finally, instead of computing  $t^*(\hat{\eta}_n)$  at each round, we make use of a technique recently introduced by [22] to reduce computation: namely after each round we perform a single step of an iterative saddle point solver for  $t^*$ . We do not make use of their optimistic gradients, instead relying on classical  $\sqrt{n}$ -forced exploration. We use C-tracking from [27].

Finally, the computation of the stopping statistic (GLRT) and also the gradient involves an optimisation over  $x_0$  as in the optimization problem in Proposition 3.5. We use bisection search to find the minimum in  $x_0$ . Even though this is not licensed by theory, we consistently observe in practice that after a few rounds all these minimisation problems are in fact quasiconvex in  $x_0$ . We use the ellipsoid method for the inner minimisation problem. As the number of terms grows by one each round, the overall run-time is  $O(Kn)$  in round  $n$ .

We conclude that even at moderate  $\delta$  the average sample complexity closely matches the lower bound (with adjusted stopping threshold  $\beta(n, \delta)$ ). This demonstrates that our asymptotic optimality is in fact indicative of the performance in practice. The stopping time of the algorithm increases linearly with the number of arms. Moreover, for  $\epsilon < 1$ , the stopping time is a convex function of the class parameter,  $B$ , indicating that it is important to correctly estimate this parameter for smaller  $\epsilon$ .

## M Interpretable Lower Bound Approximation

In this section we consider an approximate version of the lower bound problem. Even though it is heuristic, it is worthwhile as it gives an interpretable result. We take as our starting point (57), which we may invert to give us

$$\begin{aligned}\text{KL}_{\inf}^{\text{U}}(\eta, x) &\approx \left(\frac{4}{1-\pi}\right)^{1+1/\epsilon} B^{-1/\epsilon} (x - c_{\pi}(\eta))_+^{1+1/\epsilon} \\ \text{KL}_{\inf}^{\text{L}}(\eta, x) &\approx \left(\frac{4}{1-\pi}\right)^{1+1/\epsilon} B^{-1/\epsilon} (c_{\pi}(\eta) - x)_+^{1+1/\epsilon}\end{aligned}$$

Let  $\mu_1$  be the best CVaR arm, in that  $c_{\pi}(\mu_1) < c_{\pi}(\mu_j)$  for all  $j > 1$ . The lower bound problem (see Lemma 3.1) then requires solving the approximate problem (denoted by a tilde)

$$\tilde{V}(\mu) := \sup_{t \in \Sigma_K} \min_{j \neq 1} \inf_x \left(\frac{4}{1-\pi}\right)^{1+1/\epsilon} B^{-1/\epsilon} \left\{ t_1 (x - c_{\pi}(\mu_1))_+^{1+1/\epsilon} + t_j (c_{\pi}(\mu_j) - x)_+^{1+1/\epsilon} \right\}. \quad (63)$$

Plugging in the optimiser  $x = \frac{t_1^{\epsilon} c_{\pi}(\mu_1) + t_j^{\epsilon} c_{\pi}(\mu_j)}{t_1^{\epsilon} + t_j^{\epsilon}}$ , which is the midpoint under the renormalised  $\epsilon$ -powered weights, results in

$$\tilde{V}(\mu) = \left(\frac{4}{1-\pi}\right)^{1+1/\epsilon} B^{-1/\epsilon} \sup_{t \in \Sigma_K} \min_{j \neq 1} \frac{\Delta_j^{1+1/\epsilon}}{(t_1^{-\epsilon} + t_j^{-\epsilon})^{1/\epsilon}},$$

where we abbreviated  $\Delta_j = c_{\pi}(\mu_j) - c_{\pi}(\mu_1)$  for  $j \neq 1$  and  $\Delta_1 := \min_{j \neq 1} \Delta_j$ . From this point we can already see that the characteristic time,  $1/\tilde{V}(\mu)$ , scales with  $B^{1/\epsilon}$ , which is clearly visible e.g. the blue line in in Figure 4a, corresponding with  $\epsilon = 1/2$ , and which matches a quadratic (quadrupling when  $B$  doubles).

At this point we can follow [27, Appendix A.4] and obtain an interpretable sandwich on  $\tilde{V}(\mu)$  with a multiplicative factor  $2^{1/\epsilon}$ .

**Lemma M.1.**

$$\left(\frac{1-\pi}{4}\right)^{1+1/\epsilon} B^{1/\epsilon} \sum_j \frac{1}{\Delta_j^{1+1/\epsilon}} \leq \tilde{V}(\mu)^{-1} \leq 2^{1/\epsilon} \left(\frac{1-\pi}{4}\right)^{1+1/\epsilon} B^{1/\epsilon} \sum_j \frac{1}{\Delta_j^{1+1/\epsilon}}.$$

*Proof.* Let  $C = \left(\frac{1-\pi}{4}\right)^{1+1/\epsilon}$ . First, by plugging in the sub-optimal choice for  $t$  given by

$$t_j = \frac{\Delta_j^{-1-1/\epsilon}}{\sum_j \Delta_j^{-1-1/\epsilon}},$$

where we interpret  $\Delta_1 = \min_{j \neq 1} \Delta_j$ . We then find

$$\tilde{V}(\mu)^{-1} \leq C B^{1/\epsilon} \left( \sum_j \Delta_j^{-1-1/\epsilon} \right) \max_{j \neq 1} \left( \left( \frac{\Delta_1}{\Delta_j} \right)^{1+\epsilon} + 1 \right)^{1/\epsilon} \leq \sum_j \frac{2^{1/\epsilon} C B^{1/\epsilon}}{\Delta_j^{1+1/\epsilon}}.$$

We may also obtain a lower bound on the characteristic time of the same order by considering the sub-optimal choice  $x = c_{\pi}(\mu_1)$  in (63) instead. We obtain

$$\tilde{V}(\mu^*) \leq \sup_{t \in \Sigma_K} \min_{j \neq 1} t_j C^{-1} B^{-1/\epsilon} \Delta_j^{1+1/\epsilon} = \frac{1}{\sum_j \frac{C B^{1/\epsilon}}{\Delta_j^{1+1/\epsilon}}}.$$

Taking the reciprocal gives the result.  $\square$
